# Supplementary material for: The effects of university students’ fragmented reading on cognitive development in the new media age: evidence from Chinese higher education
Source: PeerJ. 2022 Aug 23;10:e13861. doi: 10.7717/peerj.13861 (PMC9415515; doi:10.7717/peerj.13861)
Supplement: Supplemental Information 1 [file peerj-10-13861-s001.xls]

## Sheet: Sheet1
Serial No.	N1	N2	N3	N4	N5	N6	N7	N8_1	N8_2	N8_3	N8_4	N8_5	N8_6	N8_7	N8_8	N8_9	N8_10	N8_11	N8_12	N8_13	N8_14	N8_15	N8_16	N8_17	N8_18	N8_19	N8_20	N8_21	N8_22	N9_1	N9_2	N9_3	N9_4	N9_5	N9_6	N9_7	N9_8	N9_9	N9_10	N9_11
1	2	6	23	5	职业技术教育 Vocational and Technical Education	2	2	4	2	4	4	5	2	1	5	4	2	2	2	2	4	5	5	2	3	3	4	4	5	4	4	3	4	1	4	3	2	4	3	2
2	2	6	23	4	教育学 Pedagogy	3	1	4	2	2	2	2	4	2	4	2	2	2	2	2	4	4	2	2	2	2	4	4	4	4	2	4	2	4	4	4	4	4	2	2
3	2	6	22	5	职业技术教育 Vocational and Technical Education	3	1	4	4	3	2	2	4	2	4	4	4	2	2	3	4	4	4	3	3	4	4	4	2	4	2	2	4	2	4	4	3	2	4	3
4	2	6	23	4	教育学 Pedagogy	3	1	4	4	4	4	4	4	2	4	4	2	4	4	4	4	4	4	2	2	4	4	2	2	4	4	2	2	2	2	4	4	4	2	2
5	1	4	22	4	电子科学与技术 Electronic Science and Technology	3	1	4	2	3	3	4	3	4	4	4	4	3	2	3	4	4	4	4	4	4	3	4	4	4	4	4	2	3	4	3	4	4	3	2
6	1	4	22	4	微电子科学与工程 Microelectronics Science and Engineering	1	1	2	4	4	2	4	3	4	2	4	3	4	2	2	4	4	4	2	2	2	4	4	4	4	4	3	3	4	4	3	3	2	3	3
7	1	1	18	4	体育教育 Physical Education	3	1	4	2	2	1	2	5	1	4	4	4	2	2	2	2	2	2	2	2	4	2	2	2	4	4	4	4	4	3	2	2	4	4	3
8	1	4	22	5	机电技术教育 Electromechanical Technology Education	2	2	1	1	1	1	1	1	1	1	1	1	1	1	1	1	1	1	1	1	1	1	1	1	1	1	1	1	1	1	1	1	1	1	1
9	1	1	18	4	体育教育 Physical Education	1	1	2	1	1	1	2	5	2	4	3	1	2	1	3	2	5	4	1	1	4	4	3	2	5	4	3	2	5	3	2	4	2	5	5
10	2	4	21	5	汽车维修工程教育 Automotive Maintenance Engineering Education	1	1	5	4	4	4	4	2	5	4	3	3	4	2	4	4	4	4	4	2	4	4	4	4	3	3	4	4	4	4	5	4	5	2	3
11	2	5	23	5	心理学 Psychology	3	2	4	2	4	4	5	5	5	5	4	2	5	2	2	4	4	5	4	4	4	4	4	4	4	5	4	5	4	4	4	2	2	4	4
12	2	4	21	4	汉语言文学 Chinese Language and Literature	2	2	4	2	4	3	4	4	4	4	3	4	4	4	4	4	4	4	3	3	4	4	4	4	4	4	4	3	4	4	4	4	4	3	4
13	1	4	21	5	机电技术教育 Electromechanical Technology Education	2	1	4	3	4	4	4	2	4	4	2	2	4	2	4	4	4	4	2	4	3	4	3	4	4	4	4	4	2	4	3	4	4	2	2
14	1	4	21	4	生物技术 Biotechnology	5	2	3	4	4	3	2	4	3	4	2	2	4	4	4	4	4	4	2	2	4	4	4	4	4	4	4	2	3	4	4	4	2	3	4
15	2	5	23	5	心理健康教育 Mental Health Education	3	1	4	2	2	4	1	5	4	4	1	3	2	1	2	1	4	1	1	2	2	3	4	3	3	1	3	2	4	4	2	3	2	4	3
16	2	5	23	5	环境工程 Environmental Engineering	3	1	5	2	1	4	3	4	3	4	4	4	4	4	4	4	4	4	4	4	4	4	4	4	4	4	4	4	4	4	4	4	4	4	4
17	2	2	19	5	交通运输 Transportation	2	1	3	2	3	3	4	4	4	2	4	3	2	2	2	2	4	3	2	4	4	2	2	2	4	4	2	2	2	4	2	2	2	4	4
18	1	2	19	5	机械设计制造 Mechanical Design and Manufacture	3	1	3	4	2	4	3	4	5	4	4	4	4	4	3	3	4	4	3	3	3	4	4	4	4	4	4	4	5	5	3	4	4	4	4
19	2	2	19	5	交通运输 Transportation	4	1	5	2	3	2	2	5	5	5	4	4	4	2	3	4	4	4	2	4	5	2	5	5	5	5	5	5	5	5	5	5	3	5	5
20	1	2	20	4	交通运输 Transportation	3	1	2	2	2	2	4	3	5	3	3	3	3	3	3	3	3	3	3	3	3	3	5	5	3	3	3	3	3	3	3	3	3	3	3
21	1	3	20	5	应用电子技术教育 Applied Electronic Technology Education	1	1	4	3	3	3	4	4	2	4	3	3	3	3	3	3	3	3	3	3	3	3	3	3	3	3	3	3	3	3	3	3	3	3	3
22	2	4	21	5	工业设计 Industrial Design	3	1	5	2	4	3	2	4	4	4	4	2	2	2	2	2	2	2	2	2	2	2	2	2	2	2	2	2	2	2	2	2	2	2	2
23	2	6	24	5	教育学 Pedagogy	2	1	4	2	4	2	2	4	3	4	5	3	4	2	2	2	4	4	3	2	4	4	2	2	5	4	3	2	5	5	2	4	2	4	4
24	1	2	20	5	机电技术教育 Electromechanical Technology Education	1	1	1	1	3	2	3	5	5	5	4	3	5	4	4	5	5	5	4	5	5	5	5	5	4	3	5	5	4	4	4	4	4	5	5
25	1	3	20	4	生物科学	3	2	3	2	3	1	4	4	4	2	3	2	5	1	3	3	4	4	2	3	4	4	3	3	4	3	2	2	4	4	2	4	3	4	3
26	1	2	19	5	机电技术教育 Electromechanical Technology Education	2	2	2	1	1	1	5	5	4	4	5	5	4	5	5	5	4	4	4	4	4	4	4	4	4	4	4	4	5	4	4	4	4	5	5
27	1	2	20	4	交通运输 Transportation	3	1	2	2	4	2	2	2	5	2	2	2	5	2	4	5	2	5	2	4	4	5	5	5	2	2	2	3	2	2	4	4	4	2	3
28	2	2	19	5	机械设计制造 Mechanical Design and Manufacture	1	3	3	3	3	3	3	3	3	3	3	3	3	3	3	3	3	3	3	3	3	3	3	3	4	2	2	3	2	3	1	3	3	3	3
29	1	2	19	5	机电技术教育 Electromechanical Technology Education	3	2	3	2	2	1	1	4	2	3	4	4	4	5	1	3	2	5	1	1	3	2	2	2	4	4	4	2	4	4	2	2	1	5	5
30	2	2	19	5	机械 Mechanical	1	3	3	3	3	3	3	3	3	3	3	3	3	3	3	3	3	3	3	3	3	3	3	3	3	3	3	3	3	3	3	3	3	3	3
31	2	6	24	5	西方经济学 Western Economics	1	1	4	2	2	2	4	4	2	4	4	4	4	2	2	2	4	4	4	2	4	4	2	2	4	4	4	4	4	4	2	4	4	4	4
32	2	3	21	4	小学教育 Primary Education	2	2	5	4	4	4	4	4	4	4	4	3	3	4	4	4	4	4	3	4	3	4	4	4	4	4	4	3	4	4	4	4	2	3	3
33	2	3	20	4	小学教育 Primary education	3	1	4	2	4	1	2	4	2	4	4	4	4	4	2	2	4	4	4	2	4	4	4	4	4	4	4	4	4	4	2	2	2	3	2
34	2	7	24	4	生物学 Biology	3	1	4	3	2	3	4	3	5	5	2	2	4	4	5	5	5	5	3	4	4	5	5	5	4	4	3	3	3	4	4	4	5	3	4
35	2	2	19	5	交通运输 Transportation	1	1	4	4	3	4	4	4	2	4	4	2	2	2	2	4	4	4	4	4	4	2	2	2	4	3	3	4	2	4	2	2	4	4	4
36	2	3	20	5	交通运输 Transportation	3	1	4	2	2	2	2	4	2	4	4	2	2	2	4	2	4	3	2	2	4	3	4	4	4	4	2	4	4	4	4	4	4	4	2
37	1	2	19	5	机械设计制造 Mechanical Design and Manufacture	2	1	4	2	4	3	2	3	4	3	3	2	4	4	2	3	4	2	2	3	2	4	4	3	4	3	2	2	4	4	2	4	4	3	4
38	2	2	18	5	机械设计制造 Mechanical Design and Manufacture	4	1	4	4	3	3	4	4	4	4	4	4	4	4	4	4	4	4	4	4	4	4	4	4	4	4	4	4	4	4	4	4	4	4	4
39	2	3	20	4	小学教育 Primary education	3	1	4	2	2	1	3	4	2	3	4	3	3	4	3	2	4	4	3	3	3	4	2	2	4	4	4	3	4	3	4	2	2	4	4
40	2	6	24	6	生物学 Biology	2	2	5	1	5	2	4	4	4	4	3	1	4	3	4	2	3	4	3	3	3	2	4	4	4	4	3	2	3	4	4	3	3	3	2
41	1	2	20	6	机械设计制造 Mechanical Design and Manufacture	1	2	2	3	2	3	2	4	3	2	3	4	2	3	3	4	3	2	3	4	2	3	4	2	2	4	3	2	4	3	2	2	4	4	3
42	2	5	22	6	化妆品科学与技术 Cosmetic Science and Technology	2	1	5	2	4	2	4	3	5	5	3	2	2	2	4	4	4	4	2	4	4	4	4	4	3	3	2	4	3	4	4	4	3	4	3
43	1	6	23	6	古典文献学 Classical Philology	3	1	4	3	2	2	3	4	2	2	2	4	2	1	1	3	2	3	2	2	2	2	4	2	4	4	2	2	4	3	1	2	2	4	4
44	2	2	19	5	机电技术教育 Electromechanical Technology Education	3	1	5	3	3	4	3	4	5	5	3	3	4	4	4	5	5	4	3	3	4	4	4	4	4	4	3	3	3	4	3	3	3	4	3
45	2	5	24	6	市政工程 Municipal Engineering	2	1	5	2	4	3	4	4	4	4	3	3	4	4	4	4	4	4	4	4	4	4	4	4	4	3	3	3	3	3	4	4	4	3	3
46	2	2	18	5	机械设计制造 Mechanical Design and Manufacture	1	1	2	4	4	4	2	3	4	2	4	1	2	2	2	2	3	2	2	2	2	2	2	2	4	2	2	2	2	4	4	4	3	4	4
47	1	7	27	5	水产养殖 Aquaculture	3	1	3	2	3	1	4	1	3	2	3	1	3	1	1	2	3	1	1	1	4	3	4	2	1	1	1	1	5	3	1	3	3	5	3
48	2	2	19	5	交通运输 Transportation	3	1	4	3	4	2	4	4	2	3	4	4	4	2	2	2	3	2	3	3	4	3	2	3	4	4	3	3	4	4	3	2	2	4	4
49	2	2	19	4	机电技术教育 Electromechanical Technology Education	5	1	4	4	3	2	3	4	4	3	3	2	3	3	4	2	1	1	1	1	3	3	4	3	4	4	2	2	2	4	4	2	2	3	4
50	2	2	19	5	工业设计 Industrial Design	2	1	4	4	4	3	3	3	4	4	4	3	3	3	3	4	4	4	4	4	4	2	3	3	3	3	3	3	4	3	2	3	2	4	4
51	2	3	20	4	小学教育 Primary education	3	1	2	1	3	1	3	4	4	2	3	3	3	2	4	3	4	5	1	3	3	3	3	3	4	4	3	5	3	3	4	4	2	3	4
52	2	3	21	4	小学教育 Primary education	1	2	3	3	3	3	3	3	4	3	3	4	4	2	2	2	4	3	4	3	3	3	4	3	4	4	3	4	4	3	4	4	3	4	4
53	1	2	19	4	工业设计 Industrial Design	4	1	2	2	5	1	3	3	5	5	5	3	4	3	5	5	5	5	5	5	5	5	5	2	3	3	2	4	2	3	4	2	3	4	4
54	2	3	20	5	应用电子技术教育 Applied Electronic Technology Education	2	1	3	3	3	3	3	3	3	3	3	3	3	3	3	3	3	3	3	3	3	3	3	3	3	3	3	3	3	3	3	3	3	3	3
55	2	6	24	5	人文地理 Human Geography	3	2	4	2	3	2	3	4	3	3	4	4	4	3	3	3	3	4	4	3	4	4	4	4	4	4	4	4	4	4	4	4	4	4	4
56	1	2	19	5	机电技术教育 Electromechanical Technology Education	2	1	3	3	3	3	3	3	3	3	3	3	3	3	3	3	3	3	4	3	4	3	4	3	4	4	3	4	3	4	3	4	3	4	3
57	1	2	19	5	工业设计 Industrial Design	2	1	5	1	1	4	5	4	5	5	3	3	3	4	4	4	4	4	4	4	4	5	5	5	3	3	2	3	4	5	4	5	2	4	4
58	1	1	18	4	体育教育 Physical Education	3	2	5	1	5	5	1	5	5	5	5	5	5	5	5	5	5	5	5	5	5	5	1	1	5	5	5	5	5	5	5	5	1	5	5
59	2	4	22	4	生物技术 Biotechnology	2	1	4	1	3	3	4	4	4	3	3	4	4	3	1	3	4	4	1	1	3	4	1	1	4	4	4	4	4	4	2	4	2	4	4
60	1	2	20	5	交通运输 Transportation	4	1	4	3	3	4	4	5	5	3	3	2	3	2	4	3	3	3	3	3	3	3	3	3	4	3	4	3	4	3	4	3	4	3	3
61	2	4	20	5	生物技术 Biotechnology	3	1	5	3	4	4	4	5	2	4	4	2	2	2	2	4	4	4	4	4	4	4	4	4	4	4	4	4	4	4	2	4	4	4	4
62	1	4	23	4	汽车维修工程教育 Automotive Maintenance Engineering Education	3	1	4	3	2	4	5	4	4	4	3	2	4	4	4	4	4	4	4	4	4	4	5	4	3	2	2	4	2	4	4	4	4	2	2
63	1	6	24	6	生物工程 Biological Engineering	3	2	4	4	4	2	4	5	4	5	4	4	1	1	2	2	4	4	2	4	4	2	1	2	4	4	4	4	4	4	2	2	4	4	4
64	1	4	22	4	生物技术 Biotechnology	2	1	4	3	4	2	3	2	3	3	4	3	3	2	2	2	4	3	3	4	4	4	3	3	4	4	4	3	3	4	4	4	3	4	4
65	1	4	21	4	机电技术教育 Electromechanical Technology Education	2	1	4	2	2	2	1	5	4	5	2	2	4	4	4	5	4	5	2	1	4	4	4	4	3	4	2	2	2	4	2	2	4	4	2
66	1	4	21	4	生物技术 Biotechnology	2	2	4	4	4	4	4	3	1	3	2	2	2	3	2	3	3	2	2	2	3	3	2	3	2	4	2	2	4	3	2	2	3	3	3
67	1	4	21	5	机电技术教育（师范） Electromechanical Technology Education（Normal）	1	1	4	2	4	2	2	4	2	4	4	2	4	4	2	2	4	4	4	4	4	2	2	2	4	4	2	2	2	2	2	2	4	4	4
68	1	4	21	5	机电技术教育 Electromechanical Technology Education	3	1	2	2	2	2	2	4	4	4	4	4	4	4	4	4	4	4	4	4	4	4	4	4	4	4	4	4	4	4	4	4	4	4	4
69	2	2	19	4	机电技术教育 Electromechanical Technology Education	2	1	5	3	4	4	4	4	5	4	4	2	4	3	4	3	4	4	2	3	4	4	4	4	4	3	3	2	2	4	3	3	3	2	3
70	2	2	19	5	机械设计制造（全英文） Mechanical Design and Manufacture(English）	2	2	3	2	2	4	4	4	2	4	4	2	2	2	3	3	4	4	4	3	4	4	4	4	4	4	2	2	3	4	3	3	3	4	4
71	2	2	20	4	小学教育 Primary education	3	1	2	2	2	3	5	5	5	3	4	2	4	3	5	3	3	4	2	2	4	4	4	4	4	4	3	2	3	4	4	5	4	2	2
72	1	4	22	4	机电技术教育 Electromechanical Technology Education	3	1	3	2	3	3	3	4	2	2	3	4	3	2	3	3	4	3	4	3	4	3	3	3	4	4	3	3	3	3	2	3	3	3	3
73	1	2	20	5	机械设计制造 Mechanical Design and Manufacture及自动化	2	1	3	2	3	2	2	4	2	1	3	3	3	2	4	3	3	4	2	3	3	2	2	3	4	4	2	3	3	4	1	3	2	3	4
74	2	6	24	4	学科教学（生物） Subject Teaching (Biology)	3	1	4	2	4	2	4	4	4	4	3	2	4	2	4	4	2	4	2	3	4	4	4	4	4	4	4	4	4	4	4	2	2	2	2
75	2	3	20	4	食品科学与工程 Food science and engineering	3	2	5	3	5	4	5	4	4	5	3	4	5	4	4	4	4	4	4	4	4	4	5	5	3	3	3	3	2	3	4	4	3	4	3
76	2	5	22	6	生物学 Biology	3	1	5	3	2	3	2	4	2	5	5	2	2	2	4	5	5	1	4	4	2	2	2	2	2	2	2	2	2	2	2	2	2	2	2
77	2	3	20	5	交通运输 Transportation	2	1	4	2	4	1	2	4	2	4	3	2	2	2	2	2	3	4	3	2	4	4	4	3	4	4	4	3	3	3	3	3	2	3	3
78	1	4	22	4	机电技术教育 Electromechanical Technology Education	4	1	4	4	3	3	4	3	5	4	4	2	4	2	4	4	4	4	4	3	4	3	4	4	5	5	4	3	4	4	3	3	4	3	2
79	2	2	19	5	交通运输 Transportation	4	1	5	3	4	4	3	3	2	4	4	4	2	3	3	4	4	4	3	4	4	4	4	4	4	4	4	4	2	4	4	2	2	4	4
80	2	2	20	4	交通运输 Transportation	2	2	2	4	2	2	4	4	2	4	4	4	2	2	2	2	2	4	2	2	4	2	1	1	4	4	4	3	4	4	4	2	2	4	4
81	1	6	23	6	化学工程 Chemical Engineering	3	2	5	1	5	1	4	4	4	4	4	4	4	2	4	4	4	4	4	4	4	4	4	4	4	4	4	4	4	4	4	4	4	4	4
82	1	4	21	4	机电技术教育 Electromechanical Technology Education	3	2	5	4	5	4	4	5	5	5	5	5	5	4	5	5	5	5	4	2	3	2	4	4	5	2	4	4	1	4	5	5	4	5	3
83	2	3	21	2	计算机信息管理 Computer Nnformation Management	2	1	4	2	4	1	4	4	1	3	4	4	4	1	1	2	5	2	2	2	4	2	2	2	4	4	4	4	4	4	4	4	4	4	4
84	2	3	21	4	小学教育 Primary education	2	2	4	1	3	4	3	4	4	4	4	2	4	4	4	3	4	3	3	3	4	3	4	4	4	3	4	3	4	4	3	3	4	3	3
85	1	1	19	5	交通运输 Transportation	1	1	1	1	1	1	1	1	1	1	1	1	1	1	1	1	1	1	1	1	1	1	1	1	1	1	1	1	1	1	1	1	1	1	1
86	1	4	24	5	通信工程 Communication Engineering	3	1	4	4	5	1	4	5	2	4	4	5	5	2	2	4	4	4	5	4	4	5	4	5	4	5	5	5	4	4	4	4	4	4	5
87	2	2	19	5	交通运输（全英文） Transportation（English）	4	2	2	2	5	2	2	4	2	2	4	3	2	2	4	2	5	4	2	4	4	2	2	4	5	5	2	5	2	4	2	2	4	4	2
88	2	3	21	4	小学教育 Primary education	1	1	4	2	2	2	4	4	5	4	4	2	4	4	4	4	4	4	4	4	4	4	4	4	4	4	4	4	4	4	4	4	4	4	4
89	2	2	19	4	小学教育 Primary education	3	1	4	3	4	3	4	4	2	4	4	3	4	3	3	2	4	3	2	2	4	4	3	4	4	4	4	3	3	4	4	4	3	3	3
90	2	2	19	5	交通运输 Transportation	2	1	4	3	4	4	4	4	4	4	3	3	4	4	4	3	4	4	4	4	4	4	2	2	4	4	4	4	2	4	3	4	4	3	3
91	1	3	21	5	轮机 Turbine	3	1	2	4	2	2	3	5	2	2	2	3	2	2	4	4	4	4	2	1	2	2	3	2	4	4	2	2	4	4	1	3	1	5	5
92	1	6	24	6	海洋科学 Marine Science	2	1	3	1	1	1	1	5	3	4	1	2	1	1	1	1	1	1	5	3	5	5	4	3	3	2	2	2	4	4	4	4	4	5	5
93	2	2	19	5	工业设计 Industrial Design	2	1	4	3	4	3	4	4	4	4	4	3	4	4	3	4	3	4	4	3	4	4	3	4	4	3	4	3	4	3	4	3	4	4	4
94	2	2	19	5	交通运输（全英文） Transportation（English）	4	2	2	2	5	2	2	2	2	1	4	2	2	2	4	2	5	4	1	4	4	4	2	4	4	4	2	4	2	4	2	2	4	4	2
95	2	3	20	4	机电技术教育 Electromechanical Technology Education	2	1	4	4	4	4	4	4	4	4	4	4	4	4	4	4	3	4	5	3	3	4	3	4	3	3	2	4	4	3	4	3	4	4	4
96	1	2	18	5	工业设计 Industrial Design	2	1	4	4	4	4	4	4	4	4	4	4	4	4	4	4	4	4	4	4	4	4	4	4	4	4	4	4	4	4	4	4	4	4	4
97	1	6	22	6	材料学 Materials Science	3	1	2	1	2	2	3	4	4	2	4	2	2	4	3	3	4	3	4	4	4	4	4	3	4	4	5	4	3	3	3	4	3	5	4
98	1	7	25	5	船海工程 Marine Science	2	1	2	1	2	3	3	1	2	4	4	3	2	1	2	2	4	2	4	2	2	3	2	2	2	3	2	2	2	2	2	3	3	2	3
99	2	7	25	6	环境微生物 Environmental Microorganisms	2	1	4	3	4	3	4	4	5	4	3	4	4	3	4	4	4	3	3	3	4	4	4	4	3	4	3	4	3	3	3	3	3	3	3
100	2	3	20	4	小学教育 Primary education	2	2	5	3	2	2	3	5	5	5	5	3	5	3	4	4	5	5	3	3	4	4	5	4	4	4	4	4	5	4	4	4	2	5	3
101	2	1	19	4	小学教育 Primary education	2	1	5	4	4	4	3	3	3	4	3	3	3	3	4	4	4	4	3	3	4	4	4	3	3	3	4	3	4	4	3	4	3	3	3
102	1	5	22	4	光学工程 Optical Engineering	5	1	4	2	2	1	3	2	2	4	2	3	2	2	2	4	4	2	2	4	4	3	2	4	4	4	4	4	4	4	2	2	3	4	3
103	2	4	23	4	国际经济与贸易 International Economy and Trading	3	1	5	3	3	4	4	5	5	5	4	5	4	4	4	5	5	5	4	4	4	4	5	4	4	4	5	4	3	3	4	4	4	4	4
104	2	3	22	5	汉语言文学 Chinese Language and Literature	4	1	5	2	1	1	4	4	4	1	3	4	1	4	4	4	4	4	1	1	4	2	3	4	2	2	2	2	4	4	3	3	2	3	3
105	1	4	21	5	机械设计制造 Mechanical Design and Manufacture	1	1	2	1	4	1	3	4	4	2	3	1	2	1	2	2	4	2	4	3	3	4	4	4	4	4	4	4	4	3	2	3	2	4	4
106	1	4	23	4	汉语言文学 Chinese Language and Literature	1	1	5	2	2	4	2	5	4	4	4	4	4	4	2	2	5	5	4	3	5	2	4	3	5	5	4	2	3	3	2	2	2	5	4
107	2	2	19	4	小学教育 Primary education	3	1	5	4	4	4	2	2	4	4	4	4	4	4	4	2	3	4	4	4	4	4	4	4	4	4	4	4	4	4	4	4	4	4	4
108	2	6	24	5	计算机技术 Computer Technology	2	1	5	3	4	4	4	4	4	4	4	3	4	2	4	3	4	4	4	4	4	4	4	4	4	4	3	3	4	4	3	4	4	4	4
109	2	2	19	5	交通运输 Transportation	5	1	3	2	4	2	3	4	4	2	3	3	3	3	4	3	4	4	3	2	4	4	4	3	4	3	2	4	3	3	3	3	3	3	3
110	2	1	19	4	小学教育 Primary education	2	1	4	4	1	1	2	5	1	4	3	3	2	4	4	2	4	4	4	2	4	3	4	4	4	4	4	1	3	2	1	2	4	4	4
111	2	2	18	5	机械设计制造 Mechanical Design and Manufacture	1	1	2	2	4	4	4	4	4	4	4	4	4	4	2	2	2	2	2	2	2	2	2	2	4	2	2	2	2	2	2	4	4	4	4
112	2	1	18	4	小学教育 Primary education	2	1	4	1	1	1	1	5	1	1	5	5	3	1	1	1	2	5	3	1	3	2	1	1	5	5	2	1	5	1	3	1	1	5	5
113	2	1	19	4	小学教育 Primary education	3	1	1	2	2	4	4	4	4	4	2	1	4	4	4	4	4	4	4	4	2	4	4	4	4	5	4	2	4	4	4	4	3	2	4
114	2	3	20	5	机械设计制造 Mechanical Design and Manufacture	1	1	4	3	2	4	4	5	2	4	3	4	2	3	4	4	4	4	3	4	4	4	5	5	4	4	3	2	3	4	2	3	2	3	2
115	2	6	22	5	生物学 Biology	3	1	4	1	4	4	4	4	4	4	5	2	4	5	5	4	5	5	3	5	5	5	5	5	4	5	4	5	4	5	3	5	3	5	3
116	2	2	19	4	小学教育 Primary education	2	2	5	4	2	4	4	4	5	5	3	5	5	5	3	5	5	5	3	5	5	5	5	5	4	4	4	4	3	4	5	5	5	3	5
117	2	1	19	4	小学教育 Primary education	2	2	5	3	2	2	4	5	1	3	3	5	4	1	4	2	2	4	5	4	5	4	2	2	5	5	3	2	5	5	4	4	4	4	3
118	1	4	22	5	软件工程 Software Engineering	2	1	4	2	2	4	3	5	4	3	4	3	2	1	4	4	4	4	3	4	4	4	4	4	4	4	4	5	5	4	3	2	1	5	4
119	2	2	19	4	小学教育 Primary education	1	1	2	4	2	2	2	4	2	4	4	4	4	3	2	2	4	4	2	2	4	4	2	2	4	4	4	4	4	5	4	4	4	4	4
120	2	1	18	4	小学教育 Primary education	2	1	4	3	3	3	3	3	4	3	3	3	3	2	2	2	3	3	3	3	3	4	3	3	4	4	4	2	3	4	3	3	3	3	3
121	1	6	24	6	化学工程 Chemical Engineering	2	1	4	2	2	2	4	4	1	4	5	2	4	3	4	4	4	2	1	4	3	3	2	4	5	5	3	4	3	4	3	2	2	5	4
122	2	1	19	4	小学教育 Primary education	2	1	5	3	4	4	4	4	4	4	4	3	3	4	4	3	4	2	2	4	5	5	4	4	4	4	4	4	3	4	4	4	4	3	4
123	1	3	22	6	生物工程 Biological Engineering	2	1	5	2	3	2	2	4	4	4	4	4	3	1	1	1	3	4	3	2	2	3	2	3	2	2	3	2	4	4	2	3	3	3	3
124	1	5	24	4	计算机技术 Computer Technology	2	1	1	2	1	1	4	4	5	5	2	2	5	5	5	4	5	5	2	5	5	5	4	5	4	2	4	5	2	4	4	4	5	2	4
125	2	2	20	4	小学教育 Primary education	2	3	3	4	5	1	3	4	4	4	4	3	4	2	4	4	5	3	3	5	4	4	5	5	4	4	4	5	3	4	5	5	5	3	4
126	1	4	23	4	信息与计算科学 Information and Computing Science	3	1	2	2	1	2	3	4	1	3	4	3	3	3	1	2	4	3	1	1	3	2	2	2	5	3	3	4	3	4	3	3	3	5	4
127	2	2	19	5	工业设计 Industrial Design	2	1	2	2	3	4	4	5	5	5	4	2	4	5	4	3	3	5	3	5	2	4	4	5	5	5	5	2	4	5	2	4	4	4	4
128	1	4	21	5	软件工程 Software Engineering	3	2	4	2	3	3	3	4	4	3	3	3	3	2	2	4	4	2	4	3	4	4	3	4	4	2	2	3	3	3	2	2	2	3	3
129	2	3	20	4	小学教育 Primary education	2	1	2	4	4	2	3	4	2	4	4	2	4	2	2	3	4	4	2	4	2	4	4	4	4	4	3	4	3	4	4	4	4	2	2
130	1	4	22	5	轮机 Turbine	1	1	4	2	4	4	4	4	4	4	4	4	4	3	3	4	4	4	3	2	4	4	3	4	4	4	4	4	3	4	2	2	2	4	5
131	2	4	21	4	生物技术 Biotechnology	3	1	4	3	3	2	3	3	4	4	3	2	3	2	3	4	4	4	3	4	4	3	4	4	3	4	3	3	3	3	3	3	2	4	3
132	1	5	22	6	生物工程 Biological Engineering	2	1	5	2	4	3	4	4	4	4	4	2	4	4	3	4	4	4	4	3	4	4	3	3	4	4	3	3	5	4	4	2	3	4	2
133	2	4	22	4	工商管理 Business management	3	2	2	4	4	1	5	4	5	2	5	2	4	2	5	5	5	5	2	5	4	4	5	5	5	5	5	3	1	5	5	5	2	5	5
134	2	1	18	4	小学教育 Primary education	2	1	4	2	3	2	4	4	4	2	3	2	4	3	3	4	2	3	4	4	4	4	4	4	4	3	2	4	3	3	4	4	3	3	3
135	2	1	19	4	小学教育 Primary education	2	1	5	3	4	4	4	4	5	5	3	3	4	5	5	5	4	5	3	3	4	4	5	4	4	4	4	3	2	4	4	4	4	2	3
136	1	7	26	5	船舶与海洋工程 Naval Architecture and Ocean Engineering	1	1	4	3	2	2	3	4	4	4	4	3	4	3	4	4	4	4	3	2	2	2	4	4	4	4	4	3	2	3	3	3	4	4	4
137	2	1	18	4	小学教育 Primary education	2	1	5	2	3	3	3	5	1	3	5	5	1	3	1	2	2	5	3	4	4	5	3	3	5	3	3	4	5	5	4	3	3	4	4
138	2	3	21	4	小学教育 Primary education	2	1	4	2	3	3	4	4	1	4	4	4	3	2	4	4	4	4	2	2	4	4	3	3	4	4	4	2	4	4	3	2	2	3	4
139	2	1	18	4	小学教育 Primary education	2	2	5	2	2	5	4	4	4	5	4	4	4	4	4	4	4	5	4	4	5	5	4	5	4	4	4	3	3	4	4	4	4	5	5
140	2	1	18	4	小学教育 Primary education	2	2	4	2	2	2	4	5	1	2	4	5	1	1	2	2	2	2	2	4	2	2	2	2	4	3	2	2	3	4	3	2	2	4	4
141	2	1	18	4	小学教育 Primary education	2	1	3	1	2	2	2	4	2	2	3	1	2	2	2	1	2	2	1	3	3	3	2	3	3	3	2	2	4	3	3	2	3	3	5
142	2	2	20	4	小学教育 Primary education	1	1	5	2	4	2	4	4	2	4	4	2	4	2	3	4	4	4	2	2	3	3	4	4	4	4	4	2	4	4	1	3	4	4	3
143	2	2	19	4	小学教育 Primary education	3	1	4	2	2	4	2	4	5	5	5	5	5	5	5	4	5	5	4	4	4	4	5	5	5	5	5	2	4	4	2	2	4	5	5
144	2	2	19	4	小学教育 Primary education	3	2	4	2	3	4	4	3	2	4	4	3	4	3	3	3	4	4	3	4	3	4	4	4	4	4	3	4	3	4	4	4	3	3	3
145	2	5	22	5	英语口译 English Interpretation	1	1	5	3	1	3	4	4	1	5	3	5	3	2	3	3	4	3	2	2	3	3	1	2	4	3	3	2	3	4	4	3	3	3	3
146	2	3	19	4	交通运输 Transportation	2	1	2	4	2	2	4	2	2	2	3	2	1	1	3	2	2	2	2	2	2	3	2	2	4	4	3	3	4	4	3	4	4	4	2
147	2	1	19	4	小学教育 Primary education	1	2	5	2	4	5	5	2	5	5	3	3	4	3	5	4	5	4	3	5	3	4	5	4	4	4	4	5	3	4	3	3	2	4	4
148	1	4	23	4	信息与计算科学 Information and Computing Science	5	1	5	5	5	2	5	5	5	5	5	5	5	5	5	5	5	5	5	5	5	5	5	5	5	4	5	5	4	5	5	5	5	5	5
149	2	2	20	4	小学教育 Primary education	3	2	5	5	4	5	4	4	5	5	5	5	5	5	5	5	5	5	2	5	5	5	2	5	5	5	5	5	4	3	3	3	3	4	5
150	2	4	21	4	小学教育 Primary education	3	2	3	4	4	2	2	4	4	4	4	4	4	4	4	4	4	4	4	4	4	4	4	4	4	3	4	4	2	4	4	4	2	3	3
151	2	2	19	4	小学教育 Primary education	3	1	4	2	3	1	4	2	1	4	5	2	2	2	2	3	4	4	4	3	4	4	3	4	5	4	4	4	4	4	3	3	4	3	4
152	2	1	18	4	小学教育 Primary education	2	1	4	2	2	2	4	4	2	2	4	4	4	2	2	2	2	4	2	4	4	4	2	4	4	2	4	2	2	4	2	2	2	4	4
153	2	1	17	4	学前教育 Preschool Education	1	1	5	4	3	5	4	5	1	3	5	5	5	3	4	1	4	5	4	3	5	2	3	3	5	5	5	5	5	5	5	5	4	5	5
154	1	5	23	5	软件工程 Software Engineering	3	2	2	3	3	3	4	4	4	4	4	3	4	3	3	4	4	4	3	4	3	4	4	4	3	4	4	3	3	4	3	3	4	4	3
155	2	1	18	4	学前教育 Preschool Education	2	1	5	5	5	1	1	5	3	3	3	3	3	3	3	1	3	5	5	5	5	5	5	5	5	5	5	5	5	5	5	4	3	5	3
156	2	1	20	4	学前教育 Preschool Education	1	1	5	3	4	3	5	3	1	4	4	4	4	4	4	5	5	4	4	3	4	4	4	4	5	5	5	5	3	5	5	4	5	3	3
157	1	5	23	6	应用物理 Applied Physics	3	1	4	1	3	2	3	4	1	4	2	2	2	1	2	4	2	2	2	2	4	3	2	2	4	4	4	4	3	2	2	2	2	4	4
158	1	2	18	5	机械设计制造 Mechanical Design and Manufacture	3	1	4	1	1	2	3	5	3	4	4	5	2	3	2	2	4	2	2	2	3	3	2	2	4	4	3	2	4	3	2	2	2	4	4
159	1	1	18	4	学前教育 Preschool Education	2	1	1	1	2	1	5	3	1	1	4	5	1	1	1	1	1	1	1	2	5	4	3	4	4	4	1	1	4	2	1	3	2	4	2
160	2	1	18	4	学前教育 Preschool Education	1	2	5	3	4	2	4	4	2	3	4	3	3	2	2	3	4	3	2	2	4	4	2	3	4	4	4	3	4	3	2	2	2	4	4
161	2	1	19	4	学前教育 Preschool Education	1	1	2	1	1	2	4	5	1	4	5	5	1	1	1	2	5	5	1	2	5	4	2	2	4	5	1	1	5	3	5	1	1	3	1
162	2	2	19	4	小学教育 Primary education	3	2	5	4	4	5	4	4	5	5	2	2	3	4	4	5	4	2	2	2	2	4	4	5	4	3	2	2	4	4	2	4	4	4	3
163	2	2	18	4	小学教育 Primary education	1	2	3	2	2	2	3	3	2	1	4	4	2	1	3	3	4	4	2	3	4	4	1	1	4	4	3	2	3	4	3	4	2	3	3
164	1	1	18	4	学前教育 Preschool Education	2	1	4	3	4	5	4	5	2	4	3	2	4	2	2	2	2	3	4	2	2	2	2	2	4	3	3	2	4	3	3	2	3	3	4
165	2	4	21	4	小学教育 Primary education	1	1	2	2	2	2	1	1	2	2	1	2	1	1	1	1	1	1	1	1	1	2	2	2	2	2	2	2	2	2	2	2	2	2	2
166	2	1	18	4	学前教育 Preschool Education	1	1	4	2	4	2	4	4	4	4	4	2	2	2	2	2	4	4	4	4	4	4	2	4	4	4	3	4	4	4	2	4	2	4	2
167	2	1	18	4	学前教育 Preschool Education	1	1	3	2	2	2	2	4	2	2	2	4	2	2	1	1	2	3	1	3	4	2	1	1	4	5	2	1	3	2	2	2	3	4	4
168	2	1	18	4	学前教育 Preschool Education	1	2	3	4	4	5	4	5	4	4	4	4	4	4	5	4	4	5	4	5	5	4	5	5	4	5	5	5	4	4	4	4	4	2	2
169	2	1	18	4	学前教育 Preschool Education	1	1	5	1	2	4	1	1	2	2	1	5	5	5	4	1	2	5	1	2	2	2	1	2	5	5	5	2	4	2	2	1	1	5	5
170	2	5	24	5	微生物与生化药学 Microbiology and Biochemical Pharmacy	3	1	4	2	4	3	4	4	3	4	4	4	3	3	3	4	4	4	4	3	4	3	4	3	4	4	3	3	4	4	4	3	2	4	4
171	2	1	18	4	学前教育 Preschool Education	2	2	5	1	1	4	2	5	1	4	5	5	5	4	2	2	4	5	2	1	4	2	2	1	5	5	3	2	4	4	1	1	1	5	5
172	2	1	18	4	学前教育 Preschool Education	1	2	4	2	2	3	3	4	2	2	4	4	2	2	2	2	3	2	2	2	4	4	2	2	4	4	2	2	4	4	3	3	3	3	3
173	2	1	18	4	学前教育 Preschool Education	3	1	4	2	2	4	4	2	1	4	4	4	2	4	2	2	4	4	2	2	2	4	4	4	4	4	4	4	4	4	2	2	3	3	3
174	2	1	18	4	学前教育 Preschool Education	3	1	3	4	4	2	2	4	2	4	2	2	4	3	5	4	4	4	2	2	3	4	4	4	4	4	2	4	3	4	4	4	4	2	4
175	2	4	21	4	教育学 Pedagogy	3	1	5	3	2	4	4	5	4	4	3	2	3	2	4	2	4	2	2	3	4	4	4	4	4	3	4	2	2	4	4	4	4	2	2
176	2	1	19	4	学前教育 Preschool Education	2	1	4	4	1	2	5	5	4	2	2	3	3	3	3	2	2	2	1	3	2	3	4	4	4	3	2	4	2	4	4	4	4	3	3
177	2	4	21	4	小学教育 Primary education	5	1	4	2	3	2	4	5	1	5	5	3	3	1	3	1	5	3	1	2	4	2	3	4	5	5	3	4	2	5	2	2	2	3	4
178	2	2	19	4	小学教育 Primary education	1	1	4	2	4	4	4	3	4	5	3	2	2	4	3	4	4	5	2	3	4	4	3	3	4	4	4	3	4	4	4	4	4	3	4
179	2	1	18	4	学前教育 Preschool Education	4	1	4	1	1	1	3	4	4	3	4	1	1	1	1	1	1	1	1	3	4	4	3	3	4	4	1	1	4	4	4	1	1	4	3
180	1	6	24	6	古典文献学 Classical Philology	3	2	3	3	4	1	3	3	2	2	2	2	4	2	3	2	3	3	3	4	4	4	3	3	2	2	2	2	4	4	3	4	4	3	3
181	2	1	18	4	学前教育 Preschool Education	2	1	5	5	5	1	4	4	2	5	4	2	2	4	4	4	4	1	5	5	5	5	4	4	5	4	5	5	4	4	4	3	3	5	5
182	2	4	21	4	小学教育 Primary education	3	1	4	4	2	1	1	2	1	5	4	4	3	2	4	2	3	2	2	2	3	2	5	5	4	4	2	2	4	4	3	2	3	3	3
183	2	6	23	4	生物学 Biology	4	1	4	4	4	4	3	4	2	4	3	4	3	3	3	4	3	4	3	3	3	3	3	3	3	3	3	3	3	3	3	3	3	3	3
184	2	3	20	4	交通运输 Transportation	3	1	4	2	4	4	4	4	4	4	4	3	4	3	3	4	4	4	3	4	4	4	4	4	4	4	4	4	4	4	4	4	4	4	4
185	2	2	18	5	机电技术教育（师范） Electromechanical Technology Education（Normal）	3	1	5	2	3	1	3	2	5	5	5	5	3	1	3	3	4	2	1	2	2	4	3	4	4	3	4	2	2	3	3	2	3	2	2
186	1	4	23	4	机电技术教育 Electromechanical Technology Education	3	1	5	3	5	4	4	5	5	4	4	2	3	4	4	4	4	4	4	4	4	4	4	4	4	4	4	3	3	3	3	4	2	5	5
187	2	6	23	5	生物学 Biology	3	1	5	2	5	4	4	4	2	5	4	4	2	4	4	4	4	5	2	3	4	4	4	4	4	4	4	3	4	4	4	4	2	3	3
188	2	1	18	4	学前教育 Preschool Education	1	1	5	4	3	4	4	3	2	3	4	2	3	3	2	2	4	4	3	3	4	3	3	4	5	4	3	3	5	4	3	3	3	3	3
189	1	6	23	5	教育技术学 Educational Technology	3	2	4	3	3	2	3	4	2	4	4	3	3	3	3	4	4	3	4	3	3	3	3	3	4	4	4	3	3	4	2	3	3	4	4
190	1	2	20	5	交通运输 Transportation	5	1	4	4	3	3	2	4	4	4	4	3	4	2	4	4	4	4	2	3	4	4	3	4	4	4	4	4	3	4	4	4	4	4	4
191	2	2	19	4	小学教育 Primary education	3	1	4	1	4	4	2	4	4	4	4	3	4	4	2	3	4	4	2	3	4	4	2	3	4	4	4	4	4	4	4	4	4	4	4
192	1	5	24	4	环境工程 Environmental Engineering	2	1	3	2	4	3	4	4	4	4	4	3	3	2	4	4	3	4	2	4	3	2	1	3	4	4	3	3	4	3	3	3	4	4	3
193	2	3	19	5	交通运输 Transportation	2	2	5	5	4	4	4	4	1	4	4	2	2	4	4	4	4	4	4	4	4	4	2	2	4	4	4	4	4	4	4	4	4	2	4
194	2	2	20	4	小学教育 Primary education	4	3	4	3	3	3	4	4	2	4	4	3	4	2	4	2	4	4	2	3	3	4	3	4	4	4	4	4	4	4	3	5	3	3	3
195	1	5	23	4	交通信息工程及控制 Traffic Information Engineering & Control	1	1	5	3	2	2	4	4	2	4	2	5	4	3	3	4	4	4	2	2	4	4	4	4	2	2	4	2	4	4	3	4	4	3	4
196	2	5	23	5	职业技术教育 Vocational and Technical Education	3	2	4	1	2	1	3	4	1	3	2	2	2	2	2	2	4	2	2	3	3	2	2	2	2	2	3	2	3	4	4	2	4	2	4
197	2	3	20	4	小学教育 Primary education	3	1	5	2	2	4	4	4	4	5	4	5	3	2	3	4	4	5	2	2	4	4	2	4	4	3	4	2	4	4	4	4	4	3	3
198	2	6	23	5	职业技术教育 Vocational and Technical Education	2	2	5	3	4	3	3	4	2	4	3	4	3	4	4	4	4	4	2	2	4	4	4	3	4	4	4	4	3	4	4	4	4	4	4
199	1	5	24	6	机械 Mechanical	2	1	4	2	4	3	5	4	5	4	4	3	2	3	5	4	5	2	2	4	4	4	3	2	4	3	4	2	4	4	2	5	2	4	5
200	2	6	25	5	职业技术教育 Vocational and Technical Education	3	1	3	4	2	2	2	4	4	4	4	4	3	3	4	4	4	4	3	3	3	3	3	3	4	4	4	4	4	4	4	4	3	4	4
201	2	6	23	5	教育技术学 Educational Technology	3	1	5	3	2	4	4	4	3	5	4	4	5	3	5	4	5	5	3	5	4	5	5	4	5	4	4	5	3	5	3	5	3	4	5
202	2	6	21	5	教育学 Pedagogy	3	2	5	3	3	5	4	4	1	5	5	3	3	5	3	5	5	5	3	3	3	2	4	4	5	5	5	3	4	5	4	4	3	5	4
203	2	5	25	5	教师教育 Teacher Education	2	1	4	2	3	2	4	3	2	4	2	3	3	2	4	4	4	4	2	3	3	4	4	4	4	3	2	4	3	4	4	4	4	3	3
204	2	6	24	6	学前教育 Preschool Education	1	1	5	3	4	2	3	5	2	4	4	3	3	4	4	4	4	3	3	4	3	3	4	4	4	4	3	3	4	4	3	2	2	4	4
205	2	6	25	5	交通运输 Transportation	3	1	4	3	3	1	4	5	1	5	5	5	1	1	1	1	1	1	3	3	1	4	5	5	4	3	2	2	3	4	3	2	3	4	4
206	2	1	17	4	小学教育 Primary education	5	2	1	1	1	1	1	1	1	1	1	1	1	1	1	1	1	1	1	1	1	1	1	1	3	3	3	3	3	3	3	3	3	3	3
207	1	5	26	6	机电工程 Mechanical and Electrical Engineering	1	1	2	2	2	2	2	2	2	2	2	2	2	2	2	2	2	2	2	2	2	2	2	2	4	4	3	2	3	3	2	3	3	2	3
208	2	5	23	5	学前教育 Preschool Education	3	1	4	4	4	3	4	5	5	5	2	2	4	4	4	4	4	4	4	4	4	4	4	4	4	4	4	4	2	4	4	4	4	2	2
209	2	2	19	3	学前教育 Preschool Education	1	1	5	4	5	3	5	3	5	2	4	2	4	1	5	4	5	5	5	4	5	1	5	5	5	5	5	3	4	3	4	2	2	4	3
210	2	7	24	4	海洋科学 Marine Science	2	2	4	4	4	2	4	4	4	4	3	2	3	2	2	2	4	4	2	2	3	3	3	2	4	4	4	2	4	4	2	2	2	4	4
211	2	2	19	4	小学教育 Primary education	3	1	4	2	4	2	3	4	2	2	3	4	3	2	2	3	4	4	2	2	4	4	2	2	4	3	3	4	3	4	2	4	4	3	3
212	2	4	21	4	小学教育 Primary education	2	1	4	1	2	3	4	5	2	3	4	3	2	4	2	2	4	5	3	2	3	2	4	4	4	4	4	4	4	2	4	4	2	3	4
213	2	2	19	4	小学教育 Primary education	2	1	4	3	3	2	2	5	2	3	4	4	2	2	2	1	3	4	2	2	3	2	4	4	4	4	3	3	3	2	2	2	2	4	4
214	2	6	24	4	机电工程 Mechanical and Electrical Engineering	3	1	3	3	4	3	3	4	4	4	4	3	3	3	4	4	4	4	3	3	3	4	4	4	3	3	3	3	3	3	3	3	3	3	3
215	2	2	19	4	机电工程Mechanical and Electrical Engineering	3	1	4	2	2	2	4	4	4	3	2	4	4	2	4	4	4	4	2	2	4	4	4	4	4	3	2	4	3	4	2	2	4	2	2
216	2	5	23	5	机电工程 Mechanical and Electrical Engineering	2	1	5	3	5	5	5	5	5	5	5	2	3	1	2	1	3	2	2	4	5	5	5	5	5	5	4	2	4	5	2	5	5	5	3
217	2	1	18	4	Mechanical and Electrical Engineering	1	1	4	4	4	4	4	5	4	4	4	4	4	2	3	2	2	3	2	3	3	3	3	3	4	4	4	3	4	2	2	2	2	5	4
218	1	5	23	6	工业设计 Industrial Design	2	1	4	3	3	3	3	4	4	4	4	4	4	4	3	4	4	4	3	3	4	3	3	3	4	4	4	2	3	4	4	3	2	3	3
219	2	3	19	5	交通运输 Transportation	2	2	4	2	2	2	4	5	1	4	4	3	2	1	2	4	4	4	5	2	4	4	1	1	4	4	4	4	2	4	2	2	2	3	4
220	2	5	24	5	计算机科学与技术 Computer Science and Technology	1	1	4	2	4	4	4	4	4	4	4	4	4	4	2	4	4	4	2	2	4	4	3	3	4	4	4	4	4	4	4	4	4	4	4
221	2	3	21	5	财务会计教育 Financial Accounting Education	1	1	4	2	2	2	4	5	1	4	4	4	2	2	3	4	4	4	2	2	4	4	2	2	3	3	2	2	2	4	2	4	4	4	4
222	2	2	20	4	交通运输 Transportation	4	1	4	4	4	4	4	4	4	4	4	3	2	2	2	3	3	2	1	2	4	3	4	2	4	4	4	4	4	3	3	3	3	3	3
223	2	2	20	5	应用电子技术教育 Applied Electronic Technology Education	1	1	4	3	2	2	3	4	5	3	2	3	2	1	4	3	4	2	1	1	4	4	3	4	4	4	2	4	2	4	4	4	3	3	4
224	1	6	26	4	机电工程 Mechanical and Electrical Engineering	3	1	3	3	3	3	3	3	3	3	3	3	3	3	3	3	3	3	3	3	3	3	3	3	3	4	3	2	4	3	2	4	2	4	3
225	2	1	18	4	小学教育 Primary education	3	2	5	3	4	4	2	4	4	4	4	2	4	4	2	2	4	2	3	2	4	4	4	4	4	4	4	4	4	4	4	2	4	4	2
226	1	3	20	5	机械设计制造 Mechanical Design and Manufacture	1	1	5	1	5	1	2	2	4	4	3	2	3	2	3	4	4	3	2	1	4	3	4	3	4	4	1	1	2	4	2	4	4	4	5
227	1	1	19	4	小学教育 Primary education	1	1	4	2	4	4	4	2	1	5	3	2	4	4	1	4	4	5	3	1	4	4	1	2	4	4	4	4	5	2	2	4	3	3	3
228	2	6	23	5	小学教育 Primary education	2	2	5	4	5	1	3	4	1	4	4	4	2	2	3	3	2	5	2	1	4	4	5	3	4	5	5	2	4	4	3	2	4	4	2
229	2	1	18	4	小学教育 Primary education	3	2	3	3	3	4	2	4	1	3	3	3	3	3	3	3	3	2	2	3	3	3	3	3	4	4	4	3	3	3	3	3	3	3	3
230	2	2	19	2	学前教育 Preschool Education	3	1	5	4	4	4	4	4	4	4	3	3	4	3	5	4	5	4	3	5	4	5	5	5	5	2	3	3	2	4	4	4	4	3	2
231	2	6	24	5	机电工程 Mechanical and Electrical Engineering	3	2	3	1	1	1	3	4	4	4	1	1	3	1	3	4	4	4	2	3	3	3	4	4	3	3	3	2	2	4	1	4	4	4	3
232	2	2	19	4	小学教育 Primary education	2	1	3	3	3	3	3	3	3	3	3	4	4	4	4	4	4	5	4	4	4	4	4	4	5	5	5	5	3	4	4	4	4	4	4
233	2	2	19	4	小学教育 Primary education	3	1	5	3	3	3	4	5	4	5	4	3	4	3	4	4	4	3	2	3	4	3	4	3	4	3	4	2	3	4	4	3	3	3	4
234	1	2	20	5	文化产业管理 Cultural Industry Management	2	2	5	3	5	5	3	5	5	5	5	3	4	4	4	4	4	4	4	3	4	4	3	3	5	5	5	5	5	4	3	3	3	5	5
235	2	3	20	4	小学教育 Primary education	3	1	5	2	4	3	2	4	2	4	4	3	4	4	4	4	4	4	4	4	4	4	4	4	4	4	4	5	4	5	4	4	4	3	3
236	1	2	19	4	工商管理 Business management	1	1	4	4	4	4	1	4	4	3	4	4	4	3	2	3	4	4	4	3	3	4	3	3	4	4	4	4	4	4	4	4	2	4	5
237	1	6	24	5	职业技术教育 Vocational and Technical Education	2	2	3	4	4	3	4	4	3	3	4	3	4	4	4	4	3	3	3	4	4	3	2	4	4	4	4	3	4	3	3	3	3	4	3
238	2	2	18	5	交通运输 Transportation	2	1	5	1	1	4	3	5	4	5	5	5	2	4	3	4	4	4	4	2	1	1	4	4	5	5	2	3	4	4	1	5	3	4	2
239	1	5	24	4	计算机技术 Computer Technology	3	2	3	1	1	1	5	5	3	3	3	3	3	3	3	3	3	3	3	3	3	3	3	3	3	3	3	3	3	3	3	3	3	3	3
240	1	6	24	5	机电工程 Mechanical and Electrical Engineering	2	2	4	2	2	2	3	4	2	2	4	2	2	2	3	4	4	4	2	4	4	2	4	4	4	4	3	2	4	4	3	2	2	4	4
241	1	2	20	4	交通运输 Transportation	2	2	1	1	1	1	1	1	1	1	1	1	1	1	1	1	1	1	1	2	3	4	3	2	1	2	3	1	3	2	1	3	2	1	1
242	2	6	25	5	教育学 Pedagogy	2	1	2	2	4	1	2	5	1	1	4	4	2	1	3	1	2	1	2	2	3	2	2	2	4	4	1	1	2	4	3	2	2	4	2
243	2	1	18	4	小学教育 Primary education	2	1	4	2	2	2	2	4	2	4	4	3	4	4	2	2	4	2	2	4	4	4	2	3	4	4	4	4	4	4	2	2	2	4	4
244	1	2	20	5	交通运输（全英文） Transportation（English）	5	2	4	2	2	2	2	4	2	3	4	4	2	2	3	3	5	5	5	3	2	4	3	3	4	4	3	2	3	4	2	3	2	4	4
245	2	1	18	4	小学教育 Primary education	1	2	4	4	3	3	2	4	4	3	4	4	3	4	3	3	4	4	3	4	4	4	3	3	4	3	4	4	4	3	3	3	4	3	3
246	2	2	20	5	工业设计 Industrial Design	4	1	5	5	4	4	4	3	4	4	3	4	3	4	3	4	4	4	3	3	4	4	3	3	4	4	3	4	3	4	3	4	4	3	3
247	2	3	20	4	小学教育 Primary education	3	1	4	3	4	4	4	4	2	4	3	2	4	3	4	4	4	2	2	3	4	4	2	4	4	3	4	2	3	4	4	4	4	3	2
248	2	2	20	4	小学教育 Primary education	4	1	5	3	2	3	2	4	3	5	5	5	5	2	4	4	5	4	2	4	4	4	5	4	4	3	2	2	2	4	3	4	2	3	3
249	2	2	19	5	交通运输（全英文） Transportation（English）	2	1	5	2	4	2	1	4	4	5	3	1	4	4	4	4	4	4	2	1	4	4	1	1	5	5	4	1	1	1	4	3	5	2	5
250	1	3	21	4	机械 Mechanical	4	1	3	3	3	3	3	3	3	3	3	3	3	3	3	3	3	3	3	3	3	3	3	3	3	3	3	3	3	3	3	3	3	3	3
251	2	2	20	4	小学教育 Primary education	3	2	4	4	4	3	3	5	2	5	4	5	3	3	4	2	5	4	4	3	5	3	3	3	5	5	5	4	5	5	5	4	2	5	5
252	2	6	27	4	职业技术教育 Vocational and Technical Education	2	1	3	2	4	2	3	4	2	2	3	3	2	2	3	2	4	3	2	3	3	4	4	2	3	4	2	3	3	3	2	3	3	3	3
253	2	2	20	4	机械设计制造 Mechanical Design and Manufacture	3	1	5	4	4	2	1	5	5	4	4	4	4	2	3	4	4	5	4	4	4	4	4	4	4	4	4	4	4	4	4	4	4	4	4
254	2	1	18	5	交通运输 Transportation	2	1	2	4	4	2	4	4	4	4	4	4	4	2	5	5	5	4	5	5	4	4	4	4	2	4	2	4	4	4	4	4	4	5	4
255	2	2	18	5	交通运输 Transportation	4	1	5	4	4	3	4	3	2	4	4	4	4	2	3	4	4	2	4	2	4	4	4	4	4	4	4	4	3	4	4	2	4	4	3
256	2	3	20	2	计算机信息管理 Computer Nnformation Management	1	1	4	2	3	2	3	4	4	4	4	3	3	2	2	2	4	4	2	2	4	4	2	2	4	4	4	3	4	4	3	3	3	3	4
257	1	7	25	5	机电工程 Mechanical and Electrical Engineering	4	1	3	2	2	2	4	4	4	3	3	3	2	3	3	3	4	4	3	4	4	4	4	3	3	3	3	3	4	4	4	4	3	4	3
258	2	5	19	4	小学教育 Primary education	3	1	3	4	2	2	4	4	2	2	4	4	4	2	2	2	4	2	2	3	2	4	2	2	1	5	2	4	4	4	2	4	3	4	3
259	2	2	19	5	交通运输（全英文） Transportation（English）	2	1	5	5	5	5	5	5	5	5	5	3	3	5	2	1	4	4	4	2	4	4	3	3	5	3	5	4	3	4	2	3	2	4	4
260	2	6	22	6	生物化工 Biochemical	4	2	4	4	2	1	2	4	4	4	4	4	3	2	2	3	4	2	2	3	4	4	2	2	4	4	4	4	4	4	3	4	3	4	4
261	1	7	22	5	机电工程 Mechanical and Electrical Engineering	3	1	4	2	2	3	4	4	2	4	4	2	2	2	3	4	4	2	4	4	4	4	4	4	4	2	3	2	4	2	4	4	3	4	4
262	2	1	19	5	交通运输（全英文） Transportation（English）	2	1	2	4	4	2	4	5	4	5	3	4	4	3	4	5	5	5	4	5	3	5	5	5	4	3	4	2	3	4	5	4	4	4	3
263	1	3	21	4	小学教育 Primary education	4	1	4	2	2	2	4	4	2	2	4	4	2	2	2	2	4	2	2	3	4	3	3	3	4	4	2	2	3	4	2	3	2	4	3
264	1	6	23	6	计算机应用技术 Computer Application Technology	5	1	5	2	1	3	2	4	1	3	4	5	2	2	3	5	4	5	5	3	5	4	5	3	5	3	4	3	3	3	4	4	5	4	3
265	2	5	25	5	质量工程与管理 Quality Engineering and Management	1	1	3	1	1	4	2	5	4	3	5	3	1	2	2	4	5	5	1	2	4	2	4	4	5	5	4	2	4	2	1	1	2	4	4
266	2	2	19	4	小学教育 Primary education	2	2	5	2	4	4	2	4	4	4	3	2	4	4	4	2	4	4	4	4	4	4	5	5	5	5	5	5	4	4	4	4	4	3	3
267	2	7	25	5	职业教育 vocational education	4	1	3	1	2	1	4	4	2	2	3	2	3	1	1	1	5	4	2	3	4	4	4	4	4	4	3	2	2	4	3	4	3	5	5
268	2	2	19	4	小学教育 Primary education	3	1	3	5	3	4	3	5	5	4	4	3	3	2	3	2	4	3	4	3	4	4	3	4	3	3	3	4	3	4	2	3	4	3	4
269	2	7	25	6	教师教育 Teacher Education	4	2	4	3	2	4	5	4	4	4	3	2	2	4	4	4	4	5	4	4	4	4	5	4	4	4	3	2	3	4	2	4	4	3	2
270	2	7	25	5	教育学 Pedagogy	1	2	4	2	4	2	4	4	2	2	4	4	2	2	2	2	4	4	4	3	4	4	3	2	4	3	4	4	4	4	4	4	4	4	3
271	2	7	27	5	职业技术教育 Vocational and Technical Education	3	1	2	3	4	3	4	4	4	5	3	2	4	3	3	3	4	4	2	4	4	4	4	4	4	4	3	4	2	4	2	4	4	4	4
272	2	6	23	3	职业教育 vocational education	1	1	4	3	3	4	3	5	5	5	3	3	5	2	4	4	4	4	3	4	3	4	4	4	4	3	4	3	3	4	4	4	3	3	3
273	2	6	24	4	机电工程 Mechanical and Electrical Engineering	2	2	5	3	2	2	3	4	4	5	3	3	3	3	3	3	4	2	3	2	2	3	2	2	3	4	3	3	3	3	3	3	3	3	3
274	2	3	19	5	机电技术教育 Electromechanical Technology Education	1	1	4	4	4	4	4	4	4	4	4	3	4	4	2	2	2	2	2	2	2	2	2	2	4	4	4	4	4	3	3	2	2	3	3
275	2	2	20	4	小学教育 Primary education	3	3	4	4	3	4	2	4	3	3	4	4	4	3	3	4	2	3	2	2	2	3	2	2	4	3	3	3	4	4	3	4	2	4	3
276	1	4	22	4	机电技术教育 Electromechanical Technology Education	2	2	4	3	3	3	3	3	3	3	3	3	3	3	3	3	3	3	3	3	3	3	3	3	5	5	5	5	5	5	3	4	3	2	3
277	2	3	20	5	机电技术教育 Electromechanical Technology Education	1	2	5	4	4	4	4	2	4	4	2	4	3	4	4	4	4	3	4	3	4	3	4	3	4	4	4	4	4	4	3	4	4	4	4
278	2	6	24	5	职业技术教育 Vocational and Technical Education	2	1	5	1	3	1	2	1	4	4	2	1	2	2	2	4	4	3	2	4	3	4	4	3	4	4	3	2	4	3	1	2	2	4	4
279	2	2	20	4	小学教育 Primary education	2	1	5	3	5	4	4	4	5	4	5	3	4	3	3	2	4	4	4	3	4	4	3	3	4	4	4	3	4	5	5	4	5	4	5
280	2	4	21	4	小学教育 Primary education	3	2	5	4	4	5	4	5	5	5	2	2	3	5	2	5	5	5	2	2	5	5	5	2	4	2	5	2	2	4	2	2	2	5	5
281	1	3	20	5	机电技术教育 Electromechanical Technology Education	3	2	4	4	4	4	4	4	4	4	4	2	2	2	4	4	4	4	4	4	4	4	4	4	4	4	4	4	3	4	4	4	4	4	4
282	2	1	18	4	职业教育 vocational education	5	1	5	3	4	4	3	4	5	4	3	1	4	2	4	4	2	4	4	2	4	4	5	3	4	3	4	4	2	4	2	2	2	3	2
283	2	2	19	5	交通运输 Transportation	3	1	1	1	2	1	2	4	3	1	2	2	4	2	2	4	4	4	2	3	2	2	3	4	4	4	4	4	3	4	4	4	4	3	3
284	2	6	22	6	环境科学与工程 Environmental Science and Engineering	2	1	4	3	3	2	4	4	3	4	4	4	2	2	2	4	4	4	2	3	4	3	3	3	4	4	3	3	2	4	3	3	3	3	3
285	2	3	20	4	食品质量与安全 Food Quality and Safety	2	1	5	4	5	4	3	5	5	4	5	5	5	4	3	3	4	3	4	3	4	4	4	5	5	5	5	5	4	5	4	4	3	4	4
286	2	7	26	5	机械 Mechanical	1	2	1	1	1	1	1	1	1	1	1	1	1	1	1	1	1	1	1	1	1	1	1	1	1	1	1	1	1	1	1	1	1	1	1
287	1	2	19	5	交通运输 Transportation	3	2	5	3	2	2	2	5	5	5	5	4	4	5	4	5	5	1	2	1	4	4	3	4	5	5	5	5	4	5	4	4	4	3	5
288	2	7	25	6	教育学 Pedagogy	5	2	1	5	1	1	2	1	4	1	1	4	1	1	4	4	4	5	2	1	5	5	5	5	1	2	1	2	4	4	3	1	5	2	2
289	2	7	25	5	环境工程 Environmental Engineering	2	1	5	3	2	1	3	4	5	4	2	2	4	2	2	2	3	4	2	2	3	2	2	2	3	3	4	2	2	2	4	4	2	3	2
290	2	1	18	4	学前教育 Preschool Education	3	1	5	4	2	3	4	4	2	3	3	3	2	2	3	2	4	3	2	3	3	2	4	4	4	4	3	4	3	4	2	4	2	4	4
291	2	2	19	4	视觉传达设计 Visual Communication Design	4	1	4	3	4	2	4	4	1	2	4	5	4	2	2	4	2	2	2	4	5	5	2	2	2	3	2	4	4	2	3	4	2	4	2
292	2	6	25	6	职业技术教育 Vocational and Technical Education	3	2	5	4	3	4	4	4	4	4	4	3	3	4	4	4	4	4	3	3	3	4	3	3	3	4	4	4	4	4	4	4	4	3	3
293	2	1	18	4	学前教育 Preschool Education	2	1	4	3	4	4	4	5	2	5	3	1	3	2	2	1	4	4	2	1	4	2	3	3	4	3	4	3	3	4	3	2	2	3	4
294	2	4	21	4	小学教育 Primary education	4	1	4	3	4	2	2	4	4	4	3	4	2	2	4	4	4	3	2	4	3	4	5	4	4	4	3	3	4	4	3	4	4	2	2
295	1	4	21	5	车辆工程 Vehicle Engineering	3	2	3	2	4	2	2	4	5	4	2	3	5	3	4	5	5	5	3	4	4	4	5	4	4	4	4	3	2	4	3	4	4	3	3
296	1	2	20	4	交通运输 Transportation	3	1	4	4	4	4	4	4	4	4	2	3	3	4	3	4	4	3	3	2	3	4	3	2	4	3	4	4	3	4	4	3	3	2	3
297	2	4	21	4	体育教育 Physical Education	1	2	4	4	4	4	4	4	5	4	5	4	4	4	4	4	4	4	4	4	4	4	5	4	4	4	4	4	4	4	4	4	4	4	4
298	2	6	24	5	车辆工程 Vehicle Engineering	2	1	5	4	5	2	4	5	4	5	5	4	2	3	2	2	4	2	2	2	4	2	3	4	5	4	4	2	4	4	2	2	2	4	3
299	1	4	21	5	食品质量与安全 Food Quality and Safety	4	2	5	4	4	4	2	4	5	4	4	2	3	2	2	4	4	4	2	2	4	3	2	2	4	4	4	4	3	4	2	4	2	4	3
300	1	3	22	4	机电技术教育 Electromechanical Technology Education	1	1	1	1	1	3	1	1	1	1	1	1	1	1	1	1	1	1	1	1	1	1	1	1	1	1	1	1	1	1	1	1	1	1	1
301	1	4	22	4	航海技术车辆工程 Vehicle Engineering	3	1	2	4	4	2	4	4	2	2	4	4	4	2	2	2	2	2	2	2	4	4	2	4	4	4	4	4	2	4	2	4	2	4	4
302	2	3	20	4	交通运输（全英文） Transportation（English）	2	2	5	5	5	1	4	4	5	5	5	5	5	5	2	4	5	4	1	1	5	5	4	2	5	5	4	1	3	4	2	4	2	4	4
303	2	4	21	4	体育教育 Physical Education	1	2	4	2	4	2	3	4	1	3	2	4	3	1	2	3	4	4	2	4	4	4	3	2	4	4	3	4	4	3	4	3	4	3	3
304	1	2	19	4	生物技术 Biotechnology	4	1	4	1	4	4	5	5	4	4	4	5	4	4	4	5	2	4	2	5	5	5	4	5	4	4	4	4	3	4	4	4	3	4	4
305	2	1	18	4	车辆工程 Vehicle Engineering	3	2	4	2	2	1	2	4	4	4	4	4	4	1	2	4	4	4	1	4	4	4	4	4	4	4	4	4	4	3	2	4	3	4	4
306	2	2	19	4	小学教育 Primary education	2	1	5	3	4	2	4	5	3	5	3	3	4	2	2	4	4	3	2	2	4	4	2	4	4	4	4	3	4	4	4	4	4	4	3
307	1	6	25	5	车辆工程 Vehicle Engineering	2	1	3	1	2	1	4	5	1	2	2	2	1	1	3	1	4	1	1	1	1	2	3	4	3	4	2	1	3	4	3	2	1	3	4
308	2	6	24	5	教育学 Pedagogy	1	2	5	4	1	4	3	5	1	5	2	2	2	2	2	4	4	2	5	2	4	4	2	4	4	4	4	2	2	4	4	3	4	2	4
309	1	6	25	6	环境工程 Environmental Engineering	3	2	5	2	2	2	2	5	1	4	4	4	2	2	2	4	4	4	4	3	4	4	3	4	5	5	5	5	3	4	5	3	2	5	5
310	1	2	19	6	材料科学与工程 Materials Science and Engineering	1	2	4	1	4	2	3	4	4	4	3	4	2	2	2	2	4	4	1	2	3	4	2	3	4	4	4	4	4	4	3	4	3	4	4
311	2	6	25	6	职业技术教育 Vocational and Technical Education	3	2	4	2	3	3	4	4	4	4	3	4	3	3	3	3	4	4	3	4	4	3	4	3	4	3	4	4	2	4	3	4	2	4	4
312	2	1	18	4	材料科学与工程 Materials Science and Engineering	3	1	5	3	3	3	3	5	5	5	4	2	4	3	3	2	5	4	2	3	4	4	3	3	4	4	3	3	3	4	3	3	3	3	3
313	2	6	23	6	交通运输 Transportation	2	2	4	1	4	2	4	4	1	4	3	4	3	2	2	3	4	3	2	2	3	3	3	3	3	4	2	4	3	2	3	2	2	4	5
314	2	6	26	5	环境科学与工程 Environmental Science and Engineering	3	1	4	2	2	2	4	3	4	4	4	2	2	2	4	2	2	4	2	2	2	2	2	2	4	2	4	2	4	4	2	2	4	2	2
315	2	6	24	4	生物化学与分子生物学 Biochemistry and Molecular Biology	3	1	4	1	1	1	4	4	4	3	3	3	2	2	4	2	4	2	2	2	2	2	3	2	2	2	3	2	3	2	3	2	2	3	2
316	2	6	25	5	职业技术教育 Vocational and Technical Education	3	1	5	2	1	5	4	4	1	5	5	5	5	5	5	5	5	5	4	5	5	5	5	5	5	5	5	4	3	5	5	5	5	3	4
317	2	1	19	5	交通运输 Transportation	2	2	4	4	2	2	2	4	2	4	4	4	2	2	2	2	2	4	4	2	4	4	2	2	4	4	3	4	4	2	2	3	2	3	3
318	2	3	19	4	小学教育 Primary education	1	1	5	2	3	3	4	5	1	4	4	5	1	1	2	3	4	5	3	2	4	4	3	3	5	5	5	2	3	4	4	3	2	5	5
319	2	6	24	5	环境科学与工程 Environmental Science and Engineering	3	1	2	2	3	1	4	4	4	3	3	4	2	2	2	2	2	2	2	2	3	4	2	2	4	4	3	2	4	4	2	2	3	4	4
320	1	1	18	4	小学教育 Primary education	3	1	4	1	1	1	3	5	2	2	1	1	2	1	2	3	5	2	4	1	2	3	2	2	4	4	4	4	5	3	1	1	2	5	4
321	1	4	21	4	生物化学与分子生物学 Biochemistry and Molecular Biology	3	2	4	4	4	2	3	4	4	2	3	2	4	2	2	2	4	4	2	2	2	3	2	2	3	4	2	4	4	4	2	3	4	4	4
322	2	1	19	4	小学教育 Primary education	2	1	4	3	4	1	3	4	2	4	4	4	3	3	4	3	4	4	3	3	3	4	4	4	4	3	2	3	4	4	4	3	4	3	3
323	2	6	22	5	学前教育 Preschool Education	1	2	5	3	2	4	4	5	4	2	5	5	5	3	4	4	4	5	4	3	5	4	5	4	4	5	4	4	4	5	2	5	1	5	5
324	2	2	19	4	小学教育 Primary education	5	1	4	4	3	4	4	4	4	4	3	3	3	3	4	4	4	4	4	4	4	4	4	4	3	3	3	3	3	3	3	3	4	4	4
325	2	1	19	4	学前教育 Preschool Education	3	1	4	3	3	4	4	4	4	4	4	4	4	2	3	3	2	3	3	2	4	3	2	3	4	4	2	2	3	2	3	2	2	4	4
326	2	2	20	4	生物化学与分子生物学 Biochemistry and Molecular Biology	2	1	4	4	2	1	2	5	2	2	4	4	2	2	2	2	2	4	4	2	4	2	3	3	4	3	3	3	4	4	4	3	2	3	5
327	2	3	21	4	生物化学与分子生物学 Biochemistry and Molecular Biology	2	1	5	5	4	3	3	4	3	3	3	3	2	3	3	4	4	3	4	3	3	3	4	4	4	4	2	4	2	4	2	3	3	3	3
328	2	3	20	4	小学教育 Primary education	3	1	3	2	1	4	3	4	4	4	4	2	4	3	2	4	3	3	3	4	4	3	3	4	4	3	4	3	4	4	4	3	2	3	4
329	2	6	23	6	生物化学与分子生物学 Biochemistry and Molecular Biology	2	1	3	4	1	1	1	4	4	4	3	1	4	1	1	1	5	4	1	4	4	1	4	4	1	5	1	1	5	2	1	1	1	4	4
330	2	5	25	4	职业技术教育 Vocational and Technical Education	3	2	4	3	4	2	3	5	2	3	4	4	4	2	3	3	4	3	3	3	3	3	3	3	4	4	4	4	4	4	4	4	4	4	4
331	2	4	20	4	生物技术 Biotechnology	2	1	2	2	2	3	2	4	2	4	3	4	4	3	2	2	4	4	2	2	2	2	4	4	3	4	2	2	3	4	2	2	2	4	4
332	2	2	20	5	环境科学 Environmental Science	1	1	4	4	4	3	4	4	4	4	4	2	2	2	2	2	4	3	2	4	4	3	2	2	4	4	4	4	4	4	4	4	4	3	4
333	1	3	20	6	环境科学 Environmental Science	1	1	4	3	4	2	4	5	2	4	4	4	4	4	2	4	4	4	4	4	4	4	4	4	4	4	4	4	4	4	4	4	4	4	4
334	1	6	25	4	特殊教育学 Specila Pedagogy	3	1	4	2	4	3	3	4	2	4	3	2	2	2	4	4	4	4	2	4	4	3	4	4	3	2	3	2	4	4	4	4	3	4	3
335	1	2	19	6	环境科学 Environmental Science	2	2	4	3	3	4	3	3	3	3	3	3	3	3	3	3	3	3	3	3	3	3	3	3	3	3	3	3	3	3	3	3	3	3	3
336	2	7	27	6	环境科学与工程 Environmental Science and Engineering	2	1	1	4	4	1	4	4	2	3	4	1	4	1	2	2	4	4	2	4	3	4	4	4	4	4	3	3	2	4	4	4	4	2	2
337	1	2	18	4	机械 Mechanical	5	1	4	2	5	3	4	5	1	4	4	5	1	3	3	3	3	3	3	3	3	3	3	3	3	3	3	3	3	3	3	3	3	3	3
338	1	2	20	6	环境科学 Environmental Science	1	1	5	5	5	3	4	5	5	5	5	5	5	5	5	5	5	5	5	5	5	5	5	5	5	5	5	5	5	5	5	5	5	5	5
339	2	1	18	4	小学教育 Primary education	2	1	4	4	2	2	2	5	1	2	4	1	2	2	1	2	4	5	4	4	4	4	2	3	5	4	4	1	4	2	2	2	1	5	5
340	1	7	25	5	教育学 Pedagogy	1	1	3	4	4	1	3	3	4	4	4	2	5	4	2	2	4	4	4	2	4	4	3	2	4	4	4	4	4	5	3	4	2	4	5
341	2	2	19	6	化学工程 Chemical Engineering	1	1	2	2	2	2	2	4	1	4	4	2	4	2	2	2	4	3	2	4	3	4	2	4	3	3	3	3	3	3	3	3	3	3	3
342	1	6	25	5	环境科学 Environmental Science	2	1	3	1	2	1	3	4	1	1	1	4	2	1	3	3	3	3	2	2	2	2	2	2	2	3	2	1	4	3	2	2	4	3	2
343	2	1	18	4	小学教育 Primary education	4	2	4	2	5	2	4	2	2	4	2	2	2	2	2	4	4	5	2	3	2	3	3	4	4	3	2	3	4	1	1	2	4	4	4
344	2	6	24	5	学前教育 Preschool Education	2	1	2	1	4	4	4	4	5	5	2	1	2	2	4	4	4	4	4	4	4	4	2	2	4	2	2	2	1	4	4	4	2	2	2
345	2	2	17	4	环境科学 Environmental Science	2	1	5	2	4	5	5	2	2	5	2	2	5	5	4	4	5	5	5	5	5	5	5	5	2	5	5	5	3	5	5	5	4	2	2
346	2	6	23	5	学前教育 Preschool Education	3	1	4	4	2	3	4	4	4	4	4	4	2	2	3	2	4	2	4	2	4	4	4	4	4	4	4	4	4	4	4	3	2	4	4
347	2	5	22	5	发展与教育心理学 Developmental and Educational Psychology	1	1	5	2	2	1	1	4	1	5	5	1	5	1	1	4	5	5	1	1	4	4	5	5	4	4	5	5	1	4	5	5	5	2	2
348	1	4	21	4	环境工程 Environmental Engineering	2	2	4	2	2	2	3	4	4	2	4	4	4	2	2	2	4	4	3	4	4	4	4	4	3	2	2	2	3	4	3	3	4	3	2
349	2	1	19	5	环境科学 Environmental Science	3	1	4	4	3	4	4	4	2	4	4	4	4	5	4	4	4	5	4	5	4	5	4	4	5	5	5	5	3	4	4	4	4	3	2
350	2	2	20	5	交通运输 Transportation	3	2	5	2	5	5	3	5	5	5	5	2	2	2	2	5	5	4	2	3	5	4	5	5	5	5	2	2	2	4	4	4	2	4	4
351	2	5	23	4	机电工程 Mechanical and Electrical Engineering	3	1	4	3	3	2	4	4	1	4	4	2	3	2	3	4	4	4	2	4	4	3	4	4	3	2	2	3	2	4	4	4	2	3	2
352	1	7	25	6	环境科学 Environmental Science	2	2	4	4	4	4	4	5	5	5	5	5	5	4	4	4	5	4	4	1	4	4	5	5	5	4	4	5	5	5	5	5	5	5	5
353	2	1	18	4	小学教育 Primary education	2	1	5	3	2	4	4	5	4	4	4	2	2	4	3	4	4	4	4	4	4	2	2	2	4	4	4	2	3	4	4	2	1	4	3
354	1	4	21	4	环境科学 Environmental Science	2	1	2	2	2	2	3	4	5	1	4	2	2	2	2	4	3	2	2	3	4	5	4	4	4	4	4	4	4	3	3	4	4	4	4
355	2	4	22	5	交通运输 Transportation	1	2	5	2	2	2	2	4	4	4	5	2	2	2	1	4	4	4	4	1	4	1	1	1	5	5	5	5	5	1	1	1	1	5	5
356	1	4	22	6	风景园林 landscape Garden	4	1	4	2	2	4	3	4	2	4	4	4	2	1	3	4	4	3	4	3	3	3	4	4	4	4	3	2	4	4	2	3	2	2	2
357	2	6	23	5	教育学 Pedagogy	1	1	4	3	2	1	2	3	4	3	4	3	3	2	4	3	5	4	4	2	4	4	5	4	4	4	4	3	4	4	2	2	3	4	4
358	1	6	23	5	学前教育 Preschool Education	3	1	4	4	4	4	4	4	4	4	4	4	4	4	4	4	4	4	4	4	4	4	4	4	4	4	4	4	4	4	4	4	4	4	4
359	2	4	21	4	风景园林 landscape Garden	4	1	5	3	3	4	5	5	4	5	5	3	3	5	5	5	5	5	5	5	4	4	5	5	4	5	5	5	1	4	4	4	3	2	1
360	2	3	19	4	交通运输（全英文） Transportation（English）	2	1	4	4	2	4	4	5	2	4	4	4	2	3	1	1	4	5	4	4	4	4	3	2	4	4	4	4	4	4	2	2	2	4	4
361	2	5	24	5	职业技术教育 Vocational and Technical Education	2	1	4	4	4	4	4	4	4	4	4	4	4	4	4	4	4	4	4	4	4	4	4	4	4	4	4	4	4	4	4	4	4	4	4
362	2	6	24	5	学前教育 Preschool Education	3	1	4	4	5	3	3	4	2	4	4	3	3	3	2	2	4	4	4	3	3	4	3	3	5	5	5	5	4	4	4	4	4	5	5
363	2	1	18	4	小学教育 Primary education	3	1	3	1	3	3	4	2	1	2	3	2	3	3	3	3	3	3	3	2	4	3	3	2	3	3	2	3	3	3	2	3	3	3	3
364	2	1	18	5	风景园林 landscape Garden	2	2	4	2	4	3	3	4	2	2	3	4	4	2	2	2	4	5	2	3	4	3	2	2	4	4	4	4	3	4	1	4	2	4	4
365	2	1	18	4	小学教育 Primary education	5	2	5	1	5	5	5	1	1	5	5	1	1	5	5	5	5	5	5	5	5	5	5	5	5	5	5	5	3	3	3	3	3	3	3
366	2	2	20	5	机械设计制造 Mechanical Design and Manufacture	2	2	4	3	4	3	4	4	3	4	4	4	4	4	3	3	3	3	4	4	4	4	4	3	4	4	3	3	4	3	4	3	4	3	4
367	2	1	18	4	小学教育 Primary education	1	1	4	1	2	4	4	5	4	5	3	4	5	2	4	1	4	5	2	2	5	5	2	4	4	3	2	2	5	5	5	5	2	3	4
368	2	6	24	5	教育学 Pedagogy	2	2	5	2	3	2	4	4	4	5	4	2	2	2	3	4	4	4	4	4	5	4	4	4	4	4	4	4	3	3	4	4	4	2	2
369	2	5	24	5	职业教育 vocational education	3	2	3	4	3	4	4	4	4	3	4	4	4	3	4	4	3	4	4	3	4	4	4	4	4	3	4	3	2	4	4	4	4	3	4
370	1	6	25	6	分析化学 Analytical Chemistry	4	2	3	3	3	3	3	3	3	3	3	3	3	3	3	3	3	3	3	3	3	3	3	3	3	3	3	3	3	3	3	3	3	3	3
371	1	6	24	5	计算机科学与技术 Computer Science and Technology	3	1	3	3	4	4	4	4	4	4	4	4	4	4	4	4	4	4	4	4	4	4	4	4	4	4	4	4	4	4	4	4	4	4	4
372	2	1	18	4	小学教育 Primary education	2	1	5	2	3	4	2	2	2	4	2	2	2	2	2	2	2	2	3	3	3	3	3	3	3	3	3	3	3	3	3	3	3	3	3
373	2	6	26	5	学前教育学 Preschool Education	4	2	5	2	4	3	3	4	1	4	3	2	3	1	4	4	5	4	2	3	4	3	4	4	5	5	3	3	2	4	3	4	2	4	3
374	1	1	19	4	小学教育 Primary education	1	1	2	2	2	2	2	2	5	5	2	5	5	5	5	5	5	5	5	5	5	5	5	5	3	3	3	3	2	5	5	5	5	2	5
375	2	6	23	5	学前教育 Preschool Education	3	2	4	2	2	3	4	4	4	4	2	2	4	2	4	4	4	3	4	4	3	4	4	4	3	4	2	3	2	4	4	4	4	4	2
376	1	5	24	5	环境工程 Environmental Engineering	2	1	5	5	3	3	4	3	3	4	4	3	4	3	4	3	5	4	5	4	5	4	5	4	4	5	4	4	4	3	4	5	4	5	5
377	2	4	22	4	小学教育 Primary education	1	1	5	2	3	4	4	5	3	4	3	3	2	3	4	2	4	5	3	3	3	3	4	5	4	4	4	4	4	4	2	3	3	4	4
378	1	2	19	5	交通运输 Transportation	2	1	4	1	1	1	1	5	2	4	4	5	1	3	1	2	5	3	5	2	4	2	1	1	4	4	4	4	3	4	1	1	1	5	5
379	2	2	19	4	通信工程 Communication Engineering	4	1	5	3	4	4	3	4	3	4	2	3	4	2	2	3	4	4	3	3	4	3	3	4	4	4	4	4	2	4	2	2	2	3	3
380	2	1	18	4	小学教育 Primary education	3	2	1	4	2	1	4	5	1	1	3	4	1	1	1	1	3	3	2	2	3	1	1	1	5	5	5	5	5	5	5	5	5	5	5
381	2	3	21	5	工业设计 Industrial Design	2	1	5	4	4	3	4	4	4	4	3	2	2	3	2	3	4	3	4	4	4	4	4	4	4	4	3	4	4	4	4	4	3	3	4
382	2	4	22	4	生物技术 Biotechnology	2	1	2	1	3	2	3	4	2	2	3	3	3	3	3	3	4	2	2	4	2	3	3	4	3	3	3	3	3	3	3	3	3	3	3
383	2	7	27	5	教育学 Pedagogy	1	2	4	3	4	4	4	4	4	4	4	4	4	4	1	2	4	4	2	2	2	2	2	2	4	4	4	2	4	2	2	2	3	3	3
384	2	1	18	4	小学教育 Primary education	2	2	5	3	3	4	4	4	3	4	4	4	3	3	4	3	3	4	4	4	4	3	3	3	4	4	4	4	4	4	4	4	4	4	4
385	1	2	19	5	交通运输 Transportation	2	1	3	3	4	3	4	4	4	2	4	4	2	2	4	4	2	4	2	4	4	4	4	4	4	4	3	4	4	4	4	4	4	4	4
386	2	2	18	3	学前教育 Preschool Education	1	1	5	2	1	1	1	5	4	5	4	5	4	1	1	2	4	3	2	2	4	2	2	3	2	4	2	3	4	4	3	2	3	4	3
387	2	4	22	4	历史学 History	1	2	3	1	2	1	3	3	2	2	4	3	2	1	2	2	4	3	2	3	4	3	4	4	4	4	2	2	4	3	2	4	3	3	4
388	2	3	20	6	历史学 History	2	1	4	4	4	4	4	4	4	4	4	4	4	4	4	4	4	4	4	4	4	4	4	4	4	4	4	4	3	4	4	4	3	4	4
389	1	2	19	5	交通运输 Transportation	2	1	4	2	4	3	2	4	2	3	4	4	4	3	4	3	4	4	3	2	4	2	4	2	4	4	4	4	4	4	4	4	4	4	4
390	1	4	21	6	环境科学 Environmental Science	3	1	5	5	5	5	5	3	5	5	5	3	3	5	5	5	5	5	4	5	4	5	5	5	5	5	5	2	1	5	2	5	5	2	2
391	2	5	23	6	化学工程 Chemical Engineering	1	1	4	2	2	3	4	4	5	4	3	1	4	2	3	4	4	4	4	3	4	3	4	2	4	4	3	3	2	4	3	4	4	4	4
392	2	1	20	4	小学教育 Primary education	1	1	4	2	3	4	4	5	4	4	4	3	5	3	4	4	4	4	4	2	4	4	4	3	4	4	4	4	4	4	3	4	4	4	4
393	2	6	24	6	生物化学与分子生物学 Biochemistry and Molecular Biology	1	1	3	4	3	4	4	4	2	3	4	4	2	2	2	2	4	4	4	4	4	4	4	3	4	4	4	2	4	4	3	3	2	4	3
394	1	2	19	5	交通运输 Transportation	4	1	4	2	5	3	4	5	5	5	4	4	5	3	3	4	2	3	4	5	5	3	4	3	4	5	5	3	4	3	1	2	1	4	3
395	2	1	19	5	交通运输 Transportation	2	2	4	3	3	2	4	4	4	4	4	4	3	3	3	2	4	2	4	4	4	4	3	4	4	4	4	4	4	4	4	3	4	3	4
396	1	4	23	4	软件工程 Software Engineering	3	2	1	1	5	1	1	1	3	1	3	4	4	1	1	1	1	1	1	1	1	2	1	1	1	2	3	3	3	2	3	2	4	2	3
397	2	3	20	4	小学教育 Primary education	2	1	4	2	3	2	2	4	1	4	5	4	3	4	3	4	3	4	2	4	4	3	2	4	4	4	4	4	3	3	3	2	2	3	4
398	2	1	18	5	交通运输 Transportation	2	2	5	3	4	4	4	4	2	4	3	3	4	2	4	2	4	3	4	3	4	4	4	4	4	4	4	4	3	4	4	3	3	3	4
399	2	1	18	5	交通运输 Transportation	1	1	2	2	1	3	4	4	1	4	3	4	1	1	1	1	4	4	2	2	4	4	4	4	3	4	3	2	4	3	4	2	2	4	4
400	2	4	21	4	历史学 History	1	1	5	3	4	2	3	4	4	4	4	5	5	2	4	3	5	4	2	1	2	3	1	3	4	4	3	1	4	4	2	2	4	2	5
401	2	1	18	5	交通运输 Transportation	1	2	4	3	3	2	5	4	4	4	4	5	4	4	3	3	4	5	2	2	4	4	2	3	4	4	3	3	4	3	2	3	4	4	4
402	1	2	19	6	环境科学 Environmental Science	3	1	2	4	2	2	4	4	4	4	4	4	2	2	4	4	4	4	4	2	2	2	4	4	4	4	4	4	4	4	4	4	4	4	4
403	2	3	21	4	小学教育 Primary education	3	1	4	2	4	4	4	4	4	4	4	4	2	2	4	4	4	4	4	3	3	4	2	4	4	4	4	4	3	4	4	4	2	3	2
404	2	3	21	4	小学教育 Primary education	4	1	4	4	4	1	2	4	4	4	4	2	3	3	4	4	4	4	3	3	3	3	3	3	3	3	3	3	3	3	4	4	3	4	3
405	1	1	19	5	交通运输 Transportation	3	1	4	1	5	1	3	4	4	2	4	3	3	3	3	3	3	3	3	3	3	3	3	2	4	4	4	4	5	4	2	3	1	4	5
406	2	6	24	4	历史学 History	3	2	5	3	5	1	4	3	4	4	3	2	3	2	4	4	4	4	4	5	3	5	5	5	4	4	4	3	3	3	2	3	4	3	4
407	2	3	20	4	小学教育 Primary education	2	1	2	2	1	1	2	5	4	2	4	5	4	2	2	4	4	4	2	4	4	4	4	4	4	4	2	4	4	4	2	4	2	4	4
408	1	3	21	5	环境科学 Environmental Science	3	1	4	3	4	3	4	2	5	4	4	4	3	4	4	3	4	4	4	4	4	4	4	4	4	3	4	3	3	4	4	3	4	3	3
409	2	5	23	6	教育经济与管理 Educational Economics and Management	3	1	4	4	4	3	4	4	5	4	2	3	4	5	3	4	5	3	4	4	4	3	4	4	4	4	5	4	3	4	4	4	4	5	4
410	2	1	18	4	小学教育 Primary education	2	1	4	1	1	3	2	5	1	5	5	5	1	3	1	1	3	5	1	1	4	3	1	1	5	5	5	5	5	5	1	1	1	5	5
411	2	2	19	5	交通运输 Transportation	3	1	4	3	3	2	3	4	3	4	4	4	3	2	2	2	4	2	2	2	4	4	4	4	4	4	4	4	4	4	4	2	2	4	4
412	1	3	20	4	教育经济与管理 Educational Economics and Management	3	2	3	3	3	3	3	3	3	3	3	3	3	3	3	3	3	3	3	3	3	3	3	3	3	3	3	3	3	3	3	3	3	3	3
413	2	3	20	4	小学教育 Primary education	3	1	5	1	3	1	2	4	4	3	4	4	3	1	2	1	4	5	2	2	3	3	3	3	4	3	4	3	3	3	1	4	2	4	4
414	2	3	21	4	小学教育 Primary education	2	1	2	3	2	3	2	3	2	3	4	3	2	2	3	3	2	3	2	2	2	2	2	2	2	2	2	2	2	2	2	2	2	3	3
415	2	1	18	5	交通运输 Transportation	2	1	4	2	4	4	3	3	3	3	3	3	4	3	3	3	4	4	2	2	3	4	4	4	4	4	4	4	4	4	4	4	4	3	4
416	1	6	24	3	教育经济与管理 Educational Economics and Management	3	1	5	2	5	4	4	2	5	5	2	2	5	2	3	2	3	2	2	3	2	2	4	4	4	4	2	2	2	4	2	4	4	3	2
417	2	3	20	2	教育经济与管理 Educational Economics and Management	3	1	4	2	4	1	2	4	4	3	4	1	4	2	4	4	5	5	2	4	4	4	5	5	4	4	4	5	3	4	5	5	4	3	5
418	1	1	18	5	交通运输 Transportation	1	2	4	3	4	5	5	4	3	5	4	2	5	3	3	4	4	5	4	3	3	2	4	4	4	4	3	3	4	3	3	4	4	4	4
419	2	3	20	4	小学教育 Primary education	3	1	4	2	4	2	3	4	1	4	3	3	3	2	2	3	4	4	2	2	4	3	3	2	4	4	4	3	3	4	2	3	2	4	4
420	2	2	19	6	教育经济与管理 Educational Economics and Management	5	1	4	2	3	2	4	4	2	3	4	4	4	2	4	2	4	5	3	3	4	4	4	4	3	4	2	2	3	4	3	3	2	4	3
421	2	6	23	5	学前教育 Preschool Education	5	1	5	2	4	3	4	4	5	5	3	1	5	5	5	5	5	5	3	3	3	3	5	5	3	3	4	2	3	4	4	4	4	3	3
422	2	6	23	5	教师教育 Teacher Education	2	1	4	2	4	3	3	2	3	4	4	2	4	2	4	4	4	5	3	2	3	4	4	4	3	3	4	3	3	4	3	3	3	3	2
423	1	7	26	4	学前教育 Preschool Education	2	2	2	2	3	2	3	2	3	3	3	3	3	2	3	3	3	3	4	2	3	2	3	2	3	3	3	2	2	3	2	3	2	4	3
424	1	6	25	6	环境工程 Environmental Engineering	3	1	4	2	2	2	4	4	2	4	3	2	2	2	4	4	2	2	3	4	4	2	2	2	4	4	4	4	4	4	2	2	2	3	3
425	2	6	24	5	学前教育 Preschool Education	2	1	5	2	4	3	3	2	4	4	2	2	4	4	4	4	4	5	3	4	4	4	4	4	4	4	4	4	2	2	4	4	4	2	2
426	2	1	18	4	小学教育 Primary education	1	1	3	4	2	2	4	4	4	2	3	4	1	1	2	2	4	4	2	2	2	3	2	1	2	4	2	1	5	3	5	3	1	5	5
427	2	6	24	4	学前教育 Preschool Education	3	1	5	3	5	5	1	5	5	5	5	5	5	5	5	5	5	5	5	5	5	5	5	5	5	5	5	5	5	5	5	5	5	5	5
428	2	6	23	5	行政管理 Administration	1	2	5	2	3	2	4	4	4	5	3	2	4	4	5	5	5	4	3	3	4	4	5	5	4	2	4	3	2	5	4	5	5	1	1
429	2	4	21	5	行政管理 Administration	2	1	4	2	4	2	4	4	4	4	3	2	2	2	2	2	4	3	2	2	4	4	3	3	4	3	4	4	2	4	3	4	2	3	2
430	2	4	21	5	行政管理 Administration	1	1	4	2	2	4	4	4	4	4	4	2	2	2	2	2	4	2	2	2	2	2	3	2	4	3	4	4	3	4	4	4	5	4	3
431	1	3	20	4	小学教育 Primary education	2	1	4	4	4	4	4	4	4	4	4	4	4	4	4	4	4	4	4	4	4	4	4	4	3	3	4	4	4	4	4	4	4	4	4
432	2	3	19	4	小学教育 Primary education	2	1	4	4	3	4	4	4	2	3	2	3	3	2	4	4	4	4	2	3	3	4	4	4	4	4	4	4	2	4	4	4	4	2	2
433	2	6	23	4	行政管理 Administration	3	1	4	4	3	2	3	4	4	4	4	4	4	3	3	3	4	4	4	4	4	4	4	3	4	4	4	4	4	3	3	3	3	4	4
434	2	1	17	5	交通运输 Transportation	3	1	4	2	3	2	4	4	3	2	3	4	4	1	2	2	4	4	1	3	4	4	3	4	4	4	4	2	3	4	2	3	2	3	4
435	2	4	21	6	行政管理 Administration	1	1	5	3	2	4	4	5	4	1	4	2	2	1	4	4	4	4	2	2	5	5	5	4	4	4	4	4	4	5	3	4	4	3	4
436	2	4	22	4	小学教育 Primary education	1	1	4	2	4	4	4	4	5	4	2	1	3	2	2	4	4	4	4	4	4	4	3	3	4	3	4	4	4	4	4	4	4	4	4
437	2	3	20	4	小学教育 Primary education	1	1	2	4	2	1	2	4	2	2	4	4	2	2	3	3	2	4	3	1	4	2	2	2	4	4	4	4	3	3	1	2	3	5	4
438	2	4	21	5	行政管理 Administration	4	1	5	2	3	4	4	5	2	4	3	1	5	4	5	5	5	5	3	3	4	4	4	4	4	4	4	3	3	4	4	2	2	3	4
439	2	1	17	4	小学教育 Primary education	3	1	3	3	2	3	5	4	4	4	4	4	4	3	3	3	4	3	2	3	4	2	2	2	4	2	3	3	4	4	3	2	3	4	4
440	1	4	20	6	行政管理 Administration	3	2	4	3	4	4	4	5	4	4	3	2	3	3	4	3	4	4	5	3	4	4	4	4	4	4	3	4	3	5	4	4	2	4	3
441	2	3	20	4	小学教育 Primary education	2	2	5	4	3	4	4	5	5	5	5	5	5	5	5	5	5	5	5	5	5	5	5	5	5	5	5	5	5	5	5	5	5	5	5
442	2	3	20	4	小学教育 Primary education	2	1	2	2	4	1	1	5	1	2	4	4	4	1	3	2	4	2	2	2	2	3	1	1	4	4	3	2	3	3	3	5	3	3	5
443	2	3	20	6	环境科学 Environmental Science	3	1	4	1	2	3	4	4	2	4	3	4	2	2	3	3	4	3	1	3	2	4	3	4	4	4	2	2	3	4	2	4	4	4	4
444	2	4	21	4	行政管理 Administration	1	1	4	2	2	2	2	4	2	3	4	3	3	3	2	2	4	4	3	2	4	3	2	2	4	4	4	4	4	3	3	3	2	4	4
445	1	1	17	5	行政管理 Administration	2	3	4	3	2	1	3	4	2	2	3	3	2	4	3	3	4	4	2	3	4	4	4	4	3	4	3	4	4	4	3	3	2	4	4
446	2	3	19	4	小学教育 Primary education	3	2	3	4	3	2	4	4	3	3	4	4	4	4	4	3	4	4	3	3	2	3	2	3	4	4	4	4	3	3	4	3	3	4	4
447	2	5	24	4	教育学 Pedagogy	3	2	2	4	3	4	3	3	4	4	3	2	4	2	4	3	5	5	4	3	2	2	4	3	4	3	4	4	3	2	4	3	4	4	4
448	2	4	21	6	行政管理 Administration	2	1	2	2	2	2	2	4	3	2	2	4	2	2	2	2	4	3	2	2	3	2	3	2	4	3	2	2	3	4	2	3	2	4	4
449	2	1	18	4	小学教育 Primary education	3	2	4	2	2	1	4	4	1	3	5	4	4	2	2	2	4	3	2	3	3	3	3	2	4	4	4	4	4	4	3	2	3	4	3
450	2	3	20	4	小学教育 Primary education	3	1	3	2	2	2	3	4	3	3	4	2	3	3	2	4	4	4	3	2	2	3	4	4	4	3	4	2	3	3	2	3	2	4	4
451	2	4	22	6	行政管理 Administration	3	2	5	2	3	4	4	4	4	4	4	2	4	4	4	4	4	3	4	4	4	4	2	3	4	4	4	4	2	2	4	4	4	4	4
452	2	2	21	4	小学教育 Primary education	3	2	5	4	4	2	4	4	4	3	3	4	3	2	3	3	4	4	3	4	4	4	4	4	4	4	4	4	3	4	4	4	4	4	4
453	1	7	26	4	行政管理 Administration	1	2	4	4	4	4	4	4	4	4	4	4	4	4	4	4	4	4	4	4	4	4	4	4	4	4	4	4	4	4	4	4	4	4	4
454	2	1	18	5	学前教育 Preschool Education	2	1	4	2	1	3	3	4	2	3	4	4	2	2	3	3	4	4	4	4	4	3	4	4	4	3	3	2	4	3	3	3	2	4	4
455	1	6	24	4	计算机科学与技术 Computer Science and Technology	3	2	4	3	4	2	4	3	4	4	4	3	4	2	4	3	4	4	2	4	4	3	4	5	4	4	4	3	3	3	3	3	2	5	4
456	2	2	20	5	交通运输 Transportation	2	1	5	2	5	3	3	4	1	3	4	4	3	2	2	2	4	5	3	2	4	3	2	2	4	4	3	2	1	5	4	4	5	5	5
457	1	2	20	6	环境科学 Environmental Science	5	1	4	4	2	3	3	4	4	4	1	2	3	2	3	2	4	2	2	3	4	4	4	4	2	1	3	4	2	3	2	4	4	3	3
458	2	2	19	4	交通运输 Transportation	2	2	4	2	4	4	4	4	4	4	4	2	2	2	2	2	4	4	2	2	4	4	2	2	4	3	4	3	2	4	4	4	2	4	4
459	2	2	20	5	交通运输 Transportation	3	1	4	4	4	4	3	3	4	4	4	4	4	4	4	4	4	4	4	4	4	3	4	3	4	4	4	3	4	3	3	3	5	3	4
460	1	2	19	4	交通运输 Transportation	4	1	4	3	1	4	4	5	1	3	4	5	2	2	2	2	4	1	4	4	5	4	2	1	5	5	3	3	4	4	2	3	1	5	5
461	2	2	19	5	交通运输 Transportation	2	1	2	2	4	4	4	5	1	4	5	2	2	2	2	2	4	4	3	4	4	4	4	4	4	4	4	4	4	4	2	2	2	4	2
462	1	1	18	5	体育教育 Physical Education	4	2	3	1	1	3	3	3	3	3	5	5	4	5	3	3	3	3	4	3	2	2	2	2	3	3	3	3	3	3	3	3	3	3	3
463	2	2	19	5	交通运输 Transportation	2	2	4	2	2	3	4	5	4	3	4	5	1	2	1	2	3	2	2	4	4	4	4	4	4	3	3	3	3	4	4	3	2	4	4
464	1	1	18	4	体育教育 Physical Education	2	1	5	5	5	5	5	5	5	5	5	5	5	5	5	5	5	5	5	5	5	5	5	5	5	5	5	5	5	4	4	4	4	4	4
465	2	1	19	4	体育教育 Physical Education	3	2	5	2	3	3	3	3	2	4	4	1	2	2	2	2	3	4	2	2	2	3	2	3	4	4	4	3	4	4	3	3	3	2	4
466	2	1	18	4	体育教育 Physical Education	3	1	1	3	4	2	1	1	2	4	4	4	2	4	2	4	4	1	3	4	4	2	2	3	1	3	4	4	4	3	3	1	1	1	1
467	1	1	18	4	体育教育 Physical Education	2	2	3	3	5	3	4	5	5	4	5	2	3	2	4	3	5	2	4	4	3	4	4	4	5	5	5	3	5	3	3	2	2	4	4
468	1	2	20	5	交通运输 Transportation	4	1	3	3	3	3	3	3	3	3	3	4	3	3	4	4	4	4	4	4	4	4	4	3	4	4	4	4	4	4	4	4	4	3	4
469	2	2	19	5	交通运输 Transportation	1	1	1	1	4	4	2	4	4	4	2	1	4	2	4	2	4	1	1	2	2	2	3	3	2	3	2	2	3	3	3	3	4	2	2
470	2	2	20	5	交通运输 Transportation	3	1	2	3	2	3	4	2	2	4	3	3	3	3	4	4	4	3	2	3	4	4	4	4	3	3	2	2	2	4	2	4	3	3	3
471	2	2	20	5	思想政治教育 Ideological and Political Education	3	1	4	2	2	1	2	4	1	2	4	4	2	2	3	3	2	4	2	2	4	2	4	2	4	4	3	4	3	4	3	3	3	3	4
472	2	2	19	5	交通运输 Transportation	3	1	5	4	3	3	3	4	4	4	4	3	3	4	4	4	4	4	4	4	4	4	4	4	4	3	3	3	3	3	3	3	3	3	3
473	2	2	18	5	交通运输 Transportation	2	1	5	4	3	4	4	4	5	5	2	2	4	4	4	4	4	5	4	4	4	4	4	2	4	2	4	4	2	5	4	3	4	2	2
474	1	1	18	5	体育教育 Physical Education	3	1	4	4	4	4	4	4	4	4	3	3	3	3	3	3	3	3	3	3	3	3	3	3	3	3	3	3	3	3	3	3	3	3	3
475	2	1	18	5	交通运输 Transportation	1	1	5	1	1	3	3	5	2	5	3	5	2	2	3	2	2	2	3	4	3	3	4	3	3	4	3	3	3	3	4	3	2	3	3
476	2	2	20	5	交通运输（全英文） Transportation（English）	3	1	5	2	2	2	2	4	2	4	2	4	2	2	2	2	2	2	2	2	2	2	2	2	4	4	2	2	2	2	2	2	2	2	4
477	1	1	18	4	体育教育 Physical Education	3	2	5	4	2	4	4	3	4	4	4	5	5	3	3	3	2	4	3	2	4	3	3	3	4	4	4	3	4	3	3	2	3	4	4
478	2	6	23	5	职业技术教育 Vocational and Technical Education	3	2	1	2	3	4	3	2	1	2	3	4	5	4	3	2	1	1	2	3	4	1	2	3	1	2	3	4	5	4	3	2	1	2	3
479	2	1	19	4	教师教育 Teacher Education	5	1	4	3	3	3	4	4	4	4	3	3	4	2	3	2	4	4	2	3	4	4	3	4	3	4	3	3	4	3	3	2	3	3	2
480	2	3	20	4	小学教育 Primary education	1	2	5	3	3	4	4	4	4	5	3	5	2	2	3	2	4	4	3	4	4	4	2	2	3	4	2	2	3	4	4	4	5	2	3
481	1	2	21	4	环境科学 Environmental Science	1	1	4	3	4	4	4	4	4	4	4	4	4	4	4	3	3	3	4	4	3	3	4	3	4	3	3	3	4	4	3	4	4	4	4
482	1	1	18	4	教师教育 Teacher Education	4	1	5	2	2	1	2	5	2	4	4	2	5	1	2	2	5	4	1	3	4	3	4	2	4	4	3	4	2	4	1	5	3	4	4
483	2	4	21	5	行政管理 Administration	3	2	5	3	2	3	4	5	3	5	4	2	4	3	5	4	5	5	3	3	2	3	3	4	4	4	4	2	1	2	4	5	2	3	5
484	2	2	19	4	环境科学 Environmental Science	2	1	5	4	4	4	3	5	4	4	4	3	2	3	2	3	5	4	3	3	2	3	2	2	5	4	4	5	4	3	4	3	2	4	3
485	1	4	22	5	行政管理 Administration	3	1	4	2	4	4	4	2	1	4	4	3	2	2	4	4	4	4	1	2	4	4	4	4	4	4	4	2	4	2	2	2	4	4	4
486	1	2	20	4	环境科学 Environmental Science	3	1	3	1	2	2	3	4	2	2	2	2	4	2	3	2	2	3	2	3	3	3	2	2	3	4	2	2	3	3	2	4	4	4	3
487	2	4	21	6	行政管理 Administration	3	1	4	1	4	2	4	5	1	4	4	3	2	1	1	1	2	2	1	1	4	2	1	1	4	4	2	2	4	2	2	3	2	4	4
488	2	2	20	4	环境科学 Environmental Science	1	2	3	3	3	3	3	3	3	3	3	3	3	3	3	3	3	3	3	3	3	3	3	3	3	3	3	3	3	3	3	3	3	3	3
489	2	4	20	4	行政管理 Administration	1	1	2	4	5	4	4	4	4	4	5	2	2	4	1	3	5	5	4	2	4	4	5	2	5	5	5	2	4	4	4	5	2	4	4
490	1	2	23	4	环境科学 Environmental Science	3	1	2	1	4	4	4	4	3	4	3	2	2	2	3	3	4	4	3	4	4	4	3	3	4	3	4	4	3	4	4	3	3	3	2
491	2	3	21	2	计算机信息管理 Computer Nnformation Management	2	2	5	4	4	4	3	3	4	4	4	4	4	4	4	4	4	4	3	3	4	4	2	3	4	4	4	4	4	4	4	4	4	4	4
492	2	6	25	5	职业技术教育 Vocational and Technical Education	4	1	4	4	4	3	4	5	4	4	4	2	3	3	4	4	5	4	3	4	4	4	5	5	4	2	4	2	2	4	3	5	4	3	3
493	2	3	20	4	小学教育 Primary education	3	1	4	2	3	4	4	5	4	4	3	2	2	2	3	2	5	4	4	2	3	2	4	4	4	4	4	2	3	4	4	4	3	2	2
494	2	4	20	6	公共事业管理 Public Utility Management	2	1	4	3	3	2	5	4	3	5	4	2	2	3	4	5	5	5	5	5	5	5	3	3	4	5	5	5	3	4	4	4	2	3	2
495	2	4	22	6	行政管理 Administration	5	2	2	2	2	4	4	4	4	3	2	3	2	3	4	4	4	4	4	4	3	3	4	4	4	4	4	4	2	4	2	3	4	3	3
496	2	3	20	4	小学教育 Primary education	1	1	2	2	4	2	4	4	2	2	4	2	2	2	2	2	4	4	2	4	4	4	4	4	4	2	4	2	2	4	4	4	2	4	4
497	2	1	18	4	体育教育 Physical Education	3	2	5	4	3	5	5	5	1	5	5	4	5	5	3	4	5	5	3	3	3	3	1	3	5	5	5	3	5	3	3	3	1	5	5
498	2	2	18	4	学前教育 Preschool Education	4	1	4	1	1	1	1	4	1	2	1	1	2	1	1	2	4	1	1	1	4	1	1	1	1	1	1	1	1	1	1	1	1	3	4
499	1	2	18	5	交通运输 Transportation	4	2	3	3	3	3	3	3	3	3	3	3	3	3	3	3	3	3	3	3	3	3	3	3	3	3	3	3	3	3	3	3	3	3	3
500	1	2	19	4	环境科学 Environmental Science	2	2	4	3	3	4	3	4	2	3	3	4	2	2	2	2	4	3	2	2	4	3	2	2	4	4	3	2	3	3	3	2	2	4	4
501	2	2	19	4	环境科学 Environmental Science	3	1	5	2	4	5	3	5	1	5	5	5	5	5	3	4	4	5	3	2	4	4	4	4	4	4	4	3	2	4	2	4	2	4	4
502	2	3	20	5	交通运输（全英文） Transportation（English）	1	1	4	4	3	2	4	4	2	2	3	2	2	3	2	2	4	4	3	3	4	3	4	4	4	4	4	3	3	3	3	4	3	4	4
503	1	7	27	5	职业技术教育 Vocational and Technical Education	3	1	2	5	5	1	4	5	5	3	5	2	3	1	4	1	2	4	2	4	5	4	2	3	5	5	3	2	5	5	4	4	3	4	3
504	2	4	21	6	行政管理 Administration	3	2	4	2	4	1	3	5	2	3	4	5	1	2	2	3	4	5	4	3	4	2	3	4	4	4	3	2	4	3	2	2	2	5	4
505	1	2	20	4	环境科学 Environmental Science	4	1	5	3	3	3	3	5	5	4	5	3	4	4	4	4	3	4	3	3	4	3	4	4	5	4	5	4	3	4	4	3	3	5	4
506	2	2	18	5	交通运输 Transportation	3	2	5	3	1	3	2	5	1	5	4	4	2	1	2	1	2	2	1	2	4	4	3	3	4	4	4	2	3	3	3	3	2	5	4
507	2	6	22	6	环境科学与工程 Environmental Science and Engineering	2	1	3	2	4	3	2	3	1	2	2	1	2	1	2	1	4	2	2	2	4	4	4	4	4	3	2	4	2	3	4	4	2	4	4
508	1	1	18	5	交通运输 Transportation	3	1	5	5	1	1	1	4	5	5	3	5	5	1	2	1	1	1	1	1	1	1	1	1	3	3	3	3	3	3	3	3	3	5	5
509	1	3	20	4	体育教育 Physical Education	1	1	4	4	4	4	4	4	4	4	4	4	4	4	4	4	4	4	4	4	4	4	4	4	4	4	4	4	4	4	4	4	4	4	4
510	1	2	22	4	体育教育 Physical Education	1	1	5	4	4	4	4	4	4	4	4	4	4	4	4	4	4	4	4	4	4	4	4	4	4	4	4	4	4	4	4	4	4	4	4
511	2	2	19	4	环境科学 Environmental Science	1	1	5	1	2	5	5	5	5	5	5	5	1	5	3	4	5	5	5	5	5	5	5	5	5	5	5	5	1	5	5	5	3	3	5
512	1	3	20	4	体育教育 Physical Education	2	2	1	3	3	2	2	3	2	3	1	4	4	2	2	4	2	1	1	2	2	3	1	1	1	2	2	1	2	3	1	1	1	2	2
513	2	2	20	4	环境科学 Environmental Science	5	1	2	2	2	3	4	4	2	4	4	4	3	3	4	4	5	5	3	4	3	4	4	4	4	5	3	4	5	4	4	3	4	2	4
514	1	3	21	5	工业设计 Industrial Design	1	2	1	1	3	1	1	1	1	1	1	1	1	1	1	1	1	1	1	1	1	1	1	1	5	5	5	3	2	3	1	4	1	5	5
515	1	2	20	4	环境科学 Environmental Science	5	1	3	2	3	3	3	1	4	4	3	2	3	1	2	2	3	1	3	3	3	4	4	2	4	4	3	3	4	4	3	4	3	3	2
516	1	3	21	4	体育教育 Physical Education	5	1	4	2	2	2	2	4	2	4	4	4	4	2	2	3	3	4	2	2	3	3	3	3	4	4	3	2	4	3	3	3	3	4	4
517	2	2	19	4	交通运输 Transportation	3	2	4	3	4	3	4	3	5	3	4	3	2	2	5	3	4	4	2	2	4	4	4	4	4	3	4	3	4	4	3	4	4	5	4
518	2	2	19	4	交通运输 Transportation	4	1	3	3	3	3	3	3	5	3	2	3	2	3	5	3	3	3	3	3	3	3	3	3	3	3	3	3	3	3	3	3	3	3	3
519	1	2	20	4	环境科学 Environmental Science	4	1	3	3	3	3	3	3	3	3	3	3	3	3	3	3	3	3	3	3	3	3	3	3	4	4	4	4	4	4	4	4	4	4	4
520	2	2	18	4	环境科学 Environmental Science	2	1	4	2	3	2	3	4	2	4	4	3	3	2	2	2	4	2	2	2	3	3	2	3	4	2	2	3	2	3	2	3	3	4	3
521	2	4	21	5	生物技术 Biotechnology	1	1	2	2	1	2	2	2	2	2	2	2	2	2	2	4	4	4	4	4	4	4	4	3	3	3	3	3	3	3	3	3	3	3	3
522	1	1	18	5	交通运输 Transportation	1	1	2	2	2	1	3	2	2	1	3	3	2	1	3	1	2	3	2	4	4	3	4	3	3	1	2	3	2	3	3	2	3	3	2
523	1	3	21	4	公共事业管理 Public Utility Management	2	1	4	3	2	2	5	4	2	3	2	3	4	2	2	2	4	2	2	4	4	4	4	4	3	2	2	3	4	4	3	4	4	4	4
524	1	5	24	6	机械 Mechanical	1	1	2	4	2	4	2	4	4	4	4	3	3	4	4	3	3	2	3	3	4	4	3	4	4	3	4	4	3	3	3	3	4	4	4
525	1	2	19	5	交通运输 Transportation	4	2	3	2	2	2	3	3	2	3	4	3	4	3	2	3	4	4	3	3	3	3	3	3	4	4	3	4	4	3	4	3	4	3	4
526	2	1	17	5	交通运输 Transportation	2	1	5	2	2	4	2	5	4	4	4	5	2	2	4	2	4	5	4	2	2	2	4	4	4	4	4	4	4	4	2	4	2	4	5
527	2	4	21	5	生物技术 Biotechnology	3	1	2	4	1	3	4	4	5	2	4	1	5	1	2	2	4	2	2	4	4	2	2	2	4	4	4	4	4	4	1	4	4	4	4
528	2	7	25	5	法学 Law	3	1	4	3	2	4	4	4	4	4	4	4	4	4	4	4	4	4	4	4	4	4	4	4	4	4	4	4	4	4	4	4	4	4	4
529	1	5	23	6	机械 Mechanical	2	1	5	1	5	3	4	4	3	3	4	3	4	3	4	2	3	4	4	2	4	4	2	4	4	3	2	3	3	4	5	4	4	4	3
530	1	5	23	6	生物学 Biology	3	1	2	2	4	2	4	4	2	3	2	4	2	2	1	1	1	4	4	2	2	3	2	2	3	3	3	3	3	3	4	4	2	3	3
531	1	3	22	4	体育教育 Physical Education	2	2	3	3	3	3	3	3	3	3	3	3	3	3	3	3	3	3	3	3	3	3	3	3	3	3	3	3	3	3	3	3	3	3	3
532	2	3	20	4	小学教育 Primary education	2	1	4	3	4	4	3	4	4	4	4	3	4	4	3	4	4	4	3	2	2	2	3	2	4	3	3	4	4	2	4	4	2	4	3
533	2	3	20	4	小学教育 Primary education	2	2	5	5	4	5	5	4	4	4	4	4	2	2	4	4	4	4	4	4	4	4	5	4	5	5	5	5	5	5	5	5	5	5	5
534	2	6	23	5	汉语言文学 Chinese Language and Literature	2	1	5	5	5	5	5	3	5	5	3	3	5	4	3	5	5	3	3	5	5	4	3	5	3	3	3	3	4	4	3	4	4	4	4
535	2	3	20	4	小学教育 Primary education	2	1	2	2	2	4	4	4	4	2	4	4	2	3	2	2	4	4	4	2	4	4	2	4	4	4	4	4	3	4	2	4	4	4	4
536	1	4	21	4	生物技术 Biotechnology	2	1	3	4	3	3	3	3	3	3	3	3	3	3	3	3	3	3	3	3	3	3	3	3	4	4	4	4	4	4	4	4	4	4	4
537	2	3	20	4	小学教育 Primary education	2	1	4	4	4	4	3	4	3	4	4	4	4	4	4	4	4	4	4	4	4	4	3	4	4	4	4	4	4	4	4	4	4	4	4
538	2	7	25	5	职业技术教育 Vocational and Technical Education	3	1	4	4	3	3	4	4	2	3	4	3	2	2	2	3	4	4	3	3	4	3	4	3	4	4	3	3	2	3	2	3	3	3	3
539	1	2	19	6	环境科学 Environmental Science	5	1	5	2	5	4	2	5	5	5	5	4	2	2	2	4	5	5	5	2	3	4	4	2	5	5	5	2	2	4	2	3	2	4	4
540	2	5	23	4	教育学 Pedagogy	2	2	4	2	4	2	3	3	4	4	3	4	4	3	4	3	4	4	3	4	4	4	4	4	4	4	4	4	4	4	4	4	4	4	4
541	2	6	26	4	职业技术教育 Vocational and Technical Education	1	1	3	2	2	3	2	5	5	3	4	4	2	2	4	4	5	4	4	4	2	2	2	2	4	4	4	2	2	2	2	2	2	4	4
542	2	4	21	4	统计学	4	3	4	1	1	3	4	5	5	4	4	4	4	4	4	4	4	4	4	4	4	4	4	4	5	4	4	4	4	4	4	4	4	4	4
543	2	5	25	5	职业技术教育 Vocational and Technical Education	3	1	5	3	4	2	4	5	4	4	4	3	2	1	2	2	3	4	1	4	3	3	2	2	4	4	3	4	3	3	2	2	1	4	4
544	1	4	21	5	生物技术 Biotechnology	2	1	2	1	2	3	3	4	2	2	3	2	3	1	3	3	3	3	3	3	3	3	3	3	3	3	3	3	3	3	3	3	3	3	3
545	1	1	19	4	体育教育 Physical Education	5	2	5	3	5	5	3	5	2	4	3	4	4	3	3	3	4	3	4	3	3	3	3	4	4	4	4	3	5	4	4	3	4	4	4
546	2	5	22	5	职业技术教育 Vocational and Technical Education	3	1	4	2	4	3	4	4	4	4	4	3	2	4	4	4	4	4	4	3	3	4	4	4	4	4	4	4	3	4	2	4	4	3	2
547	1	3	21	4	体育教育 Physical Education	3	2	5	2	4	4	3	5	5	5	4	4	3	5	4	5	4	5	5	1	5	3	5	5	5	5	5	5	5	5	3	3	3	4	2
548	1	1	19	4	化学 Chemistry	2	1	5	1	3	1	4	4	5	4	4	4	2	4	2	2	4	3	1	2	4	3	4	2	5	4	2	2	3	2	2	2	3	4	3
549	1	6	24	5	船舶与海洋工程 Naval Architecture and Ocean Engineering	3	1	5	1	5	1	4	5	5	5	5	5	5	4	5	5	5	5	5	5	5	5	5	5	5	5	5	3	4	4	3	4	3	4	5
550	2	6	24	6	环境科学 Environmental Science	2	2	4	3	4	2	4	3	3	4	3	4	4	3	4	4	4	4	3	4	4	4	4	4	3	3	4	4	3	4	4	4	4	3	3
551	1	3	21	4	体育教育 Physical Education	4	1	4	4	4	4	4	4	4	4	4	4	4	4	4	4	4	4	4	4	4	4	4	4	4	4	4	4	4	4	4	4	4	4	4
552	2	3	20	5	学前教育 Preschool Education	2	2	4	1	2	4	3	4	2	4	2	5	2	2	4	2	2	4	4	4	4	4	4	4	4	2	2	2	3	4	1	1	1	4	4
553	2	3	19	4	小学教育 Primary education	3	1	2	2	4	3	4	4	5	4	3	2	4	1	4	4	5	4	2	3	3	4	4	4	4	4	1	1	2	4	2	4	3	4	4
554	2	4	，21	5	机械设计制造 Mechanical Design and Manufacture	4	2	5	3	4	2	3	4	5	5	2	1	5	3	4	4	4	4	4	4	4	4	5	5	5	5	5	5	2	5	5	5	5	5	3
555	1	6	24	5	生物学 Biology	2	1	4	3	4	4	5	5	4	4	4	2	5	3	4	4	4	5	3	2	4	4	4	3	4	2	3	4	3	4	5	4	4	3	3
556	1	7	26	5	化学 Chemistry	2	1	4	1	2	1	1	4	4	4	3	1	1	2	3	2	1	4	1	4	4	1	4	4	4	3	4	4	4	4	3	3	1	3	3
557	2	4	21	5	生物工程 Biological Engineering	1	2	1	1	1	1	4	4	2	1	3	3	3	3	4	3	4	4	2	2	2	4	4	4	3	4	3	3	2	4	2	2	4	4	3
558	2	5	25	4	学前教育 Preschool Education	4	1	5	5	4	2	3	2	2	4	2	1	4	4	3	2	3	4	2	3	4	2	5	5	2	2	1	2	3	4	4	4	3	4	2
559	1	6	27	6	船舶与海洋工程 Naval Architecture and Ocean Engineering	5	1	1	1	4	4	2	4	4	2	4	4	4	2	2	4	4	2	2	4	2	2	4	3	4	2	4	4	3	3	4	3	4	3	4
560	2	4	23	6	行政管理 Administration Administration	4	1	3	4	4	2	5	4	4	4	3	1	4	3	4	5	5	3	4	4	4	4	5	5	4	3	3	3	4	4	4	4	3	4	2
561	2	3	21	4	体育教育 Physical Education	2	2	4	4	3	3	4	4	4	4	4	4	4	4	4	4	4	4	4	4	4	4	3	4	4	4	4	4	4	4	4	4	4	4	4
562	2	4	21	6	行政管理 Administration	1	2	4	2	3	2	3	4	4	3	3	3	3	3	3	3	3	3	3	3	3	3	3	3	3	3	3	3	3	3	3	3	3	3	3
563	2	4	21	6	行政管理 Administration	2	2	4	3	1	2	3	4	1	2	4	4	1	1	1	2	4	4	2	2	2	3	1	2	5	4	3	3	4	2	2	2	3	4	5
564	1	4	21	4	物理学 Physics	1	1	4	2	2	1	2	1	4	4	2	1	2	4	2	2	2	4	1	2	2	4	2	2	4	2	4	4	4	4	2	4	2	4	4
565	2	4	21	4	环境科学 Environmental Science	1	3	4	1	4	1	5	2	5	2	2	1	5	1	5	2	5	4	4	5	5	5	5	5	2	2	1	1	4	5	5	5	5	4	1
566	2	2	21	5	法学 Law	1	1	4	3	2	3	4	5	2	3	4	2	3	3	3	4	5	4	2	3	4	4	2	3	4	4	3	4	3	4	2	3	3	4	4
567	2	4	21	6	行政管理 Administration	2	2	2	5	5	2	3	5	2	5	2	5	2	1	2	2	5	5	2	4	4	3	4	4	4	4	2	4	5	5	1	4	2	4	4
568	2	4	21	6	行政管理 Administration	2	1	4	3	4	3	3	4	4	4	4	4	2	2	2	2	4	3	1	2	4	4	4	4	4	4	2	4	3	4	2	3	2	3	2
569	2	4	20	6	行政管理 Administration	3	1	1	1	1	1	1	1	1	1	2	2	2	2	2	2	2	2	2	4	4	4	4	4	3	3	3	3	2	2	2	4	2	3	3
570	2	5	24	4	汉语言文学 Chinese Language and Literature	3	2	5	5	5	5	5	5	4	5	3	4	4	5	4	4	5	5	4	4	4	4	4	4	3	4	4	4	2	4	3	4	3	4	2
571	2	2	19	4	交通运输 Transportation	2	1	4	3	4	3	2	4	5	4	3	3	3	3	3	3	3	3	3	3	3	3	3	2	5	4	4	4	3	3	3	3	3	3	3
572	1	6	24	5	光学工程 Optical Engineering	3	1	4	1	4	1	3	4	2	4	2	3	2	2	4	4	4	4	3	4	4	4	4	4	4	3	3	4	3	4	3	3	4	3	3
573	1	6	24	6	光学工程 Optical Engineering	1	1	2	2	2	3	3	3	2	2	3	3	3	2	3	3	3	3	3	3	2	3	2	2	4	4	4	4	4	4	3	3	3	4	3
574	2	4	21	4	物理学 Physics	2	2	3	2	4	2	4	5	3	3	3	3	2	2	3	4	5	4	4	5	5	5	2	4	4	4	3	4	4	4	4	4	3	2	3
575	2	4	21	6	行政管理 Administration	3	1	4	2	2	1	3	4	2	3	4	4	2	2	2	2	3	2	2	3	4	4	3	2	4	4	3	2	3	3	2	2	3	3	3
576	1	1	18	5	交通运输 Transportation	3	1	4	2	2	2	4	4	5	2	3	3	2	1	4	1	1	1	1	2	4	2	4	1	3	4	2	2	4	2	4	3	2	4	4
577	2	6	23	6	教师教育 Teacher Education	3	1	2	1	4	2	2	2	4	2	4	2	2	1	4	2	4	2	1	2	2	4	2	2	4	4	2	2	2	4	2	4	4	3	4
578	2	4	21	5	电子商务 E-commerce	3	1	2	3	4	2	2	4	3	4	4	3	2	2	2	5	5	5	3	3	4	4	4	4	4	4	3	3	2	4	3	4	2	3	3
579	1	6	25	5	电子商务 E-commerce	3	2	2	2	3	1	1	1	2	2	2	2	2	2	2	2	2	2	3	2	2	2	3	2	1	1	2	2	2	2	2	3	3	3	3
580	1	4	21	6	行政管理 Administration	4	1	4	2	2	2	3	4	4	4	4	2	4	2	2	3	4	4	2	2	3	4	4	4	4	3	2	3	3	3	1	4	2	4	4
581	1	4	21	5	电子商务 E-commerce	3	1	2	1	4	2	4	4	4	3	4	4	4	2	2	3	2	2	2	2	4	4	1	2	5	5	2	1	4	4	2	2	2	4	4
582	2	4	22	6	环境科学 Environmental Science	2	1	4	3	3	2	3	4	4	4	3	4	3	2	2	3	4	4	3	4	4	4	4	4	3	3	2	3	3	4	3	4	3	3	3
583	2	5	23	5	教育技术学 Educational Technology	1	2	2	1	2	1	2	4	2	2	4	4	2	2	2	2	4	3	2	2	2	2	2	2	4	4	2	2	4	4	2	4	2	4	4
584	2	6	22	5	机电工程 Mechanical and Electrical Engineering	4	2	3	4	3	2	3	4	3	4	3	4	3	3	3	3	4	4	3	3	3	4	3	3	4	4	3	4	3	4	3	3	3	3	4
585	2	6	24	5	生物学 Biology	2	1	5	3	3	4	4	4	4	4	3	4	4	2	4	4	4	4	2	4	4	4	4	4	4	4	4	4	3	4	4	4	3	3	2
586	2	1	18	4	小学教育 Primary education	2	2	4	2	4	2	4	4	1	2	4	1	1	3	2	1	4	4	4	4	3	1	3	3	4	4	4	4	3	4	2	3	4	4	5
587	2	1	18	4	小学教育 Primary education	2	1	5	2	1	4	1	2	1	4	4	4	1	1	1	1	1	1	4	1	4	2	1	1	4	4	4	1	4	1	1	1	1	4	4
588	2	1	18	4	小学教育 Primary education	2	1	1	1	1	1	1	1	1	1	1	1	1	1	1	1	1	1	1	1	5	5	1	4	5	5	5	5	5	5	5	5	5	5	5
589	1	6	24	6	光学工程 Optical Engineering	2	2	5	1	2	4	2	5	4	5	2	5	1	2	2	2	2	2	2	2	2	2	2	2	5	5	5	5	5	5	5	4	4	4	4
590	1	6	24	5	软件工程 Software Engineering	5	1	4	4	2	4	1	5	2	4	3	2	2	4	4	4	5	5	2	4	3	3	4	4	4	4	4	4	2	3	3	3	3	5	4
591	1	6	25	4	生物学 Biology	3	1	3	2	1	2	2	5	2	3	1	2	2	1	2	2	4	1	2	3	3	3	4	3	3	4	2	2	4	4	2	4	3	3	3
592	2	1	18	4	小学教育 Primary education	2	2	3	3	3	3	3	3	3	3	3	3	3	3	3	3	3	3	3	3	3	3	3	3	3	3	3	3	3	3	3	3	3	3	3
593	2	1	18	4	小学教育 Primary education	3	1	4	2	3	4	4	5	3	2	4	3	4	2	2	3	4	3	2	3	4	4	2	3	4	4	4	4	3	4	3	2	2	4	4
594	2	1	18	4	小学教育 Primary education	3	1	4	1	2	1	5	3	1	4	3	2	2	1	1	2	4	2	1	1	1	2	1	1	4	3	4	4	3	4	4	4	3	2	4
595	2	1	18	4	小学教育 Primary education	4	2	4	1	3	4	4	5	3	4	5	4	2	2	2	2	3	5	2	3	4	2	3	3	5	4	3	4	4	3	4	3	1	4	4
596	2	1	18	4	小学教育 Primary education	2	1	2	1	2	3	4	5	2	3	4	4	4	2	3	2	4	2	2	4	4	4	3	3	3	4	4	3	4	4	2	4	3	2	2
597	2	6	24	5	教育学 Pedagogy	3	1	4	3	3	3	2	4	2	4	3	4	2	2	2	3	4	4	3	2	4	3	3	2	4	4	4	3	4	3	2	3	2	3	3
598	2	2	19	4	传播学 Communication	1	1	5	5	5	5	2	2	1	2	4	4	4	4	4	4	4	4	4	4	4	4	2	4	4	4	3	3	4	3	3	4	3	3	3
599	1	2	19	4	行政管理 Administration	3	1	4	4	4	4	4	4	4	4	4	4	4	4	4	4	4	4	4	4	4	4	4	4	4	4	4	4	4	4	4	4	4	4	4
600	2	2	19	4	行政管理 Administration	3	1	5	4	4	1	4	4	4	4	3	3	4	2	4	5	4	4	4	4	5	5	5	5	4	5	5	5	3	4	5	5	5	3	3
601	1	2	20	4	行政管理 Administration	3	1	5	2	4	5	3	3	2	4	4	3	2	5	5	5	5	5	1	4	5	5	5	5	5	5	4	4	2	3	4	4	3	5	5
602	2	2	19	4	行政管理 Administration	3	1	5	1	5	5	5	5	5	5	5	5	5	5	5	5	5	5	5	5	5	5	5	5	5	5	5	5	3	5	5	5	5	5	5
603	1	4	21	4	行政管理 Administration	3	2	5	4	1	4	1	1	5	5	5	5	5	5	4	5	5	5	5	5	5	4	1	5	5	5	5	5	5	3	1	1	1	5	5
604	2	4	21	4	行政管理 Administration	2	2	4	3	4	1	4	3	3	4	3	3	3	4	4	4	5	5	3	4	4	4	4	4	3	3	3	4	2	4	3	4	4	4	4
605	1	4	20	4	行政管理 Administration	4	2	4	2	3	3	4	5	1	4	4	2	3	3	3	2	1	4	2	3	4	5	4	5	5	3	5	1	3	5	3	5	2	4	4
606	2	4	22	4	行政管理 Administration	3	2	3	3	3	4	3	3	3	3	3	3	3	3	3	3	3	3	3	3	3	3	3	3	3	3	3	3	3	3	3	3	3	3	3
607	2	4	22	4	行政管理 Administration	1	1	2	4	3	1	3	3	2	2	3	3	3	2	3	3	4	3	3	2	2	2	4	4	3	3	3	3	3	3	3	3	4	4	3
608	1	4	21	5	行政管理 Administration	3	1	4	1	1	1	4	4	1	4	4	3	4	1	4	4	4	4	2	2	2	4	4	4	4	4	4	1	3	2	4	2	2	4	4
609	2	4	21	4	行政管理 Administration	2	2	4	4	4	4	4	4	4	4	4	4	4	4	4	4	4	4	4	4	4	4	4	4	4	4	4	4	4	4	4	4	4	4	4
610	2	4	20	4	行政管理 Administration	2	2	4	5	5	2	3	5	4	3	4	4	3	2	3	4	5	5	3	3	4	3	3	3	4	3	3	3	3	2	3	2	3	4	3
611	1	4	22	5	行政管理 Administration	1	2	2	1	4	1	4	4	1	3	4	5	2	1	2	2	4	4	3	1	4	4	4	2	4	4	3	1	3	4	1	3	2	4	4
612	1	4	21	4	行政管理 Administration	1	1	4	2	2	4	4	4	5	4	4	2	3	2	1	2	4	2	1	3	2	4	4	2	4	4	4	3	2	4	2	3	4	4	5
613	2	4	21	4	行政管理 Administration	2	2	5	2	4	2	4	5	2	2	2	2	2	2	2	4	5	1	2	2	4	2	4	4	4	2	2	4	2	5	2	4	2	3	4
614	2	4	21	4	行政管理 Administration	2	1	5	3	3	4	4	5	4	5	4	4	3	3	4	5	5	4	4	4	5	3	2	3	4	5	4	4	1	4	4	5	3	3	4
615	2	4	21	4	行政管理 Administration	1	1	3	4	1	2	4	5	1	1	4	5	3	1	4	1	5	1	1	3	4	4	1	2	4	4	4	2	3	2	3	1	2	4	4
616	2	4	21	4	行政管理 Administration	1	1	5	5	2	2	2	4	4	5	5	5	1	3	2	2	5	4	4	2	4	2	1	1	5	5	5	5	5	5	5	4	2	5	4
617	2	4	21	4	行政管理 Administration	2	2	3	1	2	3	4	4	2	2	2	2	3	2	2	4	4	2	2	1	4	2	2	4	4	4	2	2	4	3	1	2	2	3	4
618	1	4	21	4	行政管理 Administration	5	2	5	4	2	2	4	4	4	4	3	3	2	2	4	2	4	4	3	2	3	2	5	5	3	4	4	2	2	4	1	3	3	5	4
619	2	4	21	4	行政管理 Administration	3	2	4	2	3	4	3	4	2	4	4	3	2	2	3	2	4	4	3	2	4	3	4	2	4	4	4	4	2	4	2	4	4	4	4
620	2	4	23	4	行政管理 Administration	5	1	5	3	3	1	3	5	5	5	4	5	3	5	4	5	5	5	3	5	5	4	5	5	4	5	4	5	4	4	3	3	4	4	4
621	2	4	21	4	行政管理 Administration	2	1	3	3	4	2	3	4	3	4	4	2	3	2	3	4	4	3	2	3	4	4	4	3	4	4	4	3	3	3	2	3	2	4	3
622	1	4	21	4	行政管理 Administration	5	1	1	1	1	1	1	5	1	1	2	5	1	1	1	1	1	2	3	1	1	1	3	2	5	5	2	5	3	4	2	1	1	5	3
623	2	4	22	4	行政管理 Administration	4	2	5	2	2	1	4	5	3	4	5	5	3	3	4	4	5	5	5	5	5	4	2	3	5	5	4	5	3	4	2	2	3	4	5
624	1	2	21	4	行政管理 Administration	4	1	5	3	5	3	3	4	5	5	4	3	4	3	4	3	3	2	2	3	3	3	3	4	4	3	3	3	3	4	2	3	3	4	3
625	2	4	21	4	行政管理 Administration	2	1	4	2	3	2	4	4	2	4	4	3	2	2	4	4	4	4	2	2	4	4	4	4	4	4	4	4	4	4	4	4	4	4	4
626	2	4	21	4	行政管理 Administration	3	1	4	3	3	3	2	4	4	4	4	3	3	4	4	4	4	4	4	4	4	4	4	4	4	4	4	4	4	4	4	4	4	4	4
627	2	3	23	4	行政管理 Administration	2	1	4	4	4	4	4	4	4	4	4	4	4	4	4	4	4	4	4	4	4	4	4	4	4	4	4	4	4	4	4	4	4	4	4
628	2	3	20	4	行政管理 Administration	3	1	5	4	3	1	2	5	1	2	3	3	3	3	3	3	3	5	3	4	5	3	1	3	4	4	4	4	4	4	3	3	3	3	3
629	2	3	21	4	行政管理 Administration	1	2	3	2	4	3	4	3	2	3	3	3	3	4	4	3	4	5	3	3	3	4	3	3	5	4	5	3	2	3	3	3	4	3	3
630	2	3	20	4	行政管理 Administration	3	1	5	3	4	2	3	5	1	4	4	5	3	3	4	3	4	4	4	4	4	4	4	4	4	4	4	2	2	3	3	3	3	4	3
631	1	3	19	4	行政管理 Administration	1	2	3	3	2	4	4	4	1	3	3	5	3	3	1	1	4	4	3	2	2	2	2	2	4	4	4	2	5	3	2	3	2	5	5
632	2	3	20	4	行政管理 Administration	2	1	4	2	3	1	3	4	4	4	3	3	3	3	3	3	4	4	3	2	4	4	4	4	4	4	4	3	3	4	4	4	3	3	3
633	2	3	19	5	行政管理 Administration	1	2	4	1	2	2	4	5	1	1	3	2	3	1	1	1	4	1	1	1	4	4	1	1	4	2	3	2	2	4	2	3	2	5	4
634	1	3	21	4	行政管理 Administration	2	1	2	1	4	1	3	4	1	2	2	4	2	2	4	2	5	2	2	2	4	5	2	2	2	4	2	2	2	2	2	2	3	3	4
635	1	3	22	4	行政管理 Administration	3	1	5	2	4	1	4	4	1	2	4	4	2	1	2	2	2	1	2	2	2	3	1	3	4	4	4	3	4	5	4	4	4	4	5
636	2	3	19	4	行政管理 Administration	1	2	3	2	4	2	4	5	3	4	4	5	4	2	2	4	4	4	4	2	4	3	2	4	4	4	2	2	3	4	1	2	2	4	4
637	1	4	21	4	行政管理 Administration	4	1	3	3	3	4	2	4	2	5	2	1	5	5	2	4	5	1	5	2	4	2	4	1	4	4	4	1	1	4	1	4	3	5	1
638	1	3	20	4	行政管理 Administration	3	2	4	4	3	2	3	4	2	4	4	4	3	4	2	4	3	4	4	5	5	4	3	3	4	4	4	4	3	3	3	2	2	5	3
639	2	3	20	4	行政管理 Administration	4	1	4	3	4	3	4	3	3	4	3	4	3	3	4	4	3	4	4	3	2	4	4	3	4	3	3	3	4	4	4	4	3	4	4
640	2	3	20	4	行政管理 Administration	1	2	3	2	3	3	4	5	2	3	4	4	3	2	3	2	4	4	3	2	3	2	3	4	3	4	4	3	2	3	2	2	2	4	4
641	1	3	20	5	行政管理 Administration	2	1	4	2	4	2	3	4	4	2	2	2	4	2	3	4	4	3	4	2	4	4	3	3	3	3	3	2	2	4	2	4	4	4	3
642	1	4	22	4	行政管理 Administration	5	1	2	2	4	2	4	3	2	3	3	2	4	2	3	3	4	2	2	4	4	4	2	4	4	4	3	2	4	4	3	4	4	4	4
643	2	3	20	4	行政管理 Administration	2	1	4	4	4	2	3	2	1	2	3	4	4	2	2	2	4	2	3	3	3	4	2	2	3	4	3	2	2	4	4	4	3	3	3
644	2	2	20	5	行政管理 Administration	2	1	4	2	3	1	4	4	3	2	4	2	3	1	2	2	4	4	3	2	4	4	3	4	4	3	3	3	2	4	2	4	3	4	3
645	1	4	21	4	行政管理 Administration	3	1	5	4	4	2	4	5	4	4	5	3	4	5	4	4	4	4	3	3	4	4	5	4	5	5	5	4	3	3	3	3	4	4	5
646	1	2	23	2	公共事业管理 Public Utility Management	1	1	1	1	2	3	4	2	2	2	2	3	2	2	2	2	2	2	2	2	1	2	2	2	2	1	2	2	2	2	2	2	2	2	1
647	2	3	20	4	行政管理 Administration	1	2	5	2	3	3	1	5	1	2	4	2	4	2	5	5	5	4	1	2	5	5	2	4	5	5	5	3	1	5	2	5	5	5	5
648	2	3	20	4	行政管理 Administration	2	1	4	2	2	1	2	4	2	2	3	3	3	2	3	2	4	4	4	3	3	3	2	2	3	3	3	3	5	4	4	4	4	5	5
649	2	3	21	4	行政管理 Administration	2	2	5	2	1	3	4	4	4	5	3	2	3	4	3	4	5	5	3	2	5	4	2	2	5	5	4	2	2	4	5	3	4	4	5
650	2	4	21	4	行政管理 Administration	2	1	5	5	2	5	5	5	2	5	5	5	5	5	5	5	5	5	3	1	2	2	5	5	5	4	5	2	2	5	5	5	5	4	5
651	1	3	22	4	行政管理 Administration	4	1	5	4	4	1	4	4	2	5	4	3	3	3	4	5	5	4	4	4	4	4	4	4	5	5	5	5	5	5	5	5	5	5	5
652	2	3	20	4	行政管理 Administration	4	2	4	4	4	2	4	3	2	3	4	3	4	2	4	4	4	4	4	4	4	4	4	4	4	3	3	3	2	4	4	4	4	3	3
653	2	3	21	4	行政管理 Administration	3	1	4	3	4	3	3	3	2	3	3	2	3	3	3	3	3	4	3	3	3	3	3	3	3	3	3	3	3	3	3	3	3	3	3
654	2	3	19	4	行政管理 Administration	3	1	4	3	4	2	3	4	1	2	3	2	3	1	1	2	4	3	2	3	3	4	3	3	3	3	3	3	3	3	3	3	4	3	2
655	2	3	20	4	行政管理 Administration	3	2	4	4	3	4	4	4	2	4	4	4	3	4	3	4	4	5	3	4	4	4	4	4	4	4	4	4	4	4	4	4	4	4	4
656	2	3	20	4	行政管理 Administration	2	1	5	2	2	4	2	5	3	5	5	5	2	2	2	3	3	4	3	3	4	3	2	3	5	5	5	3	3	3	3	2	1	4	4
657	2	4	21	4	行政管理 Administration	3	2	5	3	5	5	5	5	3	5	3	5	3	3	5	5	5	5	5	4	5	5	2	3	5	5	5	5	5	5	5	5	5	5	5
658	2	3	20	4	行政管理 Administration	3	1	2	5	3	1	3	5	5	5	3	1	5	1	2	5	5	1	4	3	3	5	5	5	4	3	3	5	1	5	5	5	5	1	3
659	2	2	19	4	行政管理 Administration	2	1	2	4	4	2	4	4	2	4	4	4	2	2	2	2	4	4	4	2	4	4	2	2	4	4	2	2	4	4	4	2	4	2	4
660	1	3	20	4	行政管理 Administration	3	1	4	2	1	3	4	5	1	1	1	4	1	1	1	3	4	1	1	3	5	1	5	3	3	4	1	1	5	5	2	2	1	3	4
661	2	1	18	4	小学教育 Primary Education	2	1	5	5	3	5	4	5	4	4	4	4	4	5	3	3	5	2	3	3	4	4	3	2	3	4	4	4	3	4	3	4	4	3	4
662	2	4	21	4	材料科学与工程 Materials Science and Engineering	3	1	4	4	5	3	3	4	4	4	4	4	4	3	3	3	4	4	3	3	3	4	4	3	4	4	4	4	2	3	4	3	3	4	4
663	1	6	24	5	化学工程 Chemical Engineering	3	1	5	2	4	2	4	3	4	3	4	3	3	2	3	4	4	3	2	3	3	4	3	3	4	3	2	2	4	4	2	4	3	4	4
664	1	5	22	6	化学工程 Chemical Engineering	2	2	4	1	2	3	3	5	4	3	4	5	2	4	4	4	4	5	1	2	4	4	3	2	4	4	4	3	4	2	2	3	2	4	4
665	1	6	25	6	化学工程 Chemical Engineering	1	1	5	2	4	2	2	4	4	4	4	4	3	3	2	4	4	3	2	2	4	2	2	2	4	4	3	3	4	2	2	2	2	4	4
666	2	6	25	5	化学工程 Chemical Engineering	5	1	2	5	5	4	3	2	3	3	3	4	4	4	4	4	4	4	3	2	2	4	2	3	3	4	3	4	3	4	4	3	4	3	4
667	2	5	25	6	语言学 Linguistics	2	1	5	3	2	2	4	4	4	4	4	2	2	2	4	4	4	4	4	4	4	4	4	4	4	4	4	2	4	4	4	4	4	2	3
668	1	5	26	5	化学 Chemistry	2	2	3	2	3	3	4	3	4	3	3	3	4	3	2	3	3	2	3	3	2	3	2	3	3	3	2	3	3	3	2	3	3	3	2
669	2	2	19	5	交通运输 Transportation	2	2	4	2	2	4	4	2	2	4	4	4	2	3	4	4	2	4	3	2	4	4	4	3	3	4	4	4	3	4	3	4	4	3	4
670	2	2	20	5	交通运输（全英文） Transportation（English）	2	1	4	2	4	4	3	4	4	4	4	3	3	2	3	3	4	5	3	4	3	3	3	4	4	4	4	3	2	4	4	4	3	4	4
671	1	7	31	5	机械 Mechanical	3	1	4	4	2	4	3	5	4	4	4	3	3	2	4	3	3	3	3	3	3	3	3	3	4	4	3	3	3	3	3	3	3	4	3
672	1	4	21	4	行政管理 Administration	2	2	3	3	4	4	3	3	4	4	4	4	3	2	4	2	4	4	4	4	4	4	4	4	3	3	3	3	2	4	4	4	2	4	3
673	2	6	23	6	教育学 Pedagogy	2	1	4	2	4	2	4	5	2	3	4	2	2	3	3	4	4	4	2	2	4	4	3	3	4	4	2	4	4	4	2	4	2	3	3
674	2	6	22	6	教育学 Pedagogy	2	1	5	4	4	4	4	3	5	5	3	3	3	4	5	5	5	5	5	4	4	4	5	5	4	4	4	3	2	4	5	4	4	3	2
675	2	6	23	6	教育学 Pedagogy	3	1	5	3	3	5	3	3	2	5	5	3	3	5	5	5	5	5	5	5	3	3	5	3	4	3	4	4	3	5	3	3	2	3	4
676	2	6	24	6	农村教育 Rural Education	2	2	5	4	3	2	4	4	4	4	4	4	3	4	3	4	4	5	4	4	3	4	5	4	4	4	4	4	3	3	4	4	3	3	4
677	2	6	24	6	农村教育 Rural Education	3	2	4	3	3	1	4	4	4	4	4	3	5	3	4	4	4	4	2	3	3	3	4	4	4	4	4	3	3	4	3	4	3	3	3
678	2	3	20	6	小学教育 Primary Education	1	1	2	2	4	3	2	5	4	2	4	5	4	1	1	4	4	2	1	1	2	2	1	1	4	5	1	2	4	3	1	2	1	4	5
679	2	2	18	6	汉语言文学 Chinese Language and Literature	2	1	4	3	4	3	3	3	3	3	3	3	3	3	3	3	3	3	3	3	3	3	3	3	3	3	3	3	3	3	3	3	3	3	3
680	2	5	23	6	学前教育 Preschool Education	1	1	4	2	2	2	4	4	2	4	4	4	4	3	2	4	4	4	4	2	3	2	2	2	4	4	4	2	4	3	3	4	2	4	4
681	1	5	22	6	比较教育	2	1	5	2	2	3	4	4	4	4	4	3	4	4	3	4	4	4	3	4	3	4	3	3	4	4	4	3	3	4	4	4	3	3	3
682	1	2	19	6	小学教育 Primary education	4	1	5	3	4	4	4	4	1	4	3	3	4	3	4	4	4	4	4	4	4	4	4	4	4	4	4	4	4	4	4	4	4	3	4
683	2	2	19	6	教育学 Pedagogy	4	1	4	2	4	3	3	2	2	3	4	2	5	2	3	4	5	4	2	2	3	3	3	5	4	4	4	3	3	4	4	4	4	3	2
684	2	2	19	6	教育学 Pedagogy	3	1	4	1	4	1	2	4	1	1	2	1	1	1	1	4	4	4	4	4	2	4	2	3	4	4	2	2	3	4	3	3	3	3	3
685	2	2	19	6	小学教育 Primary education	2	1	5	2	3	2	4	3	5	5	4	3	4	2	2	4	4	2	3	2	4	4	5	4	4	2	4	3	3	4	4	4	4	3	3
686	2	6	24	6	教育学 Pedagogy	2	1	3	2	3	3	4	4	2	3	2	2	2	2	4	3	4	4	2	4	4	4	4	4	4	4	4	4	4	4	4	4	4	3	3
687	2	2	21	5	学前教育 Preschool Education	2	1	5	2	2	3	1	2	5	5	2	2	4	3	4	5	2	4	2	4	3	4	5	5	2	3	2	2	2	4	2	4	4	2	2
688	2	6	24	6	教育学 Pedagogy	3	1	4	4	4	4	4	3	2	4	4	3	4	4	5	5	5	3	3	4	4	4	5	4	4	4	4	3	4	4	5	4	3	3	3
689	2	6	25	6	教育学 Pedagogy	3	1	1	1	2	2	2	2	1	3	1	2	3	1	1	1	2	1	2	2	2	2	2	1	1	1	2	1	2	1	2	1	2	5	4
690	2	3	21	6	小学教育 Primary education	2	1	4	2	3	4	4	4	4	3	3	2	4	2	3	2	4	4	2	3	4	3	2	3	4	4	4	4	4	4	4	4	4	3	3
691	2	6	25	6	教育学 Pedagogy	3	2	4	4	3	3	4	3	3	4	3	3	2	2	3	3	4	2	2	3	3	4	4	4	4	4	4	3	3	4	4	4	4	3	3
692	2	3	20	6	学前教育 Preschool Education	1	1	4	3	4	2	4	3	3	3	4	4	4	2	4	2	4	4	3	3	4	5	5	4	4	3	3	2	4	4	4	4	4	2	3
693	2	5	22	6	小学教育 Primary education	2	1	4	3	4	3	3	3	3	3	3	3	3	3	3	3	3	3	3	3	3	3	3	3	3	3	3	3	3	3	3	3	3	3	3
694	1	1	19	6	教育学 Pedagogy	2	2	2	2	2	1	3	4	1	4	3	4	2	2	1	1	2	3	4	1	3	2	2	2	4	4	1	2	5	1	1	2	1	4	4
695	2	5	23	6	教育学 Pedagogy	3	1	4	2	2	4	3	5	2	5	5	5	1	4	3	4	5	5	4	4	5	5	3	2	4	4	4	4	4	4	2	3	2	4	4
696	2	6	24	6	哲学 Philosophy	3	1	2	3	4	1	2	4	1	4	3	2	4	2	2	4	4	2	1	1	2	3	4	2	3	3	2	2	2	2	2	2	3	3	2
697	2	5	24	6	比较教育学 Comparative Education	3	1	4	2	5	2	4	5	2	4	5	5	2	1	4	4	5	4	2	5	5	5	5	4	4	4	4	5	3	4	2	4	3	4	4
698	2	5	24	6	比较教育学 Comparative Education	3	1	3	2	2	2	3	4	1	4	4	2	2	2	3	3	4	4	3	3	3	3	2	4	4	4	4	3	4	3	3	3	2	3	3
699	2	5	23	6	教育学 Pedagogy	2	1	4	3	3	4	3	4	3	4	3	3	4	4	3	4	4	4	4	4	4	3	3	4	4	4	4	4	3	4	3	4	3	4	4
700	1	2	19	6	教育学 Pedagogy	1	1	1	1	3	4	3	5	1	3	4	1	1	3	1	3	5	4	5	1	1	4	1	1	5	5	4	2	5	4	3	2	3	3	5
701	2	5	23	6	农村教育 rural education	1	1	4	3	4	2	4	5	4	4	4	3	4	2	2	1	4	2	3	4	4	4	3	4	4	5	4	2	4	4	4	4	4	2	5
702	1	6	25	6	教育经济与管理 Educational Economics and Management	2	1	4	3	4	2	4	4	4	3	4	1	3	3	4	3	4	4	3	2	3	4	1	2	4	3	4	3	4	2	4	3	3	4	4
703	2	5	22	6	学前教育 Preschool Education	3	1	1	2	1	1	1	1	2	2	1	1	2	1	1	1	1	1	1	1	1	1	1	1	1	1	1	1	1	1	1	1	1	2	1
704	2	5	22	4	小学教育 Primary education	3	1	2	1	4	2	4	4	2	2	4	2	2	2	2	2	2	2	2	2	5	2	2	2	4	2	1	2	4	4	3	2	2	3	4
705	1	5	25	6	教育学 Pedagogy	3	1	4	3	4	4	4	4	4	4	4	4	3	4	4	4	4	4	3	3	4	4	4	4	4	3	4	4	4	4	4	3	4	4	4
706	2	5	22	5	课程与教学论 Curriculum and Pedagogy	3	1	5	2	2	5	4	4	4	5	4	2	3	4	4	5	5	5	3	4	5	4	5	5	5	4	4	2	2	4	4	4	4	2	2
707	1	5	48	6	教育经济与管理 Educational Economics and Management	3	3	2	2	3	4	3	3	3	3	3	3	3	2	2	3	4	3	2	2	2	3	2	2	4	4	3	3	4	3	2	3	3	4	4
708	2	5	25	6	教育学 Pedagogy	3	2	5	3	5	2	5	3	5	5	4	5	5	5	5	5	5	5	5	5	5	5	5	5	5	5	2	4	3	3	4	3	4	3	3
709	2	5	25	6	教育学 Pedagogy	2	1	5	5	5	4	4	5	5	5	5	2	2	2	2	2	5	5	5	5	5	5	3	3	5	5	5	3	5	5	3	3	2	5	3
710	2	6	23	6	比较教育学 Comparative Education	3	2	3	2	4	2	3	4	4	3	4	3	4	2	3	4	4	4	3	3	4	4	3	2	4	4	4	4	4	3	4	3	3	4	3
711	2	6	23	6	教师教育 Teacher Education	4	2	5	3	3	2	4	4	5	5	2	2	2	4	5	5	5	5	1	2	4	4	5	5	3	3	3	3	4	4	4	4	5	1	1
712	2	6	24	6	农村教育 rural education	3	2	4	2	2	2	2	2	4	4	2	2	2	2	2	2	4	3	2	2	2	4	4	4	2	3	3	4	2	4	2	4	4	4	4
713	2	6	23	6	教育学 Pedagogy	2	1	4	2	4	3	2	3	2	4	3	2	2	2	2	4	5	4	2	4	3	3	4	4	3	3	4	3	4	4	3	3	3	3	2
714	2	5	23	6	课程与教学论 Curriculum and Pedagogy	3	2	5	5	1	3	2	5	5	5	5	5	5	5	1	5	5	5	1	1	1	1	1	3	5	5	5	3	1	1	1	1	1	5	5
715	2	4	21	6	小学教育 Primary education	1	1	5	2	2	4	2	4	2	4	2	4	1	3	4	4	4	3	1	2	3	2	4	4	2	1	2	1	4	4	4	4	4	5	5
716	2	4	24	6	教育学 Pedagogy	1	1	5	5	4	3	5	2	3	5	3	3	3	3	4	3	5	4	1	2	4	4	2	4	5	1	3	4	5	5	3	5	3	4	2
717	2	6	23	6	教师教育 Teacher Education	2	1	2	4	4	2	4	4	3	2	3	3	2	2	3	3	4	3	3	3	3	2	4	4	3	2	4	3	2	3	3	2	3	4	3
718	2	3	20	6	思想政治教育 Ideological and Political Education	2	2	4	4	4	4	4	4	4	4	4	4	4	4	4	4	3	5	4	4	4	4	4	4	4	4	4	4	4	4	4	4	4	4	4
719	2	3	20	6	哲学 Philosophy	1	2	4	3	3	3	4	4	4	4	3	4	3	4	4	4	4	4	2	3	4	4	4	3	4	4	2	3	3	4	4	4	4	3	3
720	2	3	20	6	思想政治教育 Ideological and Political Education	3	1	5	3	3	4	4	5	2	5	5	5	2	4	3	5	5	5	2	4	5	5	5	2	5	5	5	5	5	3	3	3	2	4	5
721	2	3	21	5	哲学 Philosophy	3	1	4	2	3	2	4	4	4	3	3	2	4	4	4	4	4	4	2	4	4	4	4	4	4	3	2	2	3	4	2	4	4	3	3
722	2	3	19	6	思想政治教育 Ideological and Political Education	3	2	5	3	4	5	3	4	4	5	5	4	4	5	5	5	5	5	3	3	5	3	2	2	5	3	4	4	3	3	2	3	2	4	4
723	1	3	19	6	哲学 Philosophy	2	1	2	3	4	2	3	4	2	3	4	2	4	3	4	3	4	2	4	3	2	4	2	2	4	4	4	4	4	4	4	4	3	4	4
724	2	3	19	6	哲学 Philosophy	4	1	4	2	3	4	4	4	4	4	4	4	3	2	4	4	4	5	2	2	2	4	2	4	4	2	4	4	1	4	2	4	2	4	4
725	2	3	20	6	哲学 Philosophy	3	2	4	2	3	2	4	4	2	3	3	4	2	4	3	2	4	4	4	2	4	3	4	2	4	4	3	2	4	3	2	4	3	3	4
726	2	3	19	6	思想政治教育 Ideological and Political Education	4	2	4	2	2	2	4	2	1	4	4	2	2	1	2	4	3	5	1	2	4	4	4	2	5	2	4	2	5	4	4	2	4	3	2
727	2	3	21	6	思想政治教育 Ideological and Political Education	4	1	1	2	2	1	3	4	3	2	4	2	2	1	4	4	5	4	2	4	4	3	4	4	4	5	3	4	4	4	3	4	2	3	3
728	2	3	20	6	思想政治教育 Ideological and Political Education	3	1	5	2	4	4	4	4	5	4	3	3	4	4	2	4	5	4	1	2	4	4	5	5	4	3	4	2	1	4	3	3	4	3	4
729	2	3	20	6	思想政治教育 Ideological and Political Education	4	1	2	2	4	2	4	4	2	2	4	4	4	2	2	4	3	2	1	2	2	4	4	4	4	4	2	2	4	4	2	3	2	4	4
730	1	3	21	6	思想政治教育 Ideological and Political Education	3	1	4	3	4	3	4	4	4	4	3	3	4	5	4	3	4	4	3	4	4	4	4	4	4	3	4	4	3	4	4	3	3	4	3
731	2	3	20	6	思想政治教育 Ideological and Political Education	3	2	5	4	3	2	4	4	5	4	5	5	4	2	4	2	4	2	3	2	4	4	2	4	4	4	4	4	4	5	5	4	5	4	4
732	2	3	19	6	思想政治教育 Ideological and Political Education	4	1	3	4	4	2	4	4	2	3	4	4	2	3	3	4	5	5	4	5	5	5	5	4	4	4	3	4	4	4	3	3	2	3	4
733	2	3	20	6	思想政治教育 Ideological and Political Education	3	1	4	2	2	2	4	5	2	2	4	4	2	4	2	2	4	4	4	3	2	3	3	3	4	4	4	4	4	3	3	2	2	3	3
734	1	3	20	6	思想政治教育 Ideological and Political Education	3	1	4	2	2	3	4	4	4	4	4	4	4	4	4	2	4	4	2	2	4	4	4	3	4	4	2	1	4	3	2	4	3	4	3
735	2	3	21	6	思想政治教育 Ideological and Political Education	4	1	4	4	2	1	4	5	5	4	4	4	5	3	3	4	5	5	1	1	4	4	4	4	5	5	5	4	4	4	4	4	2	3	5
736	2	3	21	6	思想政治教育 Ideological and Political Education	3	2	4	4	2	2	3	5	2	4	4	5	3	2	3	2	5	2	4	4	4	3	3	4	4	5	4	2	4	4	3	2	2	4	4
737	2	3	20	6	思想政治教育 Ideological and Political Education	3	2	5	2	4	3	2	5	2	2	4	2	4	2	3	2	5	4	2	4	5	5	2	2	4	4	4	3	2	4	5	5	4	3	2
738	2	3	20	5	哲学 Philosophy	2	1	4	2	2	2	2	4	3	3	3	3	3	5	4	4	3	4	4	4	4	3	4	3	4	3	5	4	4	3	4	4	3	4	4
739	2	3	20	6	思想政治教育 Ideological and Political Education	4	1	4	2	4	2	4	5	1	4	4	2	4	3	2	4	5	4	3	2	4	3	5	5	4	2	2	4	3	3	4	4	3	2	2
740	2	3	21	5	哲学 Philosophy	2	1	4	4	4	4	4	4	4	4	4	4	3	4	3	4	4	4	4	3	4	4	4	4	4	4	4	3	3	4	4	4	4	4	4
741	2	3	20	6	思想政治教育 Ideological and Political Education	3	1	4	2	1	2	1	4	2	2	3	3	2	2	2	4	2	2	2	2	2	2	1	2	4	4	4	4	4	2	1	2	2	4	4
742	1	3	21	6	思想政治教育 Ideological and Political Education	2	1	5	4	3	3	4	4	2	2	4	4	2	2	2	2	4	4	2	4	4	2	2	2	5	5	5	5	5	5	3	4	2	4	2
743	2	3	21	6	思想政治教育 Ideological and Political Education	4	1	4	2	5	2	4	4	5	5	4	3	2	4	4	5	5	5	4	3	3	3	4	4	4	5	4	4	2	3	4	4	3	4	3
744	2	3	20	6	思想政治教育 Ideological and Political Education	2	1	5	3	4	4	4	3	4	3	2	3	2	2	4	3	2	4	2	4	4	4	4	4	4	5	2	2	4	4	4	4	4	2	2
745	2	3	20	6	思想政治教育 Ideological and Political Education	4	1	4	2	4	2	3	3	4	3	3	4	4	3	2	2	2	4	2	2	2	2	2	2	4	4	2	2	2	2	2	2	2	3	3
746	2	3	20	6	哲学 Philosophy	4	1	1	4	3	4	2	4	2	4	2	4	2	2	2	4	2	4	3	3	2	2	2	2	3	2	2	1	2	3	2	3	2	3	4
747	2	3	20	6	哲学 Philosophy	4	2	4	2	4	4	4	4	4	4	4	4	4	4	4	4	4	3	4	4	4	4	5	4	4	3	4	3	3	4	4	3	4	3	4
748	2	2	20	6	思想政治教育 Ideological and Political Education	2	1	5	2	2	4	4	4	4	4	4	2	4	4	4	4	4	4	2	3	4	4	4	4	4	3	4	2	3	4	4	4	4	4	2
749	2	3	20	6	哲学 Philosophy	5	1	5	2	4	2	4	2	2	2	2	4	4	2	2	3	4	2	2	4	2	4	2	4	4	4	2	4	2	4	4	4	4	2	2
750	2	3	20	6	思想政治教育 Ideological and Political Education	3	1	4	4	3	2	3	2	2	3	2	2	4	2	2	2	4	4	4	2	4	3	3	4	3	2	3	2	3	4	2	5	4	4	3
751	2	3	20	5	思想政治教育 Ideological and Political Education	3	2	3	3	3	3	3	3	3	3	3	3	3	3	3	3	3	3	3	3	3	3	3	3	3	3	3	3	3	3	3	3	3	3	3
752	2	3	20	6	哲学 Philosophy	3	1	4	4	4	1	5	4	2	4	2	2	4	1	4	3	5	4	3	5	4	5	5	5	4	4	4	4	4	4	4	4	4	4	4
753	2	3	21	6	哲学 Philosophy	3	1	4	2	3	4	4	4	4	4	3	4	4	2	4	4	4	4	2	3	4	4	4	4	4	2	4	2	3	4	2	2	3	3	3
754	2	3	20	6	思想政治教育 Ideological and Political Education	4	2	4	2	3	2	3	3	2	4	3	3	3	3	3	2	2	2	2	3	3	2	3	3	3	4	3	3	4	3	2	4	4	3	3
755	2	3	19	6	思想政治教育 Ideological and Political Education	3	1	4	2	4	2	3	4	1	2	4	4	2	2	2	2	4	2	4	2	2	4	2	2	5	5	4	2	4	4	4	4	2	4	4
756	2	3	21	6	思想政治教育 Ideological and Political Education	4	1	4	2	4	2	4	5	4	4	5	4	4	3	4	4	4	5	2	4	4	4	5	5	4	5	4	3	4	2	3	4	4	3	5
757	2	2	20	6	思想政治教育 Ideological and Political Education	5	1	4	4	4	3	4	4	4	4	4	4	4	3	2	2	4	3	3	2	3	3	4	4	4	4	4	3	2	4	4	3	4	3	3
758	2	2	19	5	思想政治教育 Ideological and Political Education	4	1	4	4	5	3	4	4	2	4	4	2	4	4	4	4	5	2	2	2	4	3	4	4	4	4	3	2	3	4	3	2	2	3	3
759	2	3	21	6	哲学 Philosophy	5	1	4	4	4	4	4	2	2	4	4	4	4	4	4	4	4	4	4	4	4	4	4	4	4	4	4	3	4	4	3	4	3	4	3
760	2	2	21	5	思想政治教育 Ideological and Political Education	3	1	2	4	2	2	2	4	4	4	2	2	5	5	4	4	4	5	1	2	2	2	4	2	4	4	4	4	2	4	4	4	2	2	5
761	2	5	22	6	教育经济与管理 Educational Economics and Management	1	2	3	2	4	4	4	3	1	4	2	1	2	1	3	1	5	4	4	3	5	5	2	2	4	4	3	5	4	4	1	4	2	4	4
762	2	2	20	6	思想政治教育 Ideological and Political Education	1	1	2	4	4	2	4	4	1	1	5	3	2	2	4	1	4	4	3	4	4	4	4	4	4	3	2	3	4	4	4	4	4	4	4
763	2	3	20	6	思想政治教育 Ideological and Political Education	5	1	4	4	3	3	2	3	4	4	4	2	4	3	4	4	3	2	3	4	4	3	2	3	4	3	4	3	4	3	2	3	2	3	4
764	2	3	20	6	思想政治教育 Ideological and Political Education	1	1	5	1	3	3	5	4	2	4	4	1	2	2	3	1	5	5	3	1	2	4	5	5	5	5	5	1	4	5	1	4	3	5	5
765	2	3	20	6	思想政治教育 Ideological and Political Education	2	1	4	3	3	4	4	4	2	2	2	3	4	3	4	4	4	4	3	4	4	4	2	2	3	3	4	4	3	4	4	4	3	4	4
766	2	3	19	6	思想政治教育 Ideological and Political Education	1	2	4	2	3	3	4	4	2	4	4	2	2	2	3	2	4	4	2	4	2	2	4	4	4	4	2	4	3	4	3	3	2	4	3
767	2	3	20	6	哲学 Philosophy	3	1	4	2	2	2	4	4	3	4	3	2	4	4	4	4	2	4	2	2	4	4	4	4	4	4	4	4	2	4	2	4	2	3	2
768	2	3	20	6	哲学 Philosophy	1	1	4	4	4	3	4	3	2	2	3	3	4	1	2	2	4	4	5	2	3	2	2	2	4	4	4	4	3	4	3	3	3	2	3
769	2	3	20	5	哲学 Philosophy	3	1	2	3	2	2	3	3	2	4	2	2	4	3	2	4	4	3	2	2	2	4	3	2	1	1	2	2	4	4	2	4	3	3	4
770	2	2	19	4	行政管理 Administration	1	2	4	4	4	4	3	4	4	4	4	4	4	4	4	4	4	4	4	4	4	4	4	4	4	4	4	4	4	4	4	4	4	4	4
771	2	6	24	6	学前教育 Preschool Education	1	1	4	2	4	1	4	3	2	4	4	5	2	1	2	4	5	5	2	2	3	2	4	4	4	5	2	2	4	4	5	2	4	3	2
772	2	5	22	6	教育学 Pedagogy	2	1	4	4	3	3	4	4	3	3	4	4	4	2	4	2	4	2	4	4	4	4	3	3	4	4	4	4	4	3	2	2	3	4	4
773	1	3	21	6	计算机科学与技术 Computer Science and Technology	3	2	5	3	2	1	1	4	2	4	4	4	2	2	3	4	4	4	4	2	4	4	1	1	5	5	4	1	2	2	3	2	2	4	2
774	2	4	21	5	财务管理 Financial Management	3	1	4	2	2	2	4	4	4	4	3	2	2	2	4	4	4	5	2	2	4	4	2	2	4	4	4	2	4	4	4	2	4	2	4
775	2	3	20	5	思想政治教育 Ideological and Political Education	3	1	5	2	4	4	4	4	1	4	4	4	4	4	1	4	4	4	4	3	5	4	1	1	4	4	4	4	2	2	2	2	2	4	5
776	2	4	22	4	市场营销 Marketing	2	2	1	2	2	2	2	2	5	4	2	2	2	5	2	2	2	4	4	4	4	4	4	3	2	3	3	3	4	4	4	4	4	4	4
777	2	2	19	6	小学教育 Primary education	4	1	4	2	4	3	3	3	4	2	4	2	4	3	2	3	4	4	5	3	3	4	2	4	4	3	2	2	4	4	2	3	2	4	5
778	1	4	21	5	保险学 Insurance	2	1	5	1	3	2	1	4	4	5	4	4	4	1	1	3	3	1	2	2	4	4	1	2	3	3	3	3	3	3	3	3	3	3	3
779	1	3	20	6	哲学 Philosophy	3	1	5	1	2	4	2	4	4	5	2	4	5	1	1	4	4	5	2	1	4	5	2	4	4	5	2	1	4	5	1	4	2	5	5
780	2	2	20	4	小学教育 Primary education	4	1	2	4	2	2	4	4	4	4	4	4	4	4	4	4	4	4	4	4	4	4	4	4	4	4	4	4	4	4	4	4	4	4	4
781	2	2	20	4	小学教育 Primary education	1	1	4	2	4	4	4	4	2	4	4	5	5	2	5	5	4	4	2	4	4	4	5	4	4	4	4	4	4	4	2	5	4	5	5
782	2	2	20	4	小学教育 Primary education	3	1	3	3	4	4	4	3	3	4	5	3	4	4	4	3	4	4	4	3	4	3	4	4	3	3	4	3	4	4	4	4	3	4	4
783	2	2	19	4	小学教育 Primary education	3	1	4	4	4	1	3	4	5	4	4	2	4	2	4	4	4	5	2	4	2	4	5	4	4	2	4	4	4	2	2	4	2	2	2
784	2	2	19	4	小学教育 Primary education	3	1	4	4	4	4	5	5	4	5	4	4	4	4	5	2	5	5	3	3	3	4	4	4	4	4	3	4	5	4	3	3	3	3	4
785	2	2	20	4	小学教育 Primary education	3	1	5	5	5	3	4	4	4	5	3	2	4	5	5	4	5	4	3	4	4	4	2	4	4	4	4	4	5	4	4	4	4	4	2
786	1	2	19	4	小学教育 Primary education	5	1	3	4	2	2	2	4	4	2	2	2	2	1	2	2	2	2	2	2	3	4	2	2	3	3	2	2	3	3	3	3	3	4	4
787	2	4	21	4	汉语言 Chinese Language	1	1	4	4	4	4	4	4	4	4	4	4	4	4	4	4	4	4	4	4	4	4	4	4	4	4	3	3	4	3	3	4	3	3	3
788	2	2	19	4	小学教育 Primary education	3	1	3	2	4	2	3	4	1	2	3	2	4	3	4	4	4	4	3	4	3	4	4	4	4	4	4	4	3	5	3	4	3	3	1
789	2	2	20	4	小学教育 Primary education	3	1	5	2	4	2	4	4	4	3	5	3	5	3	2	2	4	4	4	3	3	4	4	3	5	5	5	3	2	2	4	3	3	3	3
790	1	2	19	4	小学教育 Primary education	3	1	1	2	4	2	2	1	4	1	4	1	2	4	2	4	2	4	2	4	2	1	4	2	2	4	2	4	2	4	2	2	4	2	2
791	2	2	19	4	小学教育 Primary education	3	1	4	4	4	4	4	4	2	4	2	2	2	2	4	4	4	4	3	4	4	4	4	4	4	2	2	2	4	4	4	4	4	4	2
792	2	2	19	6	地理科学 Geographical Sciences	3	1	2	2	2	1	3	4	1	1	4	2	4	1	2	1	2	1	2	2	3	3	2	3	3	3	1	3	4	3	2	1	2	4	3
793	2	3	20	5	思想政治教育 Ideological and Political Education	5	1	4	4	2	2	4	2	4	4	2	4	3	2	4	4	2	2	2	2	2	2	2	2	2	3	3	3	3	3	3	3	3	3	3
794	2	2	20	4	小学教育 Primary education	3	1	2	4	4	4	4	5	2	4	3	2	4	2	3	2	4	4	3	4	4	4	4	2	3	4	3	3	3	4	2	4	2	4	3
795	2	2	19	4	小学教育 Primary education	4	1	5	2	4	2	4	5	5	5	3	2	4	4	4	4	5	4	4	2	4	4	2	4	4	3	4	4	2	4	2	4	4	2	2
796	2	2	19	4	小学教育 Primary education	4	1	3	4	1	1	2	4	2	2	3	4	2	2	2	2	3	2	2	2	4	4	4	2	4	2	2	4	3	3	2	3	2	4	3
797	1	6	25	4	地理科学 Geographical Sciences	1	1	5	2	2	5	3	3	3	3	3	3	3	3	3	3	3	3	3	3	3	3	3	4	4	2	4	3	4	2	4	4	3	4	3
798	2	2	20	4	小学教育 Primary education	2	1	5	3	5	2	3	4	4	4	4	1	5	3	4	5	5	5	2	4	5	4	4	4	5	4	2	2	3	4	4	5	5	4	5
799	2	2	18	4	小学教育 Primary education	1	1	5	4	4	4	5	4	4	4	4	4	4	4	4	5	4	5	4	4	4	4	4	4	4	3	4	4	3	4	4	3	4	4	4
800	2	2	19	5	小学教育 Primary education	1	1	4	4	4	3	4	4	2	4	3	3	4	4	4	4	4	4	3	4	4	4	4	4	3	3	3	3	2	4	5	5	3	3	3
801	2	2	19	4	小学教育 Primary education	1	1	4	3	4	3	4	5	3	4	4	2	4	3	3	2	3	3	3	3	4	4	3	3	4	4	4	3	5	4	3	3	3	4	4
802	2	4	21	4	文化产业管理 Cultural Industry Management	3	1	5	1	4	4	4	2	4	4	2	1	4	3	3	4	4	4	1	1	4	4	1	3	5	4	4	2	2	4	2	4	4	2	1
803	2	2	20	4	小学教育 Primary education	3	1	2	1	4	2	2	5	2	2	4	1	1	1	2	2	5	5	2	1	2	1	2	4	4	4	4	4	4	4	4	4	1	4	2
804	2	6	26	5	小学教育 Primary education	1	1	4	4	3	2	4	4	4	5	3	3	4	4	4	4	4	4	3	2	4	4	3	2	4	3	4	2	4	4	4	4	2	2	4
805	1	4	21	6	哲学 Philosophy	3	2	2	2	3	4	3	4	2	2	3	5	2	2	3	2	4	5	4	3	4	3	4	3	4	3	4	3	5	4	4	4	2	3	4
806	2	2	18	5	小学教育 Primary education	1	2	4	5	2	4	3	5	2	3	3	3	2	1	3	4	5	5	2	1	4	3	3	4	4	4	3	3	4	4	2	3	2	3	4
807	2	2	20	5	小学教育 Primary education	2	1	4	2	1	1	3	3	2	4	4	4	4	3	2	1	3	4	3	2	4	4	1	1	4	4	4	3	3	4	1	1	2	4	4
808	2	2	19	4	小学教育 Primary education	2	1	5	2	3	2	5	4	2	2	2	2	4	2	4	4	4	4	5	5	5	5	3	4	4	3	2	2	4	5	5	4	5	3	2
809	1	3	21	6	哲学 Philosophy	1	1	2	2	3	1	2	2	1	2	4	2	2	2	1	2	3	3	2	2	4	2	2	2	4	4	3	1	5	4	1	1	4	5	5
810	1	3	20	6	思想政治教育 Ideological and Political Education	1	1	3	1	2	4	4	4	2	2	4	3	2	2	2	2	4	2	2	2	4	4	3	2	4	4	2	2	4	4	2	4	2	4	4
811	2	2	19	4	小学教育 Primary education	3	1	2	2	3	2	3	4	2	3	4	3	3	4	3	3	4	4	3	4	3	4	4	4	4	4	4	4	5	4	4	4	4	4	4
812	2	3	20	6	思想政治教育 Ideological and Political Education	2	1	4	2	2	4	4	4	2	4	4	4	2	4	4	4	4	4	4	4	4	4	4	4	4	4	4	4	4	4	4	4	4	4	4
813	2	3	20	5	哲学 Philosophy	3	2	4	3	4	4	4	3	4	4	4	3	3	2	4	4	4	4	4	4	4	4	4	4	4	4	3	3	3	4	3	3	4	3	3
814	2	5	24	6	学前教育学 Preschool Education	1	1	4	4	4	2	4	2	4	4	4	2	4	4	4	4	4	4	4	4	2	2	1	2	4	4	4	4	4	4	4	4	4	4	2
815	2	2	19	4	小学教育 Primary education	3	1	4	4	4	4	4	4	3	4	4	4	4	4	4	4	4	4	4	4	4	4	4	4	4	4	4	4	4	4	4	4	4	4	4
816	2	2	20	4	小学教育 Primary education	1	1	5	4	1	1	4	5	1	5	4	3	2	3	5	5	5	4	4	4	4	4	5	4	5	4	5	5	5	5	5	5	3	4	4
817	1	2	20	6	哲学 Philosophy	3	1	4	2	4	4	4	4	4	4	4	4	4	4	4	4	4	4	4	4	4	4	4	4	4	4	4	4	4	4	4	4	4	4	4
818	2	4	21	5	小学教育 Primary education	1	1	1	1	1	1	1	1	1	1	1	1	1	1	1	1	1	1	1	1	1	1	1	1	1	1	1	1	1	1	1	1	1	1	1
819	2	2	19	4	哲学 Philosophy	2	2	1	1	1	1	1	2	2	1	1	1	1	1	1	1	1	1	1	1	1	1	1	1	1	1	1	1	1	1	1	1	1	1	1
820	1	3	21	6	哲学 Philosophy	4	1	4	3	4	2	3	4	2	4	4	3	4	3	3	3	3	4	4	4	3	4	4	3	4	4	3	3	4	4	4	4	4	4	3
821	2	6	24	5	小学教育 Primary education	2	2	5	5	2	4	2	4	4	5	4	4	4	3	2	4	4	4	2	3	4	3	5	3	4	5	3	4	4	3	3	2	3	3	4
822	2	3	19	6	思想政治教育 Ideological and Political Education	2	1	4	4	4	4	4	5	2	4	2	2	2	2	4	3	4	5	2	5	5	5	3	4	2	2	4	4	4	5	2	4	5	4	4
823	2	2	20	4	小学教育 Primary education	3	1	4	4	3	3	2	4	2	4	4	4	2	2	2	3	3	2	3	3	4	3	3	3	4	4	3	4	5	4	3	4	3	3	4
824	2	2	18	6	思想政治教育 Ideological and Political Education	2	1	4	4	4	5	5	3	4	4	4	4	5	2	4	1	5	5	2	2	2	4	3	2	5	5	5	4	4	4	4	4	2	5	5
825	2	6	26	4	小学教育 Primary education	3	2	5	3	5	4	5	5	5	4	5	4	5	5	5	5	5	5	5	4	5	5	4	4	4	5	3	4	4	4	4	4	4	4	4
826	2	5	23	5	哲学 Philosophy	2	1	5	2	2	4	4	4	2	4	5	5	2	4	4	4	5	5	2	4	4	4	4	4	4	4	3	2	4	4	4	3	3	2	2
827	2	2	19	4	小学教育 Primary education	1	2	4	2	3	4	3	3	2	4	4	2	2	3	2	4	4	4	3	3	4	3	3	3	4	4	3	3	3	3	4	2	2	4	3
828	2	2	20	6	汉语言文学（师范） Chinese Language and Literature(Normal）	2	1	5	4	3	1	4	3	2	4	3	2	3	2	4	4	5	5	2	2	4	4	5	5	4	4	4	3	3	4	4	5	2	2	2
829	2	3	20	6	哲学 Philosophy	3	1	5	3	4	4	4	5	4	3	3	2	3	3	5	5	3	2	1	2	5	5	4	5	5	5	3	3	3	4	3	4	2	3	4
830	1	3	21	6	思想政治教育 Ideological and Political Education	5	1	5	1	1	1	2	5	1	5	3	4	3	3	5	5	5	5	5	1	5	2	5	5	4	4	4	5	1	4	4	4	4	4	2
831	2	7	26	6	少年儿童组织与思想意识教育 Children's Organization and Ideological Education	3	1	4	2	3	2	3	4	2	2	4	4	2	2	3	3	4	4	2	3	4	4	4	4	4	3	3	2	4	4	3	2	3	4	4
832	2	4	21	4	小学教育 Primary education	3	1	5	3	4	4	4	3	4	4	4	2	4	4	3	4	4	4	4	4	4	4	4	4	4	4	4	4	4	4	4	4	4	4	4
833	2	4	21	4	哲学 Philosophy	4	1	5	4	4	4	4	4	4	5	4	3	4	4	5	4	5	5	3	4	4	4	5	5	4	3	3	4	3	4	4	4	3	4	3
834	2	6	23	5	少年儿童组织与思想意识教育 Children's Organization and Ideological Education	2	1	2	4	4	4	4	5	4	4	5	5	3	2	2	2	4	4	2	3	4	5	3	2	4	4	4	2	5	4	4	4	4	3	2
835	2	5	23	5	少年儿童组织与思想意识教育 Children's Organization and Ideological Education	3	1	4	4	4	4	4	4	4	4	4	4	4	4	4	4	4	4	4	4	4	4	4	4	4	4	4	4	4	4	4	4	3	4	2
836	1	2	18	4	小学教育 Primary education	3	1	4	4	4	4	4	4	4	4	4	4	4	4	4	4	4	4	4	4	4	4	4	4	4	4	4	4	4	4	4	4	4	4	4
837	2	3	19	6	思想政治教育 Ideological and Political Education	1	1	4	2	3	2	4	4	1	4	4	3	4	4	1	2	3	5	3	2	4	3	5	4	5	5	4	2	4	4	1	2	4	5	5
838	2	2	19	4	小学教育 Primary education	2	1	2	3	4	3	3	5	3	3	2	4	4	3	4	4	4	3	2	3	2	3	4	3	4	4	4	2	4	4	4	3	4	3	4
839	2	2	19	4	小学教育 Primary education	3	2	4	4	4	3	3	4	3	4	4	2	4	3	2	4	4	4	4	2	2	2	4	4	4	4	4	4	4	4	2	4	4	4	4
840	2	2	20	4	小学教育 Primary education	3	1	4	2	2	2	4	4	4	4	3	3	4	2	4	4	4	4	2	4	4	4	4	4	3	4	2	3	3	4	3	2	3	4	5
841	2	4	21	6	公共事业管理 Public Utility Management	3	1	3	2	4	3	4	4	2	2	4	3	3	2	2	2	3	2	4	4	4	2	2	2	4	4	4	4	3	2	3	3	2	4	2
842	2	3	20	6	哲学 Philosophy	1	1	4	2	1	3	3	3	2	3	3	2	4	2	4	3	3	2	2	3	3	3	4	2	4	4	4	4	4	3	4	3	4	3	3
843	2	6	24	4	小学教育 Primary education	2	2	4	2	3	3	3	5	4	4	4	3	2	1	4	3	3	3	3	3	4	4	5	5	4	4	4	3	4	4	2	2	3	4	3
844	2	3	21	5	哲学 Philosophy	4	1	2	2	2	2	2	2	2	2	2	2	2	2	2	2	2	2	2	2	2	2	2	2	2	2	2	2	3	3	3	2	2	2	3
845	2	3	20	5	哲学 Philosophy	1	1	1	3	3	4	4	5	5	4	2	2	2	2	4	3	4	4	2	3	3	3	5	2	3	4	4	3	4	3	4	2	1	4	4
846	2	4	20	6	公共事业管理 Public Utility Management Public Utility Management	1	1	4	2	3	3	3	5	1	4	2	5	1	1	3	4	4	4	1	2	1	3	3	2	3	2	3	1	2	4	4	4	2	3	4
847	1	4	24	6	公共事业管理 Public Utility Management	1	1	4	4	2	4	4	5	4	4	4	4	2	4	2	4	5	5	5	1	2	4	4	2	5	5	1	2	4	3	1	2	2	2	4
848	2	4	22	6	公共事业管理 Public Utility Management	1	1	4	2	4	2	2	2	4	4	4	2	4	2	2	3	4	4	3	3	4	4	3	2	4	4	4	4	4	4	3	2	2	4	4
849	1	2	18	5	少年儿童组织与思想意识教育 Children's Organization and Ideological Education	2	2	2	4	2	4	4	4	5	4	3	2	4	1	4	3	4	4	1	1	2	3	2	2	4	3	4	2	4	4	2	4	4	2	4
850	2	3	20	6	思想政治教育 Ideological and Political Education	2	1	3	2	2	2	2	4	2	3	3	2	2	2	3	2	3	4	2	3	4	3	3	2	4	4	4	3	2	3	4	4	3	3	3
851	2	7	25	5	少年儿童组织与思想意识教育 Children's Organization and Ideological Education	1	2	4	2	4	1	2	4	4	3	4	2	3	3	2	3	4	4	4	3	4	3	3	4	4	4	4	2	3	3	2	3	2	3	2
852	2	4	21	6	小学教育 Primary education	3	1	1	3	2	1	1	2	4	2	2	4	2	2	3	4	4	4	2	2	2	2	3	3	2	4	2	2	3	2	4	4	3	3	3
853	1	4	21	6	历史学 History	4	1	5	5	5	5	3	5	4	5	5	5	2	5	1	5	5	5	5	2	4	3	4	4	5	5	5	3	3	5	5	2	2	5	5
854	2	5	23	6	教育学 Pedagogy	1	1	5	4	2	2	2	3	2	3	4	2	2	2	2	3	4	3	4	4	4	4	3	3	3	3	3	3	3	3	3	3	3	3	3
855	2	2	19	4	行政管理 Administration	2	1	4	4	3	5	4	4	1	5	4	4	3	2	2	2	3	5	4	2	4	4	3	4	4	2	4	3	1	2	4	4	2	4	4
856	2	3	19	4	书法学 Calligraphy	2	1	4	4	4	4	4	4	3	4	3	4	4	4	4	3	4	4	4	3	4	3	3	3	3	4	3	3	3	3	3	3	3	3	3
857	1	3	22	4	法学 Law	2	1	4	3	4	4	4	3	4	4	3	4	3	3	3	4	3	2	4	4	4	3	4	4	4	4	4	4	4	4	4	4	4	4	4
858	1	3	20	4	书法学 Calligraphy	4	2	3	3	3	3	3	3	3	3	3	3	3	3	3	3	3	3	3	3	3	3	3	3	3	3	3	3	3	3	3	3	3	3	3
859	2	7	18	4	音乐	1	3	5	1	5	1	1	1	1	5	5	3	4	4	3	4	4	4	4	4	4	4	4	4	4	4	4	4	4	4	4	4	4	4	4
860	2	3	20	4	书法学 Calligraphy	3	2	4	4	3	3	4	4	3	4	4	4	3	3	2	4	2	4	2	2	4	4	2	4	4	4	4	4	4	4	4	4	4	4	4
861	1	3	20	5	书法学 Calligraphy	2	1	4	4	3	3	4	4	3	4	3	4	2	2	2	4	4	3	3	4	4	3	4	4	4	3	2	4	3	4	2	4	3	4	4
862	2	3	21	4	法学 Law	1	1	4	4	3	2	3	3	5	3	2	5	4	2	3	4	4	5	2	4	4	4	4	4	3	3	4	3	3	2	3	5	5	3	4
863	2	3	21	4	法学 Law	5	3	4	3	3	3	3	4	4	3	4	4	4	4	4	4	4	4	4	4	4	3	3	3	3	3	3	3	4	2	4	2	3	4	2
864	2	3	21	4	书法学 Calligraphy	3	1	2	1	2	1	3	4	2	2	4	2	2	2	2	2	2	2	2	2	2	2	2	1	2	2	2	3	2	2	3	3	2	3	2
865	2	3	21	4	法学 Law	3	1	4	4	4	4	4	4	4	4	4	4	4	4	4	4	4	4	3	4	4	4	3	4	4	4	4	4	4	4	4	4	4	4	4
866	2	3	22	4	法学 Law	2	1	1	3	3	2	3	2	1	3	2	3	3	2	3	3	2	2	3	4	4	2	3	4	2	3	4	3	4	4	3	3	3	3	3
867	2	2	20	4	书法学 Calligraphy	3	1	4	4	2	4	3	3	4	4	3	4	3	4	3	3	4	4	4	3	4	4	3	3	4	4	4	3	4	4	4	4	3	4	3
868	1	3	20	4	书法学 Calligraphy	3	2	4	1	4	3	3	4	4	3	3	1	4	2	4	4	4	4	3	4	3	4	4	3	3	4	3	2	5	5	5	5	5	3	3
869	2	3	20	4	书法学 Calligraphy	3	1	3	4	3	2	3	2	4	4	2	2	2	2	4	2	4	2	4	4	4	4	4	4	4	4	2	2	4	4	2	4	2	3	3
870	1	3	19	4	书法学 Calligraphy	3	1	2	2	2	1	3	4	1	2	3	3	4	2	2	3	3	4	2	1	1	1	1	2	3	4	3	3	4	3	3	2	3	3	4
871	1	3	22	4	书法学 Calligraphy	2	1	2	2	1	4	4	1	4	2	1	1	1	2	1	1	1	2	2	4	4	4	4	4	4	4	4	4	4	4	4	4	4	4	4
872	1	3	20	4	书法学 Calligraphy	3	2	4	2	3	3	2	4	4	4	4	3	4	4	2	4	4	4	3	4	3	3	3	3	2	3	2	3	2	4	3	4	2	4	3
873	2	3	19	4	书法学 Calligraphy	1	2	5	3	2	3	2	4	1	3	3	4	2	2	2	3	4	3	2	2	4	2	2	2	3	4	3	3	3	4	2	4	4	5	4
874	1	3	21	4	书法学 Calligraphy	2	2	5	4	2	5	5	5	5	5	4	5	5	3	5	5	5	5	4	5	4	4	4	4	5	5	5	5	5	4	3	2	1	5	4
875	1	3	20	4	书法学 Calligraphy	3	1	5	4	4	3	3	4	5	4	4	4	4	4	4	4	4	4	3	3	3	4	3	4	4	4	4	4	4	4	4	4	3	4	4
876	1	3	20	4	书法学 Calligraphy	2	2	2	2	2	2	2	2	2	2	4	4	4	2	2	2	4	3	2	2	2	2	2	2	4	4	2	2	4	3	1	2	2	4	4
877	2	3	21	4	书法学 Calligraphy	3	2	4	1	1	1	2	5	1	2	5	4	1	1	1	3	5	5	5	1	2	1	4	2	5	5	5	2	3	2	2	2	1	5	5
878	2	3	21	4	书法学 Calligraphy	2	1	4	2	5	2	5	3	4	4	4	4	4	3	2	4	4	4	4	4	4	3	2	2	4	4	4	5	5	4	3	4	4	5	3
879	1	4	20	4	书法学 Calligraphy	1	2	4	3	2	3	3	4	4	4	3	2	4	2	3	3	3	5	2	2	2	3	3	2	4	5	4	4	2	3	1	2	3	5	2
880	1	3	20	5	书法学 Calligraphy	1	2	4	1	3	3	4	4	3	4	3	3	4	3	3	4	3	3	3	2	2	3	1	1	2	4	3	4	4	3	3	4	4	4	4
881	2	3	20	4	书法学 Calligraphy	3	1	4	4	4	2	4	4	4	4	3	2	4	2	4	4	4	4	2	4	3	4	4	3	4	4	3	3	4	4	4	4	4	4	4
882	2	3	19	4	书法学 Calligraphy	3	2	5	2	4	1	2	4	2	3	4	4	4	4	2	4	4	4	2	2	3	3	3	2	4	4	3	3	4	4	3	3	3	4	4
883	1	3	20	4	书法学 Calligraphy	3	2	5	3	2	3	4	5	1	3	5	5	1	3	1	4	3	4	4	2	4	3	3	4	5	5	4	2	4	3	1	2	1	5	5
884	2	3	22	4	书法学 Calligraphy	1	1	5	3	3	2	2	4	3	4	4	3	1	2	2	4	4	4	1	1	4	3	4	2	3	4	4	4	2	3	4	2	2	3	3
885	2	3	20	4	书法学 Calligraphy	4	1	4	4	2	3	2	4	4	4	4	2	4	4	4	4	4	4	3	3	3	4	4	3	4	4	4	4	4	4	4	2	3	4	3
886	1	3	20	4	书法学 Calligraphy	3	1	5	3	4	1	3	4	2	2	4	4	4	1	2	2	4	4	2	3	4	4	4	3	4	4	2	4	4	3	1	4	4	3	4
887	2	3	21	4	书法学 Calligraphy	2	1	4	4	4	2	4	3	3	3	4	3	4	3	4	4	4	4	4	4	4	3	4	4	4	4	3	4	4	3	3	4	4	3	3
888	1	3	18	4	书法学 Calligraphy	1	1	2	1	4	2	4	1	2	3	2	3	1	2	2	2	2	5	3	2	3	3	3	1	4	4	3	3	5	3	2	4	3	5	4
889	1	3	22	4	书法学 Calligraphy	3	1	4	5	4	4	2	4	4	4	3	3	3	3	4	4	4	3	4	3	4	4	3	4	4	4	4	4	4	4	3	3	4	4	3
890	1	3	21	4	书法学 Calligraphy	1	1	5	3	3	5	5	5	5	5	5	4	5	3	4	4	4	5	4	4	4	4	5	4	4	4	2	4	4	4	4	4	3	4	3
891	2	3	20	4	书法学 Calligraphy	3	1	4	3	4	3	2	3	2	4	4	3	4	3	2	3	4	4	3	3	4	4	4	3	4	4	2	3	4	3	4	3	3	3	3
892	2	3	21	4	书法学 Calligraphy	2	3	2	3	2	2	4	4	5	4	2	5	4	1	3	3	2	1	4	2	4	4	2	4	4	4	4	4	4	4	4	4	4	4	4
893	1	3	20	4	书法学 Calligraphy	3	1	4	2	2	4	2	4	4	3	4	2	1	3	3	3	4	4	4	3	4	3	2	2	4	4	4	4	5	4	2	2	4	4	4
894	1	3	20	4	书法学 Calligraphy	3	2	4	2	3	1	3	4	5	5	4	3	4	4	4	4	3	5	4	3	4	4	4	4	4	4	3	4	4	4	3	2	4	4	3
895	2	3	20	4	书法学 Calligraphy	2	1	4	3	4	3	4	4	4	4	4	3	3	3	3	5	5	4	3	3	2	2	1	4	5	5	4	3	3	4	2	4	3	2	3
896	1	3	21	4	书法学 Calligraphy	1	1	4	2	3	2	4	3	2	3	2	3	2	2	3	2	4	4	3	2	3	4	3	2	4	3	3	3	3	3	3	3	3	3	3
897	2	3	20	4	书法学 Calligraphy	2	2	4	4	4	3	4	4	3	4	4	3	2	2	2	3	4	4	2	3	3	3	3	3	4	4	4	3	3	4	3	3	2	3	4
898	2	3	22	4	书法学 Calligraphy	3	1	4	3	4	3	3	2	4	4	2	3	4	3	4	2	4	4	1	2	4	4	4	4	1	3	1	2	2	4	4	4	4	3	4
899	1	3	20	4	书法学 Calligraphy	2	1	2	1	2	1	2	5	4	2	4	1	2	1	2	1	4	1	2	2	2	2	2	2	4	4	1	2	4	4	1	2	2	5	4
900	2	3	20	5	书法学 Calligraphy	2	1	5	2	3	1	1	3	2	4	4	3	2	2	2	2	4	2	2	3	4	4	4	4	4	4	4	4	3	3	2	2	3	3	4
901	2	3	20	4	书法学 Calligraphy	3	1	2	1	2	1	2	4	1	4	4	4	1	1	1	2	4	4	2	1	2	4	2	1	4	4	2	2	2	2	2	2	1	4	4
902	2	3	21	4	书法学 Calligraphy	3	1	5	3	4	3	4	3	5	4	3	2	4	3	5	4	4	5	4	4	4	5	5	4	3	4	4	4	3	4	4	4	4	4	3
903	2	3	20	4	书法学 Calligraphy	2	1	4	2	3	2	3	3	4	4	3	4	4	2	2	4	4	5	3	3	3	4	3	3	3	4	4	4	3	4	4	3	3	3	3
904	2	3	20	4	书法学 Calligraphy	4	2	4	3	3	3	3	4	3	3	3	4	3	3	3	3	4	3	3	3	3	3	3	3	3	3	3	3	3	3	3	3	3	3	3
905	2	3	20	4	书法学 Calligraphy	4	1	5	2	4	3	4	4	4	5	4	3	5	3	4	5	4	3	2	4	4	4	5	4	4	4	4	4	3	4	4	4	4	3	3
906	2	3	19	3	书法学 Calligraphy	3	1	4	3	3	1	3	5	2	5	4	4	4	2	2	2	4	4	2	1	2	3	2	2	4	4	4	4	5	4	2	3	3	5	4
907	2	3	22	4	书法学 Calligraphy	1	2	1	2	2	1	2	4	2	4	4	2	4	1	4	2	5	4	4	2	4	4	2	2	4	4	3	2	4	2	2	2	3	4	4
908	2	3	21	4	书法学 Calligraphy	4	1	5	3	4	3	4	4	3	4	4	3	2	4	4	4	4	4	3	3	4	3	3	3	4	4	4	3	3	4	3	3	3	4	4
909	2	3	21	4	书法学 Calligraphy	3	2	4	1	3	3	3	3	4	4	3	3	2	2	3	4	4	2	2	4	3	4	4	4	3	4	3	3	3	4	4	4	4	3	4
910	2	3	21	3	书法学 Calligraphy	1	1	2	4	3	2	3	4	4	4	4	4	3	2	3	2	3	3	3	3	4	3	3	3	4	4	4	4	4	4	2	3	2	4	4
911	2	3	20	4	书法学 Calligraphy	3	1	4	2	4	3	3	4	2	4	4	3	3	3	2	3	3	4	2	2	2	3	2	2	4	4	4	3	2	3	2	2	2	3	3
912	2	3	20	4	书法学 Calligraphy	1	2	4	1	2	3	2	4	2	3	3	4	3	2	2	3	4	4	3	3	3	3	2	2	3	3	2	3	4	4	3	3	3	4	3
913	2	3	20	4	书法学 Calligraphy	2	2	4	3	3	3	4	4	4	4	4	3	4	3	4	4	4	4	3	4	4	4	3	3	4	4	4	4	3	4	4	3	4	4	4
914	2	3	21	4	书法学 Calligraphy	2	1	3	2	2	3	3	5	2	2	4	4	4	2	3	3	4	5	2	2	4	4	2	3	4	3	2	3	3	5	4	3	4	3	5
915	2	3	21	4	书法学 Calligraphy	1	1	5	2	2	1	3	4	1	2	3	2	2	1	3	2	4	2	3	3	4	3	2	2	4	3	2	3	4	3	3	4	3	3	3
916	2	6	23	6	教育经济与管理 Educational Economics and Management	2	1	4	3	3	2	3	4	2	4	4	4	3	3	2	2	4	4	2	3	3	3	4	4	4	4	3	3	4	4	2	3	3	4	3
